# Supplementary material for: Prediction of lateral lymph node metastasis in rectal cancer patients based on MRI using clinical, deep transfer learning, radiomic, and fusion models
Source: Front Oncol. 2024 Jul 19;14:1433190. doi: 10.3389/fonc.2024.1433190 (PMC11294238; doi:10.3389/fonc.2024.1433190)
Supplement: Supplementary file 2 [file DataSheet_2.xlsx]

## Sheet: Clinic_data
ID	Gender	Age	Height	Weight	CEA	CA199	T_stage	N_stage	Distance_from_lower_end_to_anal_margin	Lesion_Length	Number_of_enlarged_mesorectal_lymph_nodes	Number_of_enlarged_lateral_lymph_nodes	CRM	EMVI	nCRT	label
1.nii.gz	1	67	173	75	20.18	89.9	2	2	0	8.5	4	1	0	0	0	1
2.nii.gz	0	68	153	74	11.34	17.3	3	2	3.5	4	3	4	1	1	0	1
3.nii.gz	1	67	175	76	2.89	3.1	3	1	5	3.5	2	1	1	1	0	1
4.nii.gz	1	62	180	65	4.03	17.7	3	1	6	5	2	1	1	0	0	1
5.nii.gz	1	58	182	92	4.3	4.6	3	2	11	5	4	1	1	1	0	1
6.nii.gz	1	59	176	70	1.87	7.6	3	2	4	4	4	2	1	1	0	1
7.nii.gz	1	61	178	95	2.43	13.1	3	2	6.8	5	3	2	0	0	0	1
8.nii.gz	0	60	160	57	2.79	9.5	3	1	4.8	3	0	1	1	0	0	1
9.nii.gz	0	74	163	62	3.48	51.6	4	2	9.2	4.7	2	4	0	1	0	1
10.nii.gz	0	76	155	48	4.77	3.7	4	2	5.7	3.5	4	1	0	1	0	1
11.nii.gz	1	51	170	75	3.85	4.2	3	1	4.6	3.5	0	1	1	1	0	1
12.nii.gz	1	78	156	46	4.05	23.1	3	1	4	3.5	0	1	1	0	0	1
13.nii.gz	0	55	165	72	5.96	2	3	1	3	2	0	1	1	0	0	1
14.nii.gz	1	63	179	90	2.07	10	3	2	4.5	5.5	1	1	1	0	0	1
15.nii.gz	0	56	160	61	1.9	2.3	3	1	3.5	4	2	1	1	0	0	1
16.nii.gz	0	61	158	58	61.82	2	4	1	2.5	5	0	1	1	1	1	1
17.nii.gz	1	45	170	80	2.29	5.6	2	1	3.5	2.5	0	1	0	0	0	1
18.nii.gz	1	79	168	60	13.75	6.5	3	2	6.5	5.5	2	2	0	1	0	1
19.nii.gz	1	62	174	65	20.11		3	1	3.8	5.5	0	3	1	1	0	1
20.nii.gz	1	66	175	65	13	16.3	3	2	3.5	6	4	2	0	1	0	1
21.nii.gz	1	49	160	58		1.48	3	2	3.5	8	4	4	1	1	1	1
22.nii.gz	1	46	170	70	5.08		3	2	4	3	4	3	0	0	0	1
23.nii.gz	0	57	158	60	10.08		4	2	1.5	6	4	4	1	1	0	1
24.nii.gz	1	76	170	78	7.02		3	1	4	5	1	3	0	1	0	1
25.nii.gz	1	63	172	85	11.65	3.79	3	1	3.5	4	0	1	1	1	0	1
26.nii.gz	1	43	180	76	8.94	8.06	3	1	4.5	4	0	2	0	0	0	1
27.nii.gz	0	34	165	61.5	1.88		4	2	11	6	4	1	1	1	0	1
28.nii.gz	1	61	170	69	5.7		3	1	1	1.6	1	1	0	0	0	1
29.nii.gz	1	68	162	72.5	28.1	340.2	3	1	5	5	0	1	0	1	0	1
30.nii.gz	0	64	158	55	16.8	1000	3	2	4.5	5	4	2	1	1	0	1
31.nii.gz	1	43	167	74	2.87	13.8	2	2	2.5	3	1	4	0	0	0	1
32.nii.gz	0	55	148	65	15.5	18.57	3	2	2.5	4	1	2	1	1	0	1
33.nii.gz	0	51	158	52	27.96		4	2	5	5	2	3	0	1	1	1
34.nii.gz	1	53	170	80	33.93	2	3	2	6	5.5	3	1	0	1	0	1
35.nii.gz	1	71	164	69			3	2	5.5	3.5	2	4	1	1	1	1
36.nii.gz	0	38	160	55	5.3	27.9	3	2	4	18	9	6	1	1	0	1
37.nii.gz	1	75	170	55	9.93	6.3	3	1	2.5	4.5	0	1	1	1	0	1
38.nii.gz	1	69	170	60	2.57	50.31	2	1	4	5	1	1	1	0	0	1
39.nii.gz	0	60	160	59	30.7		4	2	6	7	4	1	1	1	1	1
40.nii.gz	1	74	170	74	11.9	11.15	3	1	6	3.5	1	1	1	0	0	1
41.nii.gz	0	34	162	47	1.94	26.76	3	2	4.5	5	4	1	1	1	0	1
42.nii.gz	0	46	162	58	2.74	7.31	2	1	4	3	0	1	0	0	0	1
43.nii.gz	0	75	155	40	5.13	2.77	3	1	3.5	3.5	0	1	0	0	0	1
44.nii.gz	1	67	160	72	13.95	3.7	3	2	7	6	2	3	1	1	1	1
45.nii.gz	1	56	170	70	50.58	43.5	3	2	5	4	4	4	1	1	1	1
46.nii.gz	0	45	160	61	34.26	8.2	4	2	3	5.5	4	2	1	1	1	1
47.nii.gz	1	56	178	85	6.3	18.4	3	2	6	5	2	1	0	0	1	1
48.nii.gz	0	59	165	57	2.1	9.4	3	2	3	4.5	4	1	1	1	1	1
49.nii.gz	1	67	172	90	4.3	6.2	4	1	4.8	6.2	2	1	1	1	1	1
50.nii.gz	1	66	170	69	84.82	431.2	4	1	2.3	3.5	0	2	1	1	1	1
51.nii.gz	1	40	176	79	20.7	12.6	3	1	4.5	4.3	2	2	0	0	1	1
52.nii.gz	0	40	158	51	119.98	39.47	4	2	4.5	1.8	4	2	1	0	1	1
53.nii.gz	1	39	180	88	2.45	3.5	3	2	3.5	2	4	2	0	0	1	1
54.nii.gz	0	63	160	50	1.74	15.6	3	1	4.5	4	1	2	1	1	1	1
55.nii.gz	1	44	169	62	29.47	93.3	3	2	4	6	4	3	1	1	1	1
56.nii.gz	1	52	172	78	5.6	2	3	2	3	3.5	4	1	1	0	1	1
57.nii.gz	1	62	179	70	7.75	7	3	1	4	5	1	1	1	1	0	1
58.nii.gz	0	69	150	65	24.25	54	3	1	3	3.5	0	1	1	0	0	1
59.nii.gz	1	62	173	80	1.79	2.69	3	1	0	3	0	2	1	1	0	1
60.nii.gz	0	44	158	57	79.1		3	2	6.5	7	4	2	1	1	0	1
61.nii.gz	0	65	155	68	15.8	18.58	3	1	3.5	3.5	0	1	1	0	0	1
62.nii.gz	0	72	155	65	6.37	20.95	3	1	3.5	5	1	1	1	1	0	1
63.nii.gz	1	74	165	58			3	1	3	3	0	1	0	0	0	1
64.nii.gz	0	58	165	65	17.84	6.88	3	1	5.5	5	0	2	0	0	0	1
65.nii.gz	1	57	176	72			3	1	4	4	0	2	1	0	0	1
66.nii.gz	1	57	170	80	6.35		3	1	3.5	5	1	1	1	0	0	1
67.nii.gz	0	44	168	42	12.71	38.5	3	1	1	5.5	0	1	1	0	0	1
68.nii.gz	1	75	160	75	2.74		3	1	0	6.5	0	1	1	0	0	1
69.nii.gz	1	71	170	72	2.43	7.79	2	1	2.5	3	0	1	0	0	0	1
70.nii.gz	0	26	163	64	0.69	20.3	2	1	2	5.5	0	2	1	0	0	1
71.nii.gz	1	64	174	76	1.71	1200	3	2	0	6.5	4	1	1	1	0	0
72.nii.gz	1	72	174	74	11.58	25.2	3	1	2	5.5	0	2	1	0	0	0
73.nii.gz	1	65	170	70	1.33	8.5	3	2	5.5	3.5	2	1	1	1	0	0
74.nii.gz	1	66	176	84	3.59	12.1	3	2	4	3.5	4	1	1	1	0	0
75.nii.gz	1	67	180	82	1.61	2	3	1	5	4	1	1	1	1	0	0
76.nii.gz	1	47	170	75	12.03	7	3	1	5	3	0	1	1	1	0	0
77.nii.gz	1	71	170	54	21.73	5	3	1	6.3	5	3	1	1	0	0	0
78.nii.gz	1	63	176	65	56.3	147.5	4	2	12	9	4	3	0	1	0	0
79.nii.gz	0	54	160	66	2.6	4.9	3	2	6	4	4	1	0	0	0	0
80.nii.gz	1	63	172	76	20.45	1200	3	2	4.5	4	1	1	0	0	0	0
81.nii.gz	1	41	175	88	1.49	2	3	1	6	3	3	1	0	0	0	0
82.nii.gz	0	52	164	75	2.69	111.5	3	1	8.7	4	1	2	0	0	0	0
83.nii.gz	1	36	188	105	15.17	2	3	1	3.6	4.5	2	1	1	0	0	0
84.nii.gz	0	60	156	48	7.38	52.4	3	1	4	3	0	1	0	0	0	0
85.nii.gz	0	70	152	55	75.76	5.3	3	2	10	3.7	2	3	0	0	0	0
86.nii.gz	0	57	163	69	1.89	2	2	1	6	3	0	1	0	0	0	0
87.nii.gz	1	50	174	75	76.75	23.1	4	1	5	5.7	3	1	0	1	0	0
88.nii.gz	1	36	178	76	29.08	36.8	3	1	4.5	5.5	0	1	0	1	0	0
89.nii.gz	1	79	170	50	10	2	4	2	1	5	3	1	1	0	0	0
90.nii.gz	1	56	165	60	3.68	3.9	3	1	3.5		0	1	1	0	0	0
91.nii.gz	1	61	170	75	2.54	10	3	1	2	4	0	1	1	0	0	0
92.nii.gz	0	71	155	65	7.73	20.9	3	1	8	5	1	1	1	1	0	0
93.nii.gz	1	61	170	63	11.9	8.07	3	1	5.5	5	1	1	0	0	0	0
94.nii.gz	0	64	164	75	1.26	29.75	3	1	4	3	0	1	0	0	0	0
95.nii.gz	1	58	173	72	27.94	29.7	3	1	3	3.5	0	1	0	0	0	0
96.nii.gz	1	58	178	90			3	2	5.5	4.5	4	1	0	1	0	0
97.nii.gz	1	66	170	72	12.22		3	1	6	5	0	1	1	1	0	0
98.nii.gz	1	69	174	87	2.89	2	3	1	6	3	2	1	1	1	0	0
99.nii.gz	1	60	170	75	50.41	6.5	4	1	3	3.5	0	1	1	1	0	0
100.nii.gz	1	58	163	61	9.73		4	2	6	8.5	4	4	1	1	0	0
101.nii.gz	0	60	163	60	28.7		3	2	2	7	2	1	1	0	0	0
102.nii.gz	1	67	176	95	2.87	2.3	3	1	6	5.5	1	1	0	0	0	0
103.nii.gz	1	49	170	50	11.6		3	1	3.5	3.5	0	3	1	0	0	0
104.nii.gz	1	64	166	75	4.49	4.92	3	1	1	2	1	1	0	0	0	0
105.nii.gz	1	64	165	75	1.61	6.4	4	1	0.5	4	0	1	1	0	0	0
106.nii.gz	1	73	172	68	1.48	3.9	3	1	4	3.5	0	1	1	0	0	0
107.nii.gz	0	37	165	53	7.14	26.2	3	1	7.5	2.5	1	1	0	0	0	0
108.nii.gz	1	83	170	65	3.44		3	2	3.5	5	4	1	1	1	0	0
109.nii.gz	0	75	155	50	3.23	3.3	3	1	5	3.5	1	1	0	0	0	0
110.nii.gz	1	56	170	56	4.12	9.4	4	2	4.5	5	4	2	1	1	0	0
111.nii.gz	1	64	179	80			3	1	4	7	1	1	0	0	0	0
112.nii.gz	1	68	174	80	3.03	33.8	3	2	4.5	4	1	1	0	0	0	0
113.nii.gz	0	31	155	55	1.96		3	2	5.5	3.5	4	2	1	1	0	0
114.nii.gz	1	76	168	76	2.61		3	1	6	3.6	0	2	1	0	0	0
115.nii.gz	1	52	165	47	1500	187.4	3	1	6	3	2	1	1	1	0	0
116.nii.gz	1	65	158	70	4.01	5.3	3	2	1	4	4	1	1	1	0	0
117.nii.gz	1	69	177	77	4.57	2	3	1	10	3.2	1	1	0	1	0	0
118.nii.gz	1	62	175	88	3.17	5.4	2	1	4.5	2	0	1	0	0	0	0
119.nii.gz	0	72	165	55	131.68	38.7	3	1	1.5	4.5	2	1	0	0	0	0
120.nii.gz	0	36	156	52	0.75	6.9	4	2	2.5	5	1	4	1	1	0	0
121.nii.gz	0	84	158	72	3.56	2.67	2	1	3	3	0	1	1	0	0	0
122.nii.gz	1	63	170	70	4.39	14.4	3	1	6.5	5.5	2	1	1	0	0	0
123.nii.gz	0	54	158	45	1500	33.4	4	2	5	9	4	1	1	1	0	0
124.nii.gz	1	51	170	75	12.74	16.78	3	2	4.3	3	1	3	1	1	1	1
125.nii.gz	0	59	158	65	9.88	1238.08	3	2	4	6	8	3	1	1	1	1
126.nii.gz	1	59	180	77	1.65	5.32	3	2	5.9	10.7	7	1	1	1	1	1
127.nii.gz	1	35	170	75	11.54	197.04	3	2	6.2	2.5	3	1	1	0	1	1
128.nii.gz	1	63	178	80	5.91	6.01	4	2	5	3.5	3	1	1	0	1	1
129.nii.gz	0	47	168	67	1.37	4.98	3	1	0	3.5	2	1	1	0	0	1
130.nii.gz	0	59	160	70	1.38	4.71	2	1	4.7	4	2	1	0	0	0	0
131.nii.gz	0	68	160	60	7.04	17.61	3	1	1.5	6	0	1	1	0	0	0
132.nii.gz	1	69	168	55	4.16	3.58	3	2	3.7	3	4	1	0	1	0	1
133.nii.gz	1	45	175	80	27	25.67	3	2	4	9	3	1	0	1	1	1
134.nii.gz	0	62	160	61	1.33	6.21	2	1	2.4	4	2	1	0	0	0	1
135.nii.gz	1	59	167	67	2.23	9.68	3	2	3.9	3	3	1	0	0	1	1
136.nii.gz	1	59	163	52	2.75	6.15	3	1	4	1.5	1	3	0	0	0	0
137.nii.gz	0	55	164	54	213.59	86.73	3	2	2.8	0.7	7	4	1	1	1	1
138.nii.gz	1	53	173	59	2.94	51.2	4	2	5.1	5	4	3	1	1	1	1
139.nii.gz	1	57	176	47	52.63	4.34	3	2	2	3.3	3	1	1	0	0	0
140.nii.gz	0	55	164	58	2.21	529.31	4	2	7.3	7	3	1	1	0	0	1
141.nii.gz	0	40	163	63	5.54	88.73	4	1	1.5	4.5	1	1	1	0	0	1
142.nii.gz	1	63	165	62	3.59	4.62	3	2	9.5	5	4	1	1	1	0	0
143.nii.gz	0	76	150	60	1.06	7.79	3	1	2.4	5	0	1	0	0	0	1
144.nii.gz	1	62	167	65	2	4.37	3	2	6	7	4	1	1	1	0	0
145.nii.gz	1	57	176	84	6.72	3.97	3	2	4.1	11	8	1	0	1	0	0
146.nii.gz	0	52	160	50	2.34	14.11	3	2	7	3	3	3	0	0	1	1
147.nii.gz	0	57	165	69	5.55	5.72	3	2	4.4	5.5	3	3	1	1	0	1
148.nii.gz	1	80	165	52	3.94	11.02	4	2	7	5.5	4	2	1	0	0	0
149.nii.gz	0	59	160	75	5.65	30.38	3	1	7	0.8	0	1	0	0	0	0
150.nii.gz	1	44	170	70	0.89	6.65	3	2	5	5	8	1	1	1	1	1
151.nii.gz	0	55		63		2	3	2	8	4.2	6	2	1	1	0	0
152.nii.gz	1	59		53	7.55	29.92	3	1	5	5.4	1	1	0	1	0	1

## Sheet: VLLN_features
ID	log_sigma_2_0_mm_3D_firstorder_10Percentile_max	log_sigma_2_0_mm_3D_firstorder_90Percentile_max	log_sigma_2_0_mm_3D_firstorder_Energy_max	log_sigma_2_0_mm_3D_firstorder_Entropy_max	log_sigma_2_0_mm_3D_firstorder_InterquartileRange_max	log_sigma_2_0_mm_3D_firstorder_Kurtosis_max	log_sigma_2_0_mm_3D_firstorder_Maximum_max	log_sigma_2_0_mm_3D_firstorder_Mean_max	log_sigma_2_0_mm_3D_firstorder_MeanAbsoluteDeviation_max	log_sigma_2_0_mm_3D_firstorder_Median_max	log_sigma_2_0_mm_3D_firstorder_Minimum_max	log_sigma_2_0_mm_3D_firstorder_Range_max	log_sigma_2_0_mm_3D_firstorder_RobustMeanAbsoluteDeviation_max	log_sigma_2_0_mm_3D_firstorder_RootMeanSquared_max	log_sigma_2_0_mm_3D_firstorder_Skewness_max	log_sigma_2_0_mm_3D_firstorder_TotalEnergy_max	log_sigma_2_0_mm_3D_firstorder_Uniformity_max	log_sigma_2_0_mm_3D_firstorder_Variance_max	log_sigma_2_0_mm_3D_glcm_Autocorrelation_max	log_sigma_2_0_mm_3D_glcm_ClusterProminence_max	log_sigma_2_0_mm_3D_glcm_ClusterShade_max	log_sigma_2_0_mm_3D_glcm_ClusterTendency_max	log_sigma_2_0_mm_3D_glcm_Contrast_max	log_sigma_2_0_mm_3D_glcm_Correlation_max	log_sigma_2_0_mm_3D_glcm_DifferenceAverage_max	log_sigma_2_0_mm_3D_glcm_DifferenceEntropy_max	log_sigma_2_0_mm_3D_glcm_DifferenceVariance_max	log_sigma_2_0_mm_3D_glcm_Id_max	log_sigma_2_0_mm_3D_glcm_Idm_max	log_sigma_2_0_mm_3D_glcm_Idmn_max	log_sigma_2_0_mm_3D_glcm_Idn_max	log_sigma_2_0_mm_3D_glcm_Imc1_max	log_sigma_2_0_mm_3D_glcm_Imc2_max	log_sigma_2_0_mm_3D_glcm_InverseVariance_max	log_sigma_2_0_mm_3D_glcm_JointAverage_max	log_sigma_2_0_mm_3D_glcm_JointEnergy_max	log_sigma_2_0_mm_3D_glcm_JointEntropy_max	log_sigma_2_0_mm_3D_glcm_MaximumProbability_max	log_sigma_2_0_mm_3D_glcm_SumEntropy_max	log_sigma_2_0_mm_3D_glcm_SumSquares_max	log_sigma_2_0_mm_3D_gldm_DependenceEntropy_max	log_sigma_2_0_mm_3D_gldm_DependenceNonUniformity_max	log_sigma_2_0_mm_3D_gldm_DependenceNonUniformityNormalized_max	log_sigma_2_0_mm_3D_gldm_DependenceVariance_max	log_sigma_2_0_mm_3D_gldm_GrayLevelNonUniformity_max	log_sigma_2_0_mm_3D_gldm_GrayLevelVariance_max	log_sigma_2_0_mm_3D_gldm_HighGrayLevelEmphasis_max	log_sigma_2_0_mm_3D_gldm_LargeDependenceEmphasis_max	log_sigma_2_0_mm_3D_gldm_LargeDependenceHighGrayLevelEmphasis_max
1.nii.gz	-17.053	40.7416	1.73588e+07	4.08273	30.5869	3.00093	57.0029	13.2125	18.5816	14.0313	-54.5887	111.592	13.1072	314.054	-0.510883	1.38871e+08	0.0690857	527.565	215.799	7627.02	-146.683	48.9208	27.0541	0.293719	4.07745	3.26812	8.88709	0.312093	0.217663	0.955731	0.86042	-0.30553	0.953107	0.215793	14.4997	0.0111724	6.75	0.0347081	4.55626	18.9937	5.73395	44.2614	0.251485	1.80217	12.1591	21.0878	221.085	7.71591	1952.57
10.nii.gz	-28.0394	51.8466	4.85673e+06	4.05225	43.7575	2.22391	64.671	7.29066	23.7094	0.691825	-44.1188	108.79	17.7319	308.594	0.388288	3.88538e+07	0.0672818	802.443	149.001	25109.8	468.938	106.165	15.5863	0.744829	2.82588	2.74967	7.25305	0.400868	0.322078	0.972236	0.895465	-0.547986	0.993584	0.334334	11.2405	0.0200059	5.80463	0.048493	4.46083	30.4377	4.55958	19.8627	0.389466	0.471357	3.43137	32.3329	152.902	3.94118	717.725
100.nii.gz	-15.6875	50.0827	5.91359e+06	3.76395	57.5296	8.00925	105.083	21.2523	24.4254	22.9316	-22.8147	134.22	19.8968	322.098	1.80064	3.51041e+07	0.100694	757.973	131.424	16808.8	427.272	97.8045	22.6177	0.680727	3.48646	3.11362	10.1679	0.419207	0.344883	0.979769	0.913207	-0.4101	0.991268	0.392299	11.1422	0.0406852	5.77993	0.0729005	4.09453	29.0411	4.57369	21.5965	0.5	0.822306	5.07018	30.4983	138.754	4	554.123
101.nii.gz	-2.22689	41.1911	1.4014e+07	3.75283	22.1662	2.86928	58.6405	19.372	13.6695	17.8231	-28.6284	87.2689	9.48932	319.831	-0.11611	1.12112e+08	0.0873248	293.23	115.479	1520.46	9.1711	22.2231	20.7841	0.0276012	3.76321	2.81299	4.59219	0.317509	0.222652	0.943624	0.838453	-0.363532	0.9615	0.221108	10.728	0.018722	5.99287	0.0452017	3.91318	10.7518	5.43898	34.1095	0.248974	1.80979	11.9635	11.598	119.788	8.29927	935.818
102.nii.gz	3.18976	53.0769	1.63202e+07	3.80961	30.0219	2.23596	64.1677	29.3322	15.3192	30.7753	-15.1206	79.2883	11.451	329.85	-0.191376	1.30561e+08	0.0797333	341.351	125.448	4088.02	-45.4241	42.1644	6.57443	0.728297	1.91225	2.50537	2.78286	0.476883	0.408141	0.979011	0.9056	-0.284784	0.932595	0.378308	10.7946	0.0153967	6.3995	0.0544804	4.55506	12.1847	5.41331	38.4933	0.256622	1.75396	11.96	13.5844	120.5	7.38667	1037.66
103.nii.gz	-12.2018	27.7835	4.76227e+06	3.23794	18.6618	3.00023	32.465	11.4284	11.4569	14.2888	-25.5588	58.0238	8.00546	311.752	-0.786761	3.80981e+07	0.1212	201.502	90.1432	1534.3	-92.7951	21.2553	6.6314	0.520916	2.02744	2.36212	2.14003	0.448367	0.374985	0.96441	0.874283	-0.365878	0.944494	0.384868	9.29958	0.0337506	5.09133	0.0580801	3.59834	6.97168	4.20075	20.6735	0.421908	0.632237	5.93878	8.12162	85.4898	4.71429	448.551
104.nii.gz	-21.035	24.8501	4.70339e+06	3.47562	18.3331	3.62501	38.0636	0.234539	13.4288	1.84599	-51.8889	89.9525	8.3061	300.749	-0.338353	3.76271e+07	0.113905	308.952	151.904	4661	-88.3596	34.6099	12.0794	0.48501	2.63466	2.83305	4.87505	0.428675	0.350738	0.969479	0.887322	-0.399644	0.965466	0.286731	12.0942	0.0331648	5.39487	0.108047	3.97083	11.6723	4.61843	14.8462	0.285503	2.03994	5.92308	12.865	144.673	6.84615	1087.44
105.nii.gz	26.5038	54.3583	463436	2	19.6197	1.44809	57.5487	40.134	12.0973	39.3915	24.2043	33.3444	7.5224	340.381	0.113404	3.70749e+06	0.25	167.826	13.25	1.26562	0	0.5625	23.125	-0.932836	4.375	0.25	0.5625	0.21875	0.0944231	0.764197	0.664103	-0.916667	0.929873	0.113852	4.0625	0.4375	1.25	0.4375	0.25	5.92188	2	4	1	0	1	7.25	27.5	1	27.5
106.nii.gz	-65.2322	-3.20797	1.03897e+06	3.18201	45.7225	1.70664	-2.08184	-28.7215	22.3353	-18.0589	-71.3809	69.2991	17.4141	272.419	-0.540527	4.15588e+06	0.122449	620.182	119.131	6354.32	-229.301	52.0994	38.0625	0.108207	4.6875	2.58596	12.9269	0.328678	0.253868	0.880515	0.791909	-0.645532	0.988059	0.264717	10.7438	0.0669531	3.95471	0.096875	3.06096	22.5405	3.18201	6.71429	0.479592	0.673469	1.71429	25.5969	121.357	3.14286	591.071
107.nii.gz	-8.17723	29.1244	967100	2.64644	22.9547	2.30888	40.6653	10.5366	13.1549	9.48515	-18.2065	58.8717	9.04131	310.982	0.0944204	3.8684e+06	0.18	277.045	55.2917	811.74	-12.6343	21.6303	24.8917	-0.0793785	4.375	2.11479	5.6625	0.25003	0.137832	0.883168	0.762522	-0.629961	0.973405	0.143825	7.4625	0.0979167	3.3942	0.129167	2.35254	11.6305	2.64644	6.8	0.68	0.16	1.8	11.64	55.2	1.6	115.2
108.nii.gz	-62.652	23.2067	3.35756e+06	3.67845	53.2175	2.24148	29.8573	-8.29153	26.3431	1.82848	-73.2479	103.105	20.3594	293.413	-0.749123	2.68605e+07	0.095332	997.409	236.828	38541.4	-1159.49	127.64	14.4184	0.792086	2.96626	2.681	4.68951	0.388059	0.301234	0.969953	0.884396	-0.560387	0.991081	0.257925	14.4396	0.0321498	5.22397	0.0901207	4.08709	35.5147	4.20169	14.0769	0.360947	1.66075	3.71795	39.4635	231.179	5.35897	1737.85
109.nii.gz	-21.711	9.73097	3.01236e+06	3.16633	21.9547	1.91524	17.1676	-6.86678	10.0608	-7.07254	-25.26	42.4276	7.66765	293.372	0.254663	2.40989e+07	0.118367	140.341	31.3172	328.773	-1.20038	11.9436	12.5032	-0.0244469	2.86053	2.45377	3.93678	0.365576	0.275259	0.902863	0.796962	-0.513591	0.977874	0.300288	5.59922	0.0421217	4.65793	0.0655678	3.03228	6.11171	4.11472	9.4	0.268571	1.18857	4.14286	5.98694	32.1429	6.02857	203.8
11.nii.gz	-25.1111	30.9769	1.8628e+07	4.14625	28.4293	3.99028	61.5811	3.53986	18.0363	5.62622	-90.8969	152.478	12.1976	304.428	-0.379602	1.49024e+08	0.0684884	540.04	446.58	10621.4	-166.654	52.6627	21.5263	0.409921	3.7269	3.15538	6.77713	0.322459	0.227808	0.980086	0.90081	-0.337915	0.963837	0.230737	20.9447	0.011778	6.65237	0.0304539	4.54297	18.5473	5.84081	48.3234	0.240415	1.80075	13.7662	21.9206	429.92	7.52736	3358.44
110.nii.gz	38.8475	87.1996	1.95267e+07	4.08364	28.4901	4.67059	91.9396	69.1856	18.024	81.566	33.5507	146.704	13.7762	369.734	-0.690495	1.56214e+08	0.185185	581.103	402.929	14709.1	-71.0619	56.0392	26.5542	0.44582	3.97917	3.1842	10.1774	0.352413	0.262786	0.979398	0.905416	-0.28797	0.978071	0.296105	19.8561	0.120278	6.75725	0.154167	4.57882	19.4019	5.8085	36.5579	0.654321	2.63091	13.5053	23.464	400.437	10.7684	4699.62
111.nii.gz	5.67947	52.0603	428014	2	32.6683	1.66307	60.4215	26.3431	20.1432	20.0259	4.89889	55.5226	12.5251	327.114	0.514518	7.53304e+06	0.25	503.69	23.25	1314.78	0	19.625	65	-0.567493	7.25	0.5	4.625	0.167353	0.0803541	0.755484	0.663345	-1	0.960337	0.143351	5.75	0.375	1.5	0.375	0.5	21.1562	2	4	1	0	1	22.6875	55.75	1	55.75
112.nii.gz	-10.4506	68.9382	4.5882e+06	3.90983	48.5892	2.01174	81.1188	29.2707	23.7475	28.792	-23.0622	104.181	17.0332	330.519	0.00484084	3.67056e+07	0.0770975	823.731	171.319	13455.1	-177.713	74.8441	52.7871	0.204905	5.95275	3.15039	13.5938	0.239758	0.147769	0.912409	0.803817	-0.631768	0.995366	0.15534	12.8658	0.0303091	5.11874	0.0513745	3.86715	31.9078	4.38602	17.0476	0.405896	0.521542	3.2381	32.9365	161.381	3.14286	620.095
113.nii.gz	25.5159	78.9159	1.17763e+06	2.91398	16.8756	3.17327	79.7613	59.903	25.1949	76.7741	-3.08438	82.8457	9.08392	361.299	-0.793602	2.33171e+07	0.44	1006.75	216.5	2603.17	-60	33.1667	47.6667	-0.00967634	4	2.03734	25.1667	0.499346	0.425959	0.904084	0.854899	-0.588027	0.991612	0.264213	14.75	0.368056	3.45951	0.458333	2.3613	20.2083	2.91398	7.72727	0.702479	0.96	2.2	39.04	218.6	5.8	1605.8
114.nii.gz	0.310957	56.8388	634901	2.25163	25.8208	2.14822	65.2974	27.2444	21.9838	19.8405	-12.3119	77.6093	10.9369	328.287	0.263033	1.39678e+07	0.28	683.473	68.125	3437.37	-3.68721	36.1181	78.8542	0.0428974	7.47917	1.39624	19.3316	0.340776	0.266193	0.848064	0.760537	-0.579784	0.979438	0.0316913	8.88542	0.416667	2.27124	0.416667	1.39624	27.9839	2.25163	3.33333	0.555556	0.24	1.4	28.96	106.4	2.2	165.2
115.nii.gz	-49.1134	43.941	828721	3.16993	55.5871	2.04417	62.7285	0.882373	32.8935	-0.262093	-67.2679	129.996	23.8494	303.447	-0.162048	1.90606e+07	0.111111	1549.9	222.425	40585.2	-83.4109	141.583	94.2042	0.176824	8.0375	2.04339	29.2485	0.160671	0.0630466	0.901422	0.78738	-0.904146	0.997096	0.0926816	14.4604	0.108333	3.22672	0.108333	2.22672	58.9469	3.16993	9	1	0	1	60.9136	272.778	1	272.778
116.nii.gz	-7.69488	28.1848	4.764e+06	3.43263	21.9478	6.42203	41.8862	8.12602	13.2874	8.75231	-64.2541	106.14	8.65035	308.675	-1.38655	3.8112e+07	0.1088	338.399	256.849	3424.88	-127.454	26.0116	14.6127	0.282046	2.9469	2.66914	5.39946	0.373154	0.28786	0.97258	0.889556	-0.479552	0.973843	0.315042	15.932	0.0351499	4.96313	0.0653523	3.49726	10.1561	4.52108	13.84	0.2768	1.0624	5.44	13.4164	240.22	6.08	1533.1
117.nii.gz	-0.719202	66.1142	993467	2.72548	59.227	1.35199	73.4893	30.7151	30.256	19.4589	-15.8424	89.3317	26.2161	332.243	0.05441	2.18563e+07	0.160494	1012.69	144.875	13364.7	-240.309	75.7622	78.55	-0.0071709	7.05	2.02011	25.0444	0.241399	0.159602	0.850008	0.760546	-0.782283	0.988705	0.180477	12.0583	0.1175	3.15345	0.1375	2.20345	38.5781	2.72548	5.88889	0.654321	0.17284	1.44444	40.4691	149.556	1.66667	342.222
118.nii.gz	-4.22757	33.0955	2.06264e+06	3.02304	27.3986	2.10969	39.9359	13.0282	12.7445	8.06824	-16.9553	56.8911	10.0047	313.402	0.163214	3.63024e+07	0.133787	234.158	65.0695	1311.81	-21.5394	25.0782	12.6779	0.324823	2.93456	2.39863	3.95361	0.357322	0.270867	0.925306	0.8181	-0.528284	0.971574	0.325969	7.87188	0.0605317	4.21013	0.101671	3.12326	9.43902	3.21351	10.5238	0.501134	0.249433	2.80952	9.60998	59.9524	2.42857	194.524
119.nii.gz	-3.91488	56.7863	1.09454e+06	3.12193	46.2828	2.29207	61.2929	29.5528	25.8008	39.6598	-30.464	91.7569	19.8977	330.838	-0.705161	2.01395e+07	0.12	848.633	202.131	9297.41	-307.149	60.2275	62.1375	-0.073536	6.625	2.06798	17.325	0.206744	0.124638	0.88015	0.770727	-0.886352	0.996801	0.224379	14.225	0.103125	3.33048	0.103125	2.08048	30.5912	3.12193	10	1	0	1.2	36.24	215.8	1	215.8
12.nii.gz	-64.2727	-11.6757	1.14068e+06	3.33718	23.9388	2.87635	8.80618	-41.8916	17.3479	-44.7909	-80.0768	88.8829	11.5341	259.034	0.563309	9.12542e+06	0.107266	478.711	82.1225	6299.76	227.889	44.4365	15.7416	0.4726	3.29215	2.32549	3.94844	0.335949	0.234273	0.960301	0.860489	-0.701883	0.993869	0.207553	8.6521	0.0582583	4.20188	0.0905692	3.08478	15.0445	3.49923	8.05882	0.474048	0.366782	1.82353	18.6436	100.706	2.52941	218
120.nii.gz	51.8101	71.1444	1.448e+06	3.39275	54.4958	2.73235	99.9437	62.9731	30.9255	66.7126	46.5953	154.104	16.8749	363.107	-0.430374	3.47521e+07	0.25	1594.65	402.384	38573.9	0	132.97	95.6066	0.150149	8.40427	2.67091	24.1352	0.327083	0.241968	0.9164	0.799241	-0.805606	0.996924	0.437951	19.8093	0.375	3.90057	0.375	2.87626	57.1441	3.39275	9.61538	1	0.130178	1.30769	62.8994	381.385	1.46154	693.385
121.nii.gz	-20.4974	44.8158	1.24631e+07	4.29595	34.1344	4.17393	65.165	13.2669	21.6527	15.3754	-90.3845	155.55	14.6976	314.505	-0.948043	9.97048e+07	0.0588309	777.331	543.49	20294	-496.531	70.5267	32.5027	0.37084	4.34077	3.3539	12.3602	0.311012	0.221782	0.973115	0.891562	-0.401127	0.980635	0.232984	23.1043	0.0118044	6.58689	0.0278488	4.53491	25.7574	5.64274	31.2222	0.247795	1.70799	7.4127	31.4405	522.802	7.30159	4739.18
122.nii.gz	-24.7383	57.6567	3.15998e+06	3.86673	47.8353	2.89975	93.5596	11.914	30.0979	14.1401	-62.7994	156.359	18.3115	314.244	0.121235	2.52799e+07	0.0742188	1459.16	311.872	48908.3	-386.323	125.179	113.164	0.0640774	8.50716	3.15061	36.8232	0.202965	0.117176	0.913071	0.80839	-0.714453	0.996825	0.0992114	17.555	0.0419818	4.69688	0.0675214	3.46553	59.586	4.03891	13	0.40625	0.484375	2.375	59.0225	312.031	3.125	1143.03
123.nii.gz	-31.0846	33.5343	1.36472e+06	3.05656	31.838	2.53695	36.7614	0.515359	20.1138	1.38205	-56.5196	93.2811	13.1763	301.632	-0.493763	4.14876e+07	0.128889	672.087	176.08	10312.8	-183.912	70.14	31.8336	0.348627	4.53693	2.70064	10.1944	0.306509	0.217453	0.932914	0.829792	-0.600602	0.984942	0.190906	12.9007	0.0598697	4.12226	0.104482	3.07333	25.4934	3.24022	7.53333	0.502222	0.248889	1.93333	27.3067	186.067	2.6	558.067
124.nii.gz	4.48607	56.9948	1.88761e+07	3.90321	32.1044	2.68252	80.3272	29.75	18.7218	24.4204	-16.1347	96.462	13.0973	330.496	0.21341	1.51009e+08	0.15625	554.171	148.79	5224.74	37.2004	46.9237	38.2177	0.365461	5.15754	2.97243	9.96887	0.354759	0.264395	0.962821	0.869653	-0.216616	0.997768	0.292722	12.0159	0.136806	6.6938	0.164583	4.34022	21.2854	5.475	42.4348	0.625	1.72637	14.5435	21.3594	144.315	8.19565	1390.38
125.nii.gz	9.16894	60.3366	9.65486e+07	4.02208	27.0313	3.52885	82.8728	34.3945	15.7176	35.1736	-13.5957	126.745	10.9261	335.016	0.144876	7.72389e+08	0.083131	416.26	247.863	6170.12	87.5635	43.8621	14.9656	0.525349	3.02161	3.03126	5.97025	0.400787	0.31861	0.98173	0.910924	-0.131149	0.964456	0.316666	15.5122	0.0169493	7.28554	0.0374601	4.68307	14.7069	6.6149	136.24	0.26003	5.16351	70.5809	16.8646	253.486	19.1702	3177.5
126.nii.gz	-19.2191	65.8459	1.34548e+07	4.40511	42.1165	3.00808	86.2688	29.2321	25.0754	32.783	-62.3946	148.663	16.8151	330.739	-0.703985	1.07638e+08	0.0553242	994.544	441.802	29590.5	-685.703	96.1121	48.975	0.326034	5.39531	3.6433	17.9536	0.274857	0.18237	0.955986	0.863359	-0.420224	0.985374	0.170365	20.7291	0.0103247	6.76068	0.0244068	4.76728	36.2718	5.45227	31.5366	0.256395	1.43208	6.80488	40.0184	414.74	6.57724	3575.1
127.nii.gz	26.6684	52.8782	3.41035e+06	3.80769	29.8793	2.30575	56.6446	40.7106	15.5758	43.0539	20.0901	75.3795	10.991	340.965	-0.0779802	2.72828e+07	0.375	375.146	90.1448	1936.77	0	26.4544	35.9302	-0.00505051	4.96822	2.76315	9.44028	0.39375	0.294706	0.902321	0.791104	-0.583333	0.995468	0.152153	9.59597	0.5	4.58547	0.5	3.21001	15.5962	4.26083	15.2632	0.5	1.03601	3.15789	15.3241	100.158	4.05263	505
128.nii.gz	-28.3266	41.188	2.28933e+07	4.3197	35.0188	2.41977	65.1648	5.89982	20.4852	6.6185	-53.4484	118.613	14.6206	306.938	0.0174254	1.83147e+08	0.0558011	636.521	179.546	14484.7	102.811	77.8547	20.0871	0.58888	3.62018	3.18371	6.56156	0.320805	0.225638	0.970323	0.880589	-0.273883	0.950171	0.246315	12.8483	0.00695725	7.3888	0.0188354	4.96917	24.4855	6.06808	61.2387	0.252011	1.71309	13.5597	25.3026	187.21	7.46914	1400.55
129.nii.gz	22.6368	54.3672	688538	2.25163	24.9724	1.33494	55.2093	38.4848	12.8105	38.4506	20.5776	34.6318	10.5578	338.757	-0.0195044	9.63954e+06	0.222222	184.422	21.5833	285.03	-13.6878	11.5816	16.1042	-0.224988	3.4375	1.39624	3.27604	0.324008	0.231661	0.821631	0.724904	-0.916667	0.987709	0.257795	4.73958	0.211806	2.31291	0.239583	1.39624	6.92144	2.25163	3.33333	0.555556	0.222222	1.33333	7.88889	26.6667	2	27.6667
13.nii.gz	-43.9432	14.1463	3.54425e+06	3.80555	23.7151	3.09168	33.1283	-17.1298	17.917	-19.0078	-75.732	108.86	11.3349	283.815	0.17899	2.8354e+07	0.0836777	535.643	210.659	5736.32	-17.5282	41.2651	34.0593	0.0990862	4.74344	2.85604	9.4385	0.282962	0.190354	0.943974	0.841028	-0.646881	0.99336	0.19178	14.4294	0.038456	4.84905	0.0667467	3.45505	18.8311	4.39682	13.8636	0.315083	0.907025	3.68182	21.3161	191.5	4.72727	912.091
130.nii.gz	-23.0865	42.3267	3.23275e+07	4.31466	30.1981	3.21894	74.6421	11.0027	19.9668	13.5541	-68.5206	143.163	13.434	312.045	-0.49155	2.5862e+08	0.0600958	649.388	315.361	12939.5	-277.632	59.6709	29.3327	0.338771	4.21077	3.45332	11.1099	0.305035	0.211097	0.968705	0.881571	-0.219001	0.914769	0.22264	17.5424	0.00703375	7.46471	0.0195345	4.78135	22.2509	6.03812	83.6386	0.251923	2.03077	19.9518	25.8743	304.623	7.49398	2437.8
131.nii.gz	-15.3883	65.8686	1.06379e+07	4.39464	49.3707	2.63014	82.2006	24.5951	26.2688	22.5843	-62.5225	144.723	19.4704	326.158	-0.271745	8.51031e+07	0.0556	1016.91	408.679	25782.8	-347.632	98.321	58.4218	0.272584	5.97408	3.68238	20.781	0.254882	0.165319	0.945458	0.847266	-0.486347	0.991498	0.166263	19.9636	0.0123431	6.49014	0.0291343	4.66163	39.1857	5.52347	31.34	0.3134	1.1796	5.56	41.0664	381.1	5.1	1989.34
132.nii.gz	19.8759	62.3668	1.94079e+07	4.18697	41.3163	3.18473	88.083	34.1048	21.5385	34.4766	15.1902	145.184	17.7831	334.379	0.248703	1.55263e+08	0.25	632.902	412.5	11397.2	36.5625	58.6586	38.875	0.241618	5.625	3.53756	12.7983	0.278929	0.182043	0.964205	0.871972	-0.300352	0.992256	0.298505	20.1685	0.375	7.05291	0.375	4.66077	23.6577	5.56929	49.6897	1	1.41459	10.7241	25.0844	391.345	5.83908	2736.68
133.nii.gz	-26.2432	41.2679	2.4082e+07	4.20308	34.8203	2.34976	59.4482	7.5827	19.5928	7.11243	-47.7363	107.185	14.0525	308.522	0.038234	1.92656e+08	0.059601	578.466	153.189	13394.6	-22.2884	74.6225	21.1327	0.557699	3.59178	3.22635	7.73298	0.332495	0.238071	0.961546	0.869506	-0.257144	0.939828	0.241249	11.8235	0.00728615	7.34066	0.0200698	4.94508	23.9388	6.06593	57.9407	0.229015	1.95535	15.0791	23.1936	167.383	9.1581	1263.3
134.nii.gz	15.0279	54.5612	448521	2	31.509	1.23127	57.9126	34.3435	17.9835	33.2158	13.0298	44.8829	13.5255	334.858	0.0848147	6.90722e+06	0.25	344.55	20.75	37.5156	0	3.0625	35.875	-0.888128	5.125	0.25	3.0625	0.242659	0.162127	0.77304	0.692368	-0.916667	0.929873	0.293644	4.9375	0.4375	1.25	0.4375	0.25	9.73438	2	4	1	0	1	14.6875	42.25	1	42.25
135.nii.gz	-24.5758	29.5602	3.29015e+06	3.6416	28.4414	3.12004	40.538	1.4706	17.8928	5.67071	-58.1199	98.6578	11.7244	302.313	-0.58589	2.63212e+07	0.0925926	508.454	181.025	4697.92	-102.565	37.696	29.4548	0.170493	4.30648	2.77398	9.03114	0.304769	0.204337	0.943216	0.842999	-0.608064	0.990433	0.158035	13.3546	0.0420846	4.68202	0.0738587	3.3552	16.7877	4.21813	13.3889	0.371914	1.44136	3.33333	20.25	184.944	5.66667	1161.11
136.nii.gz	10.8237	32.8697	1.1008e+08	3.93973	25.5286	2.89778	67.4068	17.3148	14.8694	14.6551	9.72523	118.833	10.3836	317.41	0.879081	8.80642e+08	0.25	347.237	170.674	4670.79	41.5421	40.7087	12.0343	0.541343	2.75	2.92251	4.84622	0.402519	0.319761	0.98194	0.909742	-0.116161	0.960337	0.347014	12.7865	0.375	7.33646	0.375	4.67641	13.1857	6.69522	168.573	1	5.21159	87.4944	13.973	184.73	20.1979	3302.25
137.nii.gz	-8.53167	48.0695	7.12933e+07	4.25862	32.9206	3.48271	78.6959	16.9775	19.6136	16.9961	-35.5877	145.736	13.9256	317.92	0.0323749	5.70347e+08	0.107682	598.587	348.953	11323	83.1908	63.116	24.7371	0.510938	3.78452	3.3056	9.86157	0.406263	0.324418	0.980123	0.903539	-0.132129	0.969244	0.321834	18.4207	0.028137	7.43602	0.0549969	4.82323	21.9633	6.38329	134.246	0.238456	5.13967	52.2877	23.6842	344.21	18.1861	3419.59
138.nii.gz	-31.2742	51.1563	2.05803e+07	4.55698	48.1549	2.84535	87.1868	14.5104	28.3425	16.791	-76.9308	164.118	19.8621	316.077	-0.408855	1.64642e+08	0.0519112	1254.75	437.986	53457.4	-300.201	136.2	40.101	0.551744	5.04341	3.63246	15.1712	0.281129	0.18672	0.969015	0.881526	-0.33886	0.995334	0.183901	20.3343	0.0130254	7.31511	0.0303097	4.96387	43.8042	6.02352	59.7282	0.331612	1.44952	10.0971	50.7701	444.432	6.34951	2979.09
139.nii.gz	-18.1453	3.99077	345580	1.5	17.0749	1.3993	4.44946	-6.25836	9.94334	-4.21107	-21.0608	25.5102	7.13157	293.93	-0.293798	4.56166e+06	0.375	110.967	13.875	64.25	0	4.25	13.25	-0.527778	3.25	0.5	0.5	0.322917	0.201923	0.758811	0.673295	-0.916667	0.941102	0.0879167	4	0.40625	1.375	0.4375	0.5	4.375	1.5	2	0.5	0.25	1.5	4.5	20.5	2.5	74.5
14.nii.gz	-30.0218	38.0771	4.05851e+06	3.74095	28.8712	3.34534	52.0876	13.416	22.1601	24.1588	-61.667	113.755	15.2916	314.624	-1.07189	3.24681e+07	0.092207	758.592	300.203	18762	-670.25	69.3456	24.2528	0.483468	3.62329	3.09333	10.5078	0.350823	0.26362	0.96372	0.879964	-0.445986	0.979057	0.269516	16.9975	0.0248838	5.55643	0.0715774	4.09266	23.3996	4.18989	19.7805	0.482451	1.15883	3.78049	30.401	292.683	3.82927	1449.12
140.nii.gz	1.54001	59.5754	1.71422e+07	4.30357	41.6113	3.31829	79.6959	25.5682	23.2161	27.1217	-34.4105	125.498	16.3479	326.831	-0.379224	1.37138e+08	0.0874867	824.058	298.618	15813.6	-82.9298	75.8672	47.0028	0.374566	5.4734	3.48573	15.8713	0.378428	0.291879	0.968645	0.882317	-0.240707	0.99454	0.302903	17.0684	0.0164207	6.3537	0.0380118	4.36801	30.7175	5.67276	30.7037	0.346451	2.95321	14.1728	32.31	277.319	11.3704	2109.69
141.nii.gz	-59.7163	29.2246	2.56763e+07	4.68221	43.4868	2.57522	58.3804	-10.7495	26.4282	-7.55437	-97.6289	156.009	18.48	291.102	-0.315252	2.0541e+08	0.0448213	1074.34	316.701	41635.8	-335.511	130.572	48.6301	0.457546	5.05994	3.70408	21.9813	0.295261	0.205704	0.960452	0.87582	-0.329922	0.976697	0.210823	17.2085	0.00519727	7.85286	0.0149318	5.28999	44.8005	6.34672	72.8218	0.240336	2.28298	13.5809	43.6759	380.756	8.55776	3549.03
142.nii.gz	-13.7161	100.017	5.55767e+06	4.38162	60.4845	2.36606	138.896	44.6777	37.197	43.9441	-39.5286	178.424	26.3992	347.59	-0.0183251	4.44614e+07	0.0538752	2016.15	411.613	113128	-1139.74	219.733	107.588	0.346531	8.5582	3.52737	30.3506	0.182553	0.0958067	0.930356	0.821208	-0.75871	0.999234	0.097659	19.5705	0.0250443	5.39264	0.0408021	4.17444	81.8302	4.75161	22.913	0.49811	0.289225	2.47826	80.1078	382.565	2.34783	796.87
143.nii.gz	5.79159	108.316	1.73803e+07	4.26558	50.131	4.28736	120.885	56.1228	30.7087	61.8975	-38.8125	171.005	19.4906	358.212	-0.419979	1.39043e+08	0.125	1492.03	618.552	62025	-43.6164	134.405	97.674	0.445614	8.01308	3.48143	29.8628	0.345204	0.255675	0.968725	0.88158	-0.256212	0.998269	0.25276	24.6667	0.17804	6.67251	0.197378	4.37295	58.0199	5.48423	37.175	0.552686	1.91354	14.0875	60.7169	575.182	9.9875	2914.97
144.nii.gz	-12.26	66.9589	1.25063e+07	4.46812	47.5956	2.26068	91.9035	25.481	25.6111	25.4076	-41.459	133.363	19.011	326.943	0.00739158	1.00051e+08	0.0522317	953.838	260.846	23080.8	-119.888	100.061	50.9865	0.329686	5.75517	3.65746	16.3715	0.240074	0.14427	0.944611	0.841502	-0.448671	0.989918	0.15696	15.7633	0.0093758	6.85725	0.0214364	4.83891	37.7618	5.52153	42.094	0.359778	0.792899	6.11111	38.5033	250.368	3.92308	1013.19
145.nii.gz	-45.7684	33.1199	6.5851e+06	4.25608	54.6086	1.71791	52.1719	-5.15505	26.1182	-0.0312324	-52.0945	104.266	21.2813	296.313	-0.0255268	5.26808e+07	0.0588444	867.797	116.523	19227.7	42.3727	104.478	30.0928	0.555466	4.28709	3.20591	10.0616	0.313607	0.221059	0.946936	0.85007	-0.572538	0.995526	0.200884	9.88844	0.0180131	5.93915	0.0422132	4.42762	33.6426	5.01522	20.3867	0.271822	1.30916	4.41333	35.5822	145.133	7.13333	800.387
146.nii.gz	14.6179	80.1366	1.73238e+08	4.20694	42.7548	4.82509	101.383	51.0313	26.3683	52.1358	8.86729	201.672	18.3207	351.99	0.114158	1.38591e+09	0.0946502	1044.1	585.264	23372.8	181.756	91.7501	62.4504	0.570674	6.53157	3.09449	15.8709	0.388361	0.305027	0.990695	0.936095	-0.134671	0.997249	0.306067	23.961	0.0827364	7.65309	0.0940795	4.89532	38.5501	6.8968	271.413	0.654321	4.94781	128.004	41.7805	593.358	18.0651	10696.1
147.nii.gz	-3.78881	64.6027	2.89224e+07	4.08666	37.8292	2.97956	74.5525	24.8557	21.2203	27.5969	-13.7183	116.351	15.7138	325.863	0.26711	2.31379e+08	0.0828158	655.194	238.849	9795.33	51.335	62.9072	36.6813	0.48146	4.9191	3.41412	11.4335	0.388866	0.303423	0.958316	0.86534	-0.16033	0.990346	0.312685	15.2967	0.0203393	7.01044	0.0378485	4.58155	24.8971	5.77904	54.8182	0.315	2.27913	23.6853	26.2808	228.201	12.7622	1755.64
148.nii.gz	-23.01	60.5797	1.94072e+07	4.60553	42.8884	2.98121	98.8472	18.7611	25.8751	20.671	-79.1191	177.966	17.6459	320.443	-0.0317827	1.55257e+08	0.0485709	1074.75	449.049	39996.9	-32.1538	114.427	36.5662	0.512825	4.76287	3.57283	13.1808	0.285722	0.191813	0.973968	0.890042	-0.373251	0.982074	0.192104	20.7244	0.00721675	7.31091	0.0201259	5.10665	37.7482	6.00967	50.8942	0.269281	2.12855	9.17989	42.9776	453.63	7.2328	3331.28
149.nii.gz	23.2828	47.814	1.34346e+06	2.9183	49.7339	1.88729	50.5095	34.4184	24.2143	33.3277	14.5543	65.6106	19.9189	334.597	-0.081392	1.07477e+07	0.222222	697.782	64.75	5215.46	-1.87639	50.3889	61.75	-0.135703	6.58333	1.43872	14.7222	0.318201	0.222252	0.87501	0.764055	-0.832666	0.979237	0.32823	8.20833	0.225761	2.40077	0.237179	1.43872	28.0347	2.9183	6.66667	0.555556	0.222222	1.66667	28.1389	89.5	2	90.5
15.nii.gz	2.6949	53.966	1.17827e+07	3.85358	36.4779	2.55839	62.3329	28.0401	18.786	27.0183	-32.4675	94.8004	14.6886	328.783	-0.488476	9.42617e+07	0.0835788	487.914	186.373	3262.49	-120.514	26.0715	33.1077	-0.187582	4.94262	2.94326	6.06644	0.259034	0.162688	0.927996	0.813307	-0.462397	0.978094	0.158122	13.7082	0.0287644	5.46361	0.0663105	3.4988	14.7948	5.15262	29.3119	0.268917	1.83772	9.11009	19.5982	191.954	6.88991	1688.49
150.nii.gz	-0.173049	50.8373	1.59036e+07	4.09749	30.2846	4.23508	81.858	23.6049	18.6595	23.487	-61.8742	143.732	12.2014	324.533	-0.62229	1.27229e+08	0.075216	601.741	364.16	14006.5	-147.327	56.1167	18.0639	0.508296	3.21019	3.06867	7.52369	0.366283	0.278497	0.981381	0.909116	-0.322923	0.957599	0.277097	18.8314	0.0129754	6.52077	0.0322237	4.50546	18.5451	5.75682	31.1192	0.206087	2.58401	11.3576	24.3677	354.596	10.6556	3947.27
151.nii.gz	-18.0115	56.2174	2.04816e+06	3.88418	53.0365	2.2877	78.891	18.2388	29.0181	17.8392	-53.8413	132.732	22.0675	320.013	-0.194499	1.63853e+07	0.075	1132.22	266.655	17687.3	-132.706	83.369	82.0859	0.0192849	7.24588	2.33505	24.7008	0.21585	0.127465	0.911757	0.807015	-0.909205	0.998375	0.144247	16.3038	0.0903541	3.67246	0.104243	2.61817	41.3637	4.02193	14.7	0.735	0.26	1.5	44.5875	277.15	1.7	585.85
152.nii.gz	-26.8621	38.3617	4.92614e+06	4.00001	36.07	2.35768	56.347	6.71333	21.3573	9.12317	-50.6305	106.977	15.0343	307.788	-0.0361558	3.94091e+07	0.0754438	660.405	213.287	8567.4	-29.1779	60.008	32.9245	0.297361	4.67464	2.98398	9.46313	0.273193	0.173323	0.946399	0.842271	-0.583007	0.992741	0.169015	14.3545	0.0284285	5.26283	0.0477834	3.86934	23.2331	4.57997	17.1538	0.329882	0.763314	3.92308	26.9124	191.442	4.46154	1052.4
16.nii.gz	-32.4746	8.36876	3.15226e+06	3.43927	25.9308	1.92548	17.8381	-12.3956	13.265	-11.8062	-38.817	56.6551	10.2635	288.018	0.0392725	2.52181e+07	0.098338	237.845	43.9793	1409.96	-9.19094	27.4452	5.77513	0.646424	1.91499	2.22316	1.97323	0.45154	0.376292	0.963775	0.871272	-0.460059	0.976421	0.388577	6.20828	0.0313598	5.13864	0.0648576	3.80697	8.30509	4.1953	19.7368	0.519391	0.313019	3.73684	9.55194	45.8684	4.10526	195.868
17.nii.gz	3.40617	21.4781	2.25837e+06	2.262	13.2082	1.66061	23.4206	13.2713	6.34962	15.475	0.972049	22.4485	4.9359	313.353	-0.3129	9.03349e+06	0.217391	51.14	12.9364	44.3899	-4.55611	4.37966	3.04101	0.168448	1.36324	1.85658	1.0709	0.531885	0.479378	0.906351	0.807713	-0.244341	0.771364	0.472011	3.54943	0.0883967	3.75345	0.147467	2.56208	1.85517	3.53422	6.82609	0.296786	0.994329	5	1.99622	12.3478	6.30435	105.043
18.nii.gz	-3.12436	36.3427	1.95755e+07	4.18451	39.1384	3.72263	58.9896	12.3401	21.0981	12.6985	-41.6517	110.531	15.6923	312.764	0.144684	1.56604e+08	0.103877	644.272	243.374	6893.06	71.3696	42.5923	42.2286	0.776394	5.02836	3.42112	13.4611	0.531088	0.477609	0.99118	0.937554	-0.306097	0.972046	0.445443	15.5952	0.0246231	6.55194	0.0623537	4.27715	21.2052	5.89923	48.9034	0.236248	1.61161	14.4388	25.7395	244.551	8.58273	2200.28
19.nii.gz	9.99742	55.8182	1.0282e+07	3.68231	23.4298	3.51514	62.7928	33.8165	14.0611	37.071	-22.6362	85.429	9.01654	334.307	-0.840874	8.22562e+07	0.0926276	327.653	171.838	4111.46	-146.638	33.6213	7.60244	0.631637	2.05177	2.53721	3.28103	0.455117	0.382465	0.978683	0.904434	-0.310416	0.938777	0.377454	12.858	0.0201702	5.94688	0.0544939	4.26435	10.3059	5.08043	26.7609	0.290879	1.50473	8.52174	12.9537	163.283	6.04348	1154.48
2.nii.gz	0.251541	52.696	4.22275e+07	4.24636	42.6574	4.5355	78.3459	29.7453	26.365	32.5709	-33.511	150.767	19.4138	330.444	-0.322808	3.3782e+08	0.0727041	1010.23	434.117	21411.5	-86.8481	86.5781	106.507	0.273917	8.35956	3.33274	19.5951	0.308886	0.216376	0.9712	0.886316	-0.232421	0.992852	0.22504	20.7029	0.0239105	7.17509	0.0527436	4.57483	48.2711	6.113	90.3892	0.298044	1.75911	26.67	40.1352	418.18	8.50442	3828.31
20.nii.gz	11.2103	70.7424	6.04341e+06	4.26408	40.048	2.30249	83.5752	46.3705	26.4821	53.3925	-6.07264	118.671	19.1609	347.106	-0.582024	4.83473e+07	0.0873699	1011.35	286.929	12487.9	-274.963	52.0116	37.4751	0.484614	5.26857	3.03262	7.79279	0.378887	0.296272	0.956707	0.867862	-0.456447	0.994804	0.28315	16.7908	0.0914087	5.64347	0.0966649	4.02425	21.054	4.7961	30.1111	0.557613	0.722499	4.10638	40.7654	269.111	4.14894	792.872
21.nii.gz	5.8187	71.0387	1.04918e+07	3.77511	40.1507	4.03448	80.1052	48.3525	19.7554	55.7453	-21.7916	104.618	15.151	349.281	-0.490311	8.39343e+07	0.146822	648.053	260.086	32565.2	-42.5837	85.439	9.18349	0.815176	2.48691	2.63611	3.91118	0.524564	0.470474	0.983323	0.916941	-0.29263	0.991588	0.473096	15.5204	0.0488102	5.79768	0.0935208	4.36965	23.5207	4.89884	24.6977	0.396194	1.49306	10.8649	25.6555	258.395	7.81081	1911.65
22.nii.gz	0.256	26.8301	4.59904e+06	3.87065	32.9517	7.08337	41.5196	11.0296	19.3921	13.0198	-13.6358	94.8299	14.3743	311.291	-0.516285	1.83961e+07	0.177003	536.158	157.099	10162.1	-15.6824	63.4283	12.2163	0.676789	2.68324	2.6989	4.78571	0.606295	0.560782	0.981375	0.908216	-0.286894	0.987378	0.489969	12.0117	0.0713054	5.85083	0.193572	4.29404	18.9111	4.584	21.0784	0.413303	3.50928	8.31915	21.1496	152.275	14.1064	658.447
23.nii.gz	19.7197	50.9011	1.06816e+07	3.70896	25.1118	3.26115	67.5837	34.8263	14.5222	33.5862	10.8161	73.6006	10.2768	335.022	0.807025	8.54524e+07	0.130316	320.556	138.163	4006.16	103.222	36.6831	7.74085	0.809611	2.12925	2.53947	3.06505	0.571237	0.524887	0.98733	0.924781	-0.3507	0.959161	0.47599	11.4409	0.0367322	5.84199	0.0998526	4.18019	11.106	5.03453	24.1646	0.30588	2.15141	12.8384	12.9893	129.848	10.5556	1015.11
24.nii.gz	-11.2263	63.2671	1.04656e+07	4.25831	39.3888	3.32158	78.3667	30.553	28.8093	37.6689	-48.3658	142.436	18.2494	331.91	-0.800666	8.37246e+07	0.0737193	1351.51	448.413	107998	-474.165	173.146	33.3984	0.79668	4.28168	2.91607	14.1959	0.371401	0.283098	0.97972	0.906518	-0.537452	0.994755	0.265042	20.2409	0.0340865	5.79678	0.0761238	4.52761	47.9001	5.31834	31.8	0.43107	1.77795	5.8	54.5998	440.041	5.65263	2356.19
25.nii.gz	2.10378	54.9108	1.68564e+07	3.87526	25.8766	3.50914	69.7923	32.3786	16.4599	37.1452	-41.6501	111.442	11.3601	333.013	-0.828593	1.34851e+08	0.0798996	421.896	282.769	7717.18	-247.022	48.0326	8.46708	0.69511	2.09099	2.58864	3.89921	0.457616	0.390253	0.985177	0.921955	-0.310346	0.947629	0.406565	16.5187	0.0162261	6.34227	0.0424831	4.53658	14.1249	5.2781	41.9342	0.275883	1.38296	12.1447	17.1551	271.474	6.03947	1886.63
26.nii.gz	-17.9553	10.8554	4.99259e+06	3.92983	35.8806	4.89382	32.5994	-5.78988	18.9711	-5.28339	-38.5014	87.3085	14.1905	294.443	0.19796	1.99704e+07	0.193772	527.577	165.784	11528.6	-1.78173	65.5199	10.3507	0.724182	2.58384	2.6861	3.47318	0.553694	0.494998	0.983205	0.911384	-0.309833	0.98184	0.448652	12.3282	0.081535	5.92027	0.213691	4.38479	18.9676	4.62296	24.2131	0.396936	3.16263	7.76923	21.3287	154.902	11.4706	744.016
27.nii.gz	-15.5535	42.7295	1.15472e+08	4.19811	29.8547	3.01331	65.3634	14.2721	18.1508	15.7371	-59.4537	124.817	12.4895	315.101	-0.374467	9.23779e+08	0.0634252	521.391	263.634	9353.52	-183.603	53.1024	31.6893	0.268595	4.28754	3.35046	10.4577	0.321031	0.233622	0.958916	0.869892	-0.15041	0.801591	0.235934	16.0687	0.00626367	7.75084	0.0172629	4.79605	21.1979	6.41803	244.273	0.210037	2.26404	73.7635	20.9714	257.068	10.4772	3049.17
28.nii.gz	-2.07293	50.1318	4.86965e+07	4.58093	48.5733	3.5718	71.1289	19.6434	25.6501	20.1171	-21.7772	147.547	19.1832	320.102	-0.0601848	3.89572e+08	0.147639	953.769	354.787	36391	32.3493	121.151	16.7177	0.805971	3.23182	2.88738	4.6326	0.591783	0.552416	0.989255	0.930684	-0.2516	0.976174	0.515848	18.1033	0.0386361	7.41937	0.0756548	5.27565	33.8949	6.55075	106.86	0.254306	4.81238	26.911	38.4551	385.234	14.1111	4150.93
29.nii.gz	-34.7037	9.46524	6.39166e+06	3.4549	19.1718	3.70755	18.1842	-8.5678	13.1356	-5.006	-61.7589	79.9431	8.12366	291.928	-1.02095	2.55666e+07	0.115022	289.356	152.67	4498.92	-206.15	32.2988	6.15731	0.669049	1.79571	2.36419	2.80383	0.494455	0.4375	0.980353	0.911256	-0.35726	0.949979	0.444186	12.0878	0.0295685	5.47624	0.0634702	4.04961	9.61403	4.6855	21.1333	0.281778	1.35929	8.62667	11.3376	147.76	6.68	1083.09
3.nii.gz	-5.81227	72.692	4.21179e+06	4.10082	45.5481	2.05809	87.762	36.1544	24.5002	36.9744	-19.6181	107.38	18.5154	337.39	-0.219866	3.36944e+07	0.06355	832.504	187.812	14655.6	-240.75	80.8565	35.2135	0.398503	4.77572	3.14474	11.9043	0.274296	0.182895	0.938461	0.835015	-0.58893	0.995356	0.224105	13.28	0.0212383	5.6296	0.0436244	4.19114	29.0175	4.17527	22.4054	0.605551	0.3813	2.35135	33.1965	172.054	2.13514	504
30.nii.gz	-23.6838	29.6098	4.00843e+07	3.9632	26.3769	3.71048	44.9405	5.99907	16.9571	9.87319	-77.0676	122.008	11.7357	306.748	-0.908977	3.20674e+08	0.075426	459.079	340.243	5509.92	-148.406	35.878	19.0817	0.231302	3.29123	3.0924	7.09334	0.375689	0.29236	0.972235	0.89206	-0.191029	0.847502	0.273627	18.329	0.0116011	6.80013	0.0324285	4.39628	13.7399	6.25418	70.3568	0.165157	4.28028	32.1315	18.2261	331.333	15.6432	6142.72
31.nii.gz	-51.2348	24.2692	7.8531e+06	4.04662	37.0889	3.11258	32.975	-4.43059	24.5072	8.26608	-70.6328	118.275	17.4502	297.047	0.111618	6.28248e+07	0.104542	875.827	326.314	32215.4	75.6718	96.8038	14.8102	0.802926	2.78742	2.9367	6.8712	0.508579	0.442665	0.984138	0.915442	-0.417578	0.987515	0.382323	17.487	0.0317704	6.06244	0.0849469	4.39389	27.9035	5.1903	25.7416	0.312066	2.5434	7.13483	34.7726	311.303	9	2083.71
32.nii.gz	15.3017	58.9834	9.62911e+06	3.51006	50.1056	2.53372	64.88	38.198	22.5957	40.8183	-2.48466	76.8239	19.85	338.574	0.0241949	7.70329e+07	0.106399	593.688	95.5336	3497.87	-36.6366	31.2794	73.3963	0.534759	7.32121	2.65631	4.42853	0.440446	0.361337	0.962915	0.873506	-0.277538	0.983846	0.328779	9.52811	0.0539105	5.84149	0.128983	4.09449	26.1689	5.0269	23.4286	0.278912	3.92456	8.59524	23.6802	105.918	11.6575	1625.1
33.nii.gz	-0.778732	53.7916	7.12982e+07	4.29282	35.535	2.86726	84.852	26.5079	20.4104	26.9299	-31.5117	121.466	14.7242	327.192	-0.134126	5.70386e+08	0.0687083	625.332	233.683	10720.2	81.748	65.6682	35.4066	0.30887	4.24074	3.34043	15.0313	0.347768	0.261206	0.963466	0.880025	-0.188909	0.971554	0.26065	15.0356	0.0131051	7.37958	0.0341666	4.7063	25.2687	6.39843	129.441	0.252557	2.99302	45.7598	25.0207	238.108	11.6186	2442.05
34.nii.gz	3.93402	84.3161	2.18689e+07	4.25606	47.9529	2.4689	93.8449	51.1421	26.39	60.9301	-30.0499	123.895	20.1919	352.498	-0.740235	1.74951e+08	0.0641787	954.301	388.184	30783.7	-985.429	97.7755	22.5288	0.630399	3.39152	3.14524	10.1198	0.386431	0.310087	0.970571	0.894635	-0.397775	0.975609	0.302712	19.2144	0.0168414	6.33861	0.0500771	4.62057	30.0761	5.84107	38.5795	0.219202	4.48605	11.2955	38.1441	352.199	12.5568	6305.94
35.nii.gz	8.60501	59.5939	2.84564e+07	4.07998	38.1859	4.19822	74.3216	36.7309	21.7148	40.6432	-40.159	114.481	15.6532	337.38	-0.640502	2.27651e+08	0.082272	707.149	305.595	20329.7	-359.738	86.3834	12.7697	0.742068	2.81472	2.75517	4.55046	0.453377	0.380455	0.987226	0.924327	-0.272378	0.984662	0.372323	17.1549	0.0168058	6.59324	0.0464944	4.64157	24.7883	5.51695	68.64	0.395544	1.20614	20.568	28.3587	300.464	5.976	1976.38
36.nii.gz	2.30351	54.2764	2.77443e+07	4.35668	61.0776	3.71084	63.1906	30.2064	28.7559	33.1901	-19.1044	139.683	23.8242	330.853	-0.0297916	2.21954e+08	0.0873016	1033.97	337.126	13228.9	-60.4194	62.8476	80.443	0.607767	7.47242	3.18826	10.3699	0.371192	0.279859	0.984715	0.915103	-0.366038	0.994205	0.297708	18.06	0.0245261	6.39633	0.0492838	4.51363	35.8226	6.08845	69.0458	0.428571	2.0669	20.2549	41.8954	365.458	8.36601	3370.88
37.nii.gz	-17.2834	28.7478	2.71275e+06	3.34237	25.7259	3.18804	42.4607	10.6937	15.3403	16.1297	-40.6398	83.1005	10.6534	311.262	-0.814711	1.0851e+07	0.104592	353.499	154.338	4441.68	-191.842	36.6168	17.2755	0.353429	3.26063	2.72086	6.20777	0.341915	0.246899	0.954082	0.857906	-0.49122	0.979092	0.268346	12.2265	0.0357839	4.97064	0.0716536	3.49792	13.4731	3.92325	12.8571	0.459184	0.392857	2.92857	14.4592	148.357	2.64286	451.571
38.nii.gz	-25.0875	37.7953	2.24589e+07	4.12366	29.8202	2.73856	59.5022	3.14103	18.3671	0.291861	-46.0867	105.589	12.5667	304.012	0.414881	1.79671e+08	0.0648106	529.079	144.01	6665.54	17.7185	47.7327	18.0862	0.446852	3.29135	2.91769	5.82936	0.35012	0.260837	0.966573	0.878888	-0.385793	0.970519	0.286584	11.6809	0.0152979	6.31318	0.0346958	4.36894	16.4547	5.83428	64.7942	0.266643	1.16154	15.749	21.0191	144.202	6.41564	884.35
39.nii.gz	-16.9057	24.9254	1.04207e+07	3.58154	20.2038	2.92801	38.2004	6.00066	12.021	6.29348	-33.2081	71.4085	8.1538	306.398	-0.360798	8.33653e+07	0.0982875	243.406	78.5814	855.136	5.62391	15.7529	14.7617	0.00103982	3.0656	2.80166	4.92728	0.352174	0.259412	0.944334	0.8429	-0.354446	0.947583	0.285006	8.84916	0.0240635	5.60986	0.050149	3.60666	7.62866	5.12632	28.1712	0.253794	1.19601	10.9099	9.74401	85.3243	6.98198	603.973
4.nii.gz	-21.2514	24.9336	2.43178e+07	3.66896	20.2929	3.36626	36.4513	5.912	13.8831	10.3479	-49.9046	86.3559	9.29688	306.417	-0.91899	9.72713e+07	0.0956605	309.032	153.229	5526.68	-243.969	38.4535	5.25949	0.756347	1.65085	2.35759	2.46484	0.512638	0.456388	0.984887	0.921408	-0.260716	0.915893	0.435351	12.0383	0.0206131	6.21685	0.0593151	4.39457	10.9282	5.57634	58.7606	0.226875	1.6794	24.7761	12.5665	148.347	8.35135	1420.85
40.nii.gz	-15.7035	42.5625	5.89344e+07	4.08337	34.5389	2.30241	64.7112	16.0894	18.4022	19.0539	-44.883	109.594	13.8031	316.858	-0.332752	4.71475e+08	0.0658127	486.787	182.387	4577.66	-110.399	35.623	39.7319	-0.0627323	4.92357	3.31038	10.0657	0.310762	0.229106	0.931428	0.83394	-0.270505	0.935362	0.210182	13.5368	0.0109441	6.96191	0.0288403	4.26643	18.8387	6.431	104.881	0.178672	3.67977	38.632	19.4665	181.411	14.5911	3060.91
41.nii.gz	-60.1238	42.3334	3.4702e+08	4.96425	59.0827	2.33152	101.525	-9.56587	32.3688	-9.66422	-125.229	226.754	24.2217	293.008	0.0171354	2.77616e+09	0.0353416	1501.61	593.737	76629.9	293.401	174.576	55.2082	0.513579	5.66518	3.84541	19.804	0.270829	0.182083	0.976979	0.899257	-0.113551	0.755953	0.18483	23.7426	0.00210343	9.29827	0.00586619	5.7148	57.446	7.19036	919.703	0.227537	1.98512	142.851	60.2209	664.539	8.59772	4997.64
42.nii.gz	-54.2711	1.12311	3.18863e+06	3.32507	21.3401	3.40888	4.33539	-18.394	15.9688	-12.001	-76.83	81.1654	10.9951	282.34	-1.16697	2.5509e+07	0.115	413.839	186.411	8778.62	-417.315	51.8487	7.66233	0.738452	2.057	2.50562	3.32157	0.47012	0.403451	0.975572	0.899892	-0.451313	0.972285	0.377751	13.2423	0.039556	5.01921	0.112269	3.79721	14.8777	4.23418	11	0.275	1.71	4.6	16.54	182.95	6.55	1577.95
43.nii.gz	0.763232	48.7065	1.75748e+07	3.91584	27.5764	3.40428	78.1359	25.721	16.3135	26.7203	-46.7898	124.926	11.4099	326.364	-0.139023	1.40598e+08	0.077686	419.558	266.374	3519.4	11.7888	28.3568	22.6321	0.0126075	3.88357	2.9356	6.08094	0.313615	0.219203	0.968945	0.877177	-0.45189	0.975996	0.222015	16.2746	0.0230319	5.65576	0.0419134	3.79778	12.7472	5.53517	46.9758	0.284702	1.4231	12.8182	16.7313	262.176	6.47879	1721.51
44.nii.gz	12.5351	35.0146	1.2895e+07	3.58065	23.2108	4.81414	54.395	21.0754	12.999	20.0309	-7.84786	64.2024	9.36936	321.26	0.586258	1.0316e+08	0.156463	254.814	47.9416	1436.17	61.6711	21.9043	12.7332	0.440196	2.74465	2.84487	4.82134	0.474071	0.411698	0.969176	0.886826	-0.259608	0.971209	0.454664	6.82179	0.0483951	5.94679	0.10054	3.9355	8.65938	5.31033	29	0.330813	2.06247	13.0426	10.4002	58.5106	9.59574	399.773
45.nii.gz	-20.8231	64.893	8.81384e+07	4.69178	44.0034	3.01241	120.719	21.888	26.1268	22.8939	-88.7841	209.503	18.377	323.539	-0.23986	7.05107e+08	0.0447357	1065.53	556.423	36365.7	21.7355	113.019	51.7657	0.375738	5.22922	3.65757	20.8891	0.28734	0.197052	0.975088	0.899748	-0.25764	0.951359	0.203519	23.2603	0.00453624	8.09656	0.01357	5.25967	41.1962	6.61639	215.088	0.255449	1.57171	37.6675	42.716	565.181	6.86936	4138.91
46.nii.gz	-41.3593	14.6119	4.46195e+06	3.89834	35.9664	2.80629	24.0203	-10.6584	17.6203	-5.68453	-70.2249	94.2451	12.1534	290.151	-0.225786	1.78478e+07	0.103806	469.216	190.107	9817.09	-49.2092	61.4426	9.4879	0.732239	2.46062	2.55024	3.25702	0.462384	0.386978	0.977956	0.896066	-0.470618	0.987065	0.353221	13.3082	0.0356803	5.91143	0.0875916	4.40254	17.7326	4.53699	22.2075	0.41901	0.809689	3.90566	18.8281	196.774	5.29412	691.151
47.nii.gz	5.46386	61.9076	1.89633e+07	4.30024	41.511	3.19901	82.6419	36.2453	28.2959	39.4318	-38.6432	137.711	19.6056	336.976	-0.00665538	1.51707e+08	0.0788897	1208.2	259.429	54491.2	-66.2906	153.77	28.8287	0.714109	4.37111	3.23718	10.3961	0.415524	0.326872	0.980536	0.900468	-0.342527	0.994732	0.319533	16.0962	0.0178788	6.31947	0.0485669	4.8455	45.0468	5.54748	43.5269	0.405827	1.57446	11.9341	48.5143	267.617	6.61677	1924.41
48.nii.gz	-3.71562	53.1592	8.5821e+07	4.21775	36.5997	2.74502	94.4953	24.8576	19.2547	25.0115	-37.4136	131.909	14.066	325.704	0.0436235	6.86568e+08	0.0624999	550.398	197.479	9558.19	16.8016	57.3462	20.6705	0.454825	3.5142	3.15796	7.12669	0.347701	0.257957	0.974071	0.892115	-0.176709	0.852726	0.250764	13.722	0.00763253	7.5188	0.0219772	4.84035	19.5042	6.59504	136.098	0.168229	3.42501	50.5624	22.1134	203.713	13.7936	2761.07
49.nii.gz	-17.2166	44.0267	3.67052e+06	3.63256	29.4796	2.32934	52.685	9.98703	18.1753	9.00243	-32.7074	85.3924	12.998	310.793	0.165343	1.46821e+07	0.0844875	500.546	114.679	8602.95	-19.2364	59.397	19.9691	0.497147	3.4773	2.9196	6.90725	0.354778	0.265679	0.947388	0.85139	-0.494608	0.985591	0.243045	10.2382	0.024458	5.46637	0.0433519	3.97266	19.8415	3.95794	15.1053	0.397507	0.457064	3.21053	20.4051	109.658	3.47368	408.184
5.nii.gz	17.385	87.5916	6.26679e+06	3.88058	49.8786	1.71165	96.7955	49.3982	25.4317	54.1936	-2.47183	99.2674	21.2616	350.54	0.0757794	5.01343e+07	0.0803537	799.061	134.973	5413.54	-72.7034	37.9925	90.9528	-0.373589	8.40973	2.61061	8.20592	0.18629	0.107839	0.842747	0.732899	-0.653247	0.992953	0.10557	12.1592	0.0530754	4.54523	0.0909462	3.17161	32.2363	4.54478	19.9412	0.391003	1.01346	4.09804	31.4102	160.745	4.05882	557.294
50.nii.gz	10.4601	53.2056	8.77354e+06	3.58432	23.7307	2.64218	67.5987	34.9786	13.5677	37.0786	-5.23014	72.8289	9.78242	335.382	-0.446228	7.01883e+07	0.0920447	270.634	98.7566	1666.89	-63.0391	24.6295	13.6891	0.276916	3.00887	2.61945	4.30701	0.355323	0.260329	0.952729	0.851997	-0.498566	0.974479	0.264614	9.79082	0.0367324	4.99013	0.0610786	3.3605	9.57967	4.97254	21.1795	0.271532	1.59895	7.17949	11.0703	101.077	6.46154	724.59
51.nii.gz	-14.4845	57.4506	4.62145e+06	3.86767	50.8027	1.94874	60.8119	26.6663	23.7524	35.9188	-27.4882	88.3	18.13	327.835	-0.57112	3.69716e+07	0.0730124	764.804	176.665	16490.7	-587.803	82.1247	23.9208	0.541843	3.78657	3.08785	8.88823	0.324627	0.238754	0.944213	0.847943	-0.506789	0.988949	0.298381	12.73	0.0216532	5.67227	0.0444922	4.17154	26.5114	4.24592	21.6977	0.504597	0.289886	3.13953	30.3061	170.977	2.30233	355.209
52.nii.gz	-11.5085	46.3094	3.91122e+07	4.17351	34.8152	4.49763	66.0887	15.7827	21.5266	22.313	-58.8782	134.762	15.1873	316.868	-0.619841	3.12897e+08	0.0803566	686.831	382.139	13610.9	-204.706	66.5075	26.847	0.400134	3.71986	3.16743	11.2604	0.365954	0.280779	0.977913	0.901152	-0.184379	0.981755	0.27761	19.4311	0.0152361	6.89048	0.0466253	4.53594	23.3386	6.10803	66.6522	0.213123	3.84391	31.4194	27.7689	364.11	13.399	5533.2
53.nii.gz	25.1614	77.0991	9.82997e+06	3.84857	27.0867	3.17984	86.4746	49.9752	15.6747	49.9624	-4.52197	90.9966	11.0095	350.535	-0.528062	7.86398e+07	0.079375	392.006	153.792	2896.9	-92.9923	30.8999	21.5927	0.191153	3.78999	2.83158	5.7059	0.310772	0.214693	0.947737	0.84475	-0.514989	0.983982	0.23211	12.3054	0.0277481	5.36178	0.0470495	3.72008	13.1231	4.99519	25.175	0.314688	0.825	6.35	15.4736	148.588	4.825	715.188
54.nii.gz	0.238733	68.0265	1.29805e+07	3.97886	41.5434	2.96358	76.0836	33.3344	21.0061	34.7396	-13.3024	89.3861	15.7533	334.269	-0.114357	1.03844e+08	0.0927456	624.167	144.356	5896.43	34.8284	51.2475	31.8968	0.243435	4.68851	2.8679	8.05778	0.39067	0.305995	0.950684	0.860796	-0.316688	0.997513	0.299418	11.7857	0.0475334	5.84425	0.0689622	3.77108	20.7861	5.30641	26.1667	0.549388	3.92332	12.2424	25.4367	128.314	12.7424	880.432
55.nii.gz	10.0914	40.5656	1.05788e+06	2.64644	25.0539	1.51892	46.1971	24.9816	12.0913	22.8294	8.25027	37.9468	10.3707	325.251	0.231043	8.46306e+06	0.18	175.227	24.1845	410.072	-2.65401	14.0105	14.8786	-0.0421164	3.21905	1.97256	4.10283	0.336022	0.239688	0.864525	0.759075	-0.67337	0.982789	0.254059	4.93571	0.0962415	3.42333	0.131548	2.33761	7.22228	2.92193	5.2	0.52	0.24	1.8	6.84	26.2	2.2	58
56.nii.gz	-23.4063	15.3527	706711	2.5	17.8056	2.01371	15.7759	-3.14978	11.9211	-2.16565	-28.613	44.3889	8.4967	297.219	-0.346465	2.82684e+06	0.1875	218.786	41.9917	1023.99	-59.4909	19.0224	19.4708	0.0236673	3.82083	1.56554	3.57743	0.279306	0.172331	0.857339	0.741679	-0.767593	0.986256	0.201117	6.48542	0.137917	2.9072	0.172917	1.9572	9.62332	2.5	5	0.625	0.1875	1.5	9.35938	43.875	1.75	118.875
57.nii.gz	1.40444	66.6465	1.29151e+07	3.99365	35.1678	2.52337	76.8469	38.6563	20.6229	44.7929	-19.8462	96.6931	14.6283	339.579	-0.684664	1.03321e+08	0.0695153	625.62	182.907	9064.77	-319.238	51.8605	30.4843	0.275632	4.14102	3.2906	11.5954	0.324446	0.234696	0.939031	0.845163	-0.351114	0.965266	0.236958	13.3241	0.0140438	6.37188	0.0358456	4.37221	20.5862	5.46795	26.7857	0.239158	2.33929	7.78571	24.681	173.652	8.58929	1882.83
58.nii.gz	-13.7153	25.4665	5.48513e+06	3.62266	21.8379	2.90748	48.1413	7.06708	13.3268	7.22079	-30.4336	78.5749	9.15178	307.524	0.0650591	9.65382e+07	0.0945303	280.963	76.8878	3328.03	16.7171	34.9886	13.176	0.451754	2.89072	2.8553	4.53979	0.371935	0.28081	0.959384	0.864459	-0.370435	0.964964	0.278028	8.45137	0.0198658	5.88994	0.0521848	4.13009	12.0411	4.42705	21.8276	0.376338	0.838288	5.48276	11.9587	90.1897	3.93103	342.603
59.nii.gz	39.889	85.5156	936971	2.80735	64.5973	3.12895	92.5977	65.1595	43.6302	73.6267	17.7009	135.208	36.0715	365.859	-0.739616	2.15503e+07	0.160494	2533.56	365.592	101830	-81.1641	176.077	193.983	-0.0374187	10.325	1.96006	75.3608	0.294742	0.18638	0.954319	0.84547	-0.808049	0.992321	0.294629	19.1625	0.254167	3.10172	0.254167	2.04339	92.5152	2.80735	7	1	0.17284	1.44444	100.025	408.222	1.66667	408.889
6.nii.gz	-4.73265	48.7451	6.88642e+06	3.98588	32.5097	2.65208	62.7694	19.8364	18.1909	19.8337	-10.3966	103.277	13.0701	320.597	-0.125496	5.50913e+07	0.12875	487.018	204.134	8811.74	-36.9749	61.9139	8.0393	0.767895	2.17718	2.49777	3.13124	0.502942	0.444766	0.984293	0.914716	-0.390976	0.98423	0.454188	13.8079	0.0423593	6.04575	0.097835	4.55456	17.4883	5.01736	20.9403	0.312542	1.36	5.15	19.35	199.791	6.2	912.925
60.nii.gz	-34.8939	80.3612	4.3235e+07	4.8997	61.1895	3.00093	102.61	24.3203	36.7146	28.1085	-85.2991	205.506	26.2232	327.53	-0.323943	3.4588e+08	0.0502397	2092.04	862.489	145011	-72.0976	201.757	92.1047	0.475521	7.55841	4.04756	32.7201	0.311481	0.220856	0.972803	0.891688	-0.22037	0.995032	0.226292	28.8878	0.00746847	7.96143	0.0169611	5.16593	73.4653	6.49099	103.59	0.372551	2.11569	23.1605	83.2561	777.579	8.83514	3703.62
61.nii.gz	8.08677	45.0728	986958	2.41938	13.3929	2.88454	65.419	30.6965	13.0824	31.3235	1.75162	63.6674	7.84283	331.153	0.205211	1.73705e+07	0.209877	301.83	47.35	481.023	1.45452	13.3922	17.6	-0.177699	3.08333	2.10345	7.73889	0.442259	0.377099	0.92644	0.841458	-0.555358	0.937599	0.272074	6.94167	0.139861	2.97845	0.225	2.20345	7.74806	2.41938	3.22222	0.358025	0.765432	1.88889	12.6667	57.1111	4.33333	251.778
62.nii.gz	11.8319	34.9343	743742	1.95021	15.1913	1.72507	35.2791	25.8178	8.27297	28.6764	10.6095	24.6695	6.41838	325.958	-0.612673	1.30899e+07	0.265306	91.6857	17.2	21.5187	0.902519	3.41222	6.03333	-0.211096	1.96667	1.37296	1.62889	0.444444	0.376727	0.877866	0.778066	-0.64035	0.941161	0.443898	4.19167	0.189722	2.48963	0.2375	1.52296	2.36139	1.95021	3.57143	0.510204	0.244898	1.85714	3.34694	17.1429	2.71429	52.2857
63.nii.gz	24.3921	79.1678	3.6394e+06	3.66375	34.1657	2.13193	79.6986	51.2069	19.9864	57.9503	11.343	75.4932	16.6923	351.912	0.0098504	2.91152e+07	0.206612	495.992	93.0179	3688.54	-45.0585	38.7515	36.2619	0.215607	4.77381	2.63197	11.2885	0.342896	0.254099	0.920737	0.812179	-0.557132	0.995507	0.240022	9.6369	0.113733	4.62443	0.175595	3.18165	18.0194	4.1607	13.5294	0.397924	0.628099	3.23529	18.7769	93.3636	4.27273	595.182
64.nii.gz	-19.6556	61.8559	2.20359e+07	4.45663	41.9847	3.53371	73.9699	23.9503	27.2679	34.8595	-66.681	153.014	18.8303	325.714	-0.908939	1.76287e+08	0.0654422	1145.93	527.542	47994.1	-773.365	109.01	46.3665	0.464639	5.01288	3.62457	19.2858	0.354585	0.271796	0.968971	0.891003	-0.307071	0.97725	0.278088	22.6225	0.0107916	6.98936	0.0308212	4.81766	38.844	6.06552	40.8452	0.243126	3.27175	13.7429	45.6658	498.494	11.8762	5692.16
65.nii.gz	3.89787	48.276	3.86757e+07	3.88383	21.4631	6.72681	72.4839	24.8613	14.7723	27.2311	-71.1723	143.656	8.97128	325.516	-1.28733	3.09406e+08	0.0854269	426.056	440.117	9705.25	-223.614	37.5618	16.7753	0.382469	2.92225	3.03793	8.00156	0.396025	0.313725	0.983092	0.917251	-0.177814	0.854285	0.306482	20.8544	0.0115382	6.85699	0.0323833	4.43736	13.5843	6.21235	53.7562	0.147277	4.80057	31.1808	16.9566	436.589	17.4274	7642.95
66.nii.gz	-7.55285	69.9873	5.84145e+06	4.18325	40.9284	2.16268	84.7509	33.9497	23.9995	38.1436	-25.8164	110.567	17.485	335.165	-0.276048	4.67316e+07	0.0606509	813.097	218.222	16612.2	-352.423	77.5751	58.9737	0.13623	6.14176	3.36151	18.4172	0.23428	0.137948	0.913251	0.807361	-0.638435	0.997023	0.137241	14.6063	0.0228028	5.54483	0.0448379	4.02205	34.1372	4.73381	21.5	0.413462	0.751479	3.15385	32.4567	208.019	3.61538	853.865
67.nii.gz	1.105	19.4964	1.24627e+06	2.35353	14.8523	3.67702	22.9065	9.45125	8.40026	10.898	-16.8474	39.7539	5.43446	309.624	-0.964782	2.19344e+07	0.218935	107.193	43.6027	101.126	-7.72572	5.42339	4.78125	-0.0187594	1.74058	1.71195	1.6859	0.465832	0.397929	0.949239	0.849765	-0.419185	0.913563	0.443418	6.58705	0.0930448	3.5216	0.125992	2.52232	2.55116	2.77736	6.23077	0.47929	0.331361	2.84615	4.02367	42.8462	3.46154	157.462
68.nii.gz	5.84974	62.511	1.11985e+07	3.94329	26.7395	2.32937	77.2067	34.027	16.5565	33.9672	-7.22608	84.4328	12.0292	334.642	-0.0230563	8.95882e+07	0.0738	411.223	115.97	4247.49	-46.145	41.7143	18.6887	0.378085	3.45012	3.03257	6.52432	0.331441	0.235134	0.950204	0.850601	-0.368191	0.969565	0.245162	10.4935	0.014501	6.31317	0.0391049	4.35964	15.1007	5.20472	25.5	0.255	1.83	7.38	16.3939	103.07	7.12	928.87
69.nii.gz	-15.0042	43.409	5.72137e+07	4.19071	28.8036	3.64229	81.3481	17.3298	18.4733	21.2371	-74.7005	156.049	12.209	318.219	-0.667781	4.57709e+08	0.0672159	564.971	390.505	11979.4	-247.623	54.0429	19.3304	0.465556	3.21828	3.16395	8.59799	0.372885	0.288611	0.982576	0.9145	-0.170773	0.856779	0.296168	19.5399	0.00834935	7.38287	0.0250928	4.77126	18.3433	6.47224	93.9664	0.166312	3.56853	37.977	22.8938	382.281	14.0478	5908.42
7.nii.gz	-0.132715	36.1803	4.14962e+06	3.1825	29.4575	2.76262	39.7559	17.8694	17.8981	21.5975	-14.841	77.1648	13.4313	318.136	-0.480708	3.3197e+07	0.142012	434.305	155.196	5975.96	-34.2505	41.6563	19.4149	0.385468	3.20392	2.61849	8.73768	0.420981	0.343118	0.949196	0.85178	-0.318936	0.960889	0.398984	12.2321	0.0526573	5.09123	0.10094	3.48866	15.2678	4.16195	15.8293	0.38608	0.9768	4.85366	17.3033	146.038	5.23077	991.038
70.nii.gz	-19.7719	34.8958	1.63805e+06	3.17512	33.0531	2.09596	45.0222	9.72154	16.9986	15.586	-27.9633	72.9855	12.0471	310.412	-0.266296	3.60371e+07	0.121107	428.454	92.8547	3199.21	-106.574	36.794	26.5087	0.13997	4.26553	2.44975	6.50585	0.273349	0.182909	0.915089	0.805076	-0.622563	0.989107	0.285577	9.49812	0.0534623	4.28796	0.0752914	2.99552	15.8257	3.33718	13.4706	0.792388	0.103806	2.05882	17.0519	91.8235	1.35294	134.529
71.nii.gz	7.76458	45.0296	1.91528e+07	3.8198	29.5324	3.15489	69.0925	31.2971	15.6754	36.1971	1.01976	103.07	10.6938	331.81	0.0723754	1.53222e+08	0.159763	346.898	187.034	3575.88	-59.533	34.3502	25.2431	0.331341	3.94444	3.05945	9.15664	0.362585	0.2751	0.965192	0.876888	-0.213566	0.985908	0.306061	13.5175	0.0859857	6.68323	0.130208	4.3754	13.0486	5.73535	42.8519	0.573964	2.67558	17.9722	13.9125	181.231	11.5648	2305.81
72.nii.gz	-32.0231	27.1966	1.13426e+07	4.00078	38.9755	2.20996	37.9736	0.287858	20.5012	6.65939	-57.2193	95.1929	15.7313	301.233	-0.51102	9.07411e+07	0.069312	568.289	143.631	5111.61	-180.051	37.295	55.1824	-0.161665	6.38979	2.98913	5.88597	0.223816	0.134811	0.88873	0.774224	-0.493327	0.986549	0.130436	12.1555	0.0204046	5.83893	0.0412849	3.87688	23.1193	5.50364	34.472	0.275776	1.1849	8.664	22.8892	179.84	5.816	1130.34
73.nii.gz	-55.7227	33.9782	1.55448e+06	3.52193	35.2358	2.48775	36.2624	-22.9733	25.1133	-29.6929	-71.4454	107.708	17.7296	278.79	0.523096	1.24358e+07	0.1	980.176	138.955	28000.6	507.857	104.816	20.7654	0.650105	3.66795	2.67247	5.91883	0.336878	0.244875	0.963993	0.871093	-0.660443	0.993865	0.223122	10.8583	0.0451479	4.58828	0.0826923	3.43873	31.3953	3.72193	8.4	0.42	0.44	2	39.3475	159.25	3	432.15
74.nii.gz	-69.831	-35.4614	846012	2.84237	18.2661	2.00092	-30.1695	-54.5297	10.9136	-55.1199	-72.904	42.7345	7.43967	245.824	0.393009	6.76809e+06	0.153061	173.724	20.3792	366.726	25.7919	11.5809	8.77153	0.163017	2.43681	2.10686	2.16173	0.387184	0.292952	0.913175	0.803183	-0.575277	0.978079	0.300995	4.43507	0.0704552	3.896	0.0961806	2.54864	5.08811	3.03915	6.14286	0.438776	0.387755	2.14286	6.22959	27.7857	2.85714	73.2143
75.nii.gz	-76.4067	-7.76882	614549	2.9477	48.946	2.08443	-7.30254	-40.4032	25.7765	-31.0141	-97.823	90.5204	19.7135	261.311	-0.61593	2.4582e+06	0.135802	892.726	180.225	17341.1	-490.096	94.3681	27.4417	0.573871	4.30833	1.30345	4.96806	0.27123	0.167766	0.935823	0.827607	-0.861383	0.995402	0.198886	12.7792	0.115972	3.16178	0.133333	2.12011	30.4524	2.9477	5.88889	0.654321	0.17284	1.22222	36	188.111	1.66667	428.778
76.nii.gz	-61.0437	-21.7453	906626	2.87314	18.3428	2.98515	-13.4975	-36.4227	13.0296	-32.7915	-72.6506	59.1531	6.49778	264.084	-0.906251	3.62651e+06	0.147929	267.494	70.9826	1791.7	-85.7593	26.001	10.8874	0.421786	2.78621	1.94775	2.50145	0.344611	0.244736	0.943398	0.833492	-0.674538	0.987654	0.292061	8.19717	0.0787751	3.74482	0.110367	2.61535	9.2221	3.08506	7.46154	0.573964	0.213018	1.92308	10.4852	78.2308	1.92308	180.231
77.nii.gz	-29.3677	14.0895	1.87118e+06	3.48171	22.282	1.96863	20.072	-8.86337	14.8066	-9.4092	-40.8484	60.9204	10.6774	291.64	0.0783985	1.49695e+07	0.103306	293.304	76.0025	2108.18	-26.3333	33.0364	13.4847	0.420114	3.02991	2.53085	3.86061	0.336725	0.243368	0.940746	0.833676	-0.601762	0.991357	0.314944	8.43223	0.038254	4.7636	0.0559261	3.39174	11.6303	3.78875	11.8182	0.53719	0.231405	2.27273	11.9256	71.6364	2.09091	170.091
78.nii.gz	-36.0994	10.0479	1.02033e+07	3.78964	19.7944	3.23026	34.889	-13.7065	13.7967	-13.6174	-52.0081	93.9143	8.97568	286.853	0.0099289	4.08132e+07	0.198853	320.717	105.835	5038.07	9.93611	40.6593	5.67137	0.751193	1.87126	2.36858	2.01103	0.597895	0.564536	0.985023	0.914629	-0.195179	0.949066	0.524787	9.85316	0.0564624	6.24948	0.108091	4.51546	11.5827	5.15079	35.4032	0.28551	1.65627	15.3117	12.8603	107.452	10.1948	567.226
79.nii.gz	-6.24512	56.1519	1.59416e+06	3.64022	49.7711	1.5897	68.5625	24.9313	23.9616	20.3381	-14.748	83.3105	19.0981	326.002	0.0354521	1.27533e+07	0.0844444	696.823	98.9938	6717.91	-57.471	60.3325	32.225	0.297327	4.775	2.72895	8.2375	0.24961	0.15182	0.9093	0.795827	-0.788361	0.997883	0.211861	9.5875	0.054375	4.21645	0.065625	3.14145	23.1394	3.64022	11.5333	0.768889	0.115556	1.26667	26.1067	100.067	1.4	167.667
8.nii.gz	-5.89003	56.4916	1.26198e+07	4.10043	31.2973	3.00619	83.4498	31.7026	20.8834	40.4077	-33.7917	117.242	13.9647	332.716	-0.743571	1.00958e+08	0.0767929	673.222	222.978	11965.2	-403.262	55.1508	20.6171	0.463588	3.42008	3.05907	7.96741	0.363455	0.277774	0.967984	0.884753	-0.419245	0.977028	0.268775	14.6388	0.0200908	5.96136	0.0498451	4.18024	18.942	5.35049	27.7544	0.24346	2.47799	8.75439	27.3136	219.404	8.77193	2330.68
80.nii.gz	-20.5054	16.9668	5.74898e+06	3.46467	33.9084	3.03044	36.7806	-0.831833	16.9677	2.68072	-33.3974	70.4608	12.3583	299.551	0.182614	4.59918e+07	0.132812	395.005	71.9394	4101.18	21.4729	45.708	13.0239	0.543503	2.93144	2.64104	3.62762	0.40453	0.326698	0.966781	0.871504	-0.425406	0.99088	0.459875	7.98542	0.145917	4.8832	0.172505	3.50907	14.683	4.56653	23.5538	0.379813	1.07804	6.53846	15.9844	74.125	4.26154	366
81.nii.gz	-48.5587	-14.2258	1.08218e+06	3.00624	18.7277	1.94886	-9.51189	-31.7109	10.721	-34.2191	-52.0607	42.5488	7.53039	268.599	0.130608	4.32872e+06	0.137778	166.38	35.7787	511.767	0.496939	16.1056	10.9931	0.203168	2.85354	2.10451	2.27706	0.331471	0.22866	0.909682	0.79112	-0.615728	0.981546	0.286523	5.8709	0.069998	3.9252	0.109533	2.61245	6.77466	3.00624	9.13333	0.608889	0.195556	2.06667	7.04	36.2	1.8	70.2
82.nii.gz	-18.3584	39.7034	7.4112e+06	4.17897	35.834	3.38329	53.3532	5.17433	21.4014	2.71493	-24.2181	121.702	15.6143	306.288	0.662911	5.92896e+07	0.16	681.265	281.73	8887.26	35.99	53.0349	18.8896	0.422176	3.50816	2.74761	5.96484	0.394507	0.312864	0.971726	0.883881	-0.621837	0.992376	0.369538	16.5229	0.156183	4.90105	0.189866	3.59952	17.9811	5.26866	24.0127	0.504132	1.45425	5.17722	27.2354	268.861	5.60759	1495.49
83.nii.gz	-54.4101	-17.7523	633470	2.72548	28.3669	2.01334	-12.7475	-35.1934	13.7566	-32.1658	-64.7974	52.0499	9.81317	265.303	-0.432459	2.53388e+06	0.160494	263.086	51.7917	897.869	-40.8825	20.6701	19.25	0.0116733	3.70833	2.01103	4.30903	0.287723	0.182365	0.879991	0.766155	-0.74883	0.989411	0.224657	7.16667	0.107639	3.25081	0.125	1.95915	9.98003	2.72548	5.88889	0.654321	0.17284	1.44444	10.6914	53.6667	1.66667	59.6667
84.nii.gz	-40.3274	-22.8976	870000	2.18872	9.77768	1.66073	-22.0897	-30.8193	5.79851	-31.8292	-40.8114	18.7217	4.10751	269.258	-0.135596	3.48e+06	0.236111	41.7578	11.5196	23.1233	-0.345138	3.40133	3.31607	0.0117557	1.51964	1.29336	0.955855	0.472798	0.412763	0.896847	0.78441	-0.476468	0.930872	0.528869	3.3875	0.10956	3.27345	0.152679	2.22345	1.67935	2.75163	5.5	0.458333	0.416667	2.83333	1.85417	12.4167	2.66667	46.0833
85.nii.gz	-69.5142	9.70269	2.54664e+06	4.02895	43.6198	2.22452	19.7368	-23.9718	26.9095	-13.6224	-94.6789	114.416	19.7524	277.797	-0.539504	2.03732e+07	0.0707071	979.452	308.227	9987.53	-239.046	49.1102	26.9903	-0.00477688	4.17504	2.21089	7.07219	0.281748	0.186823	0.954922	0.856617	-0.750449	0.984861	0.268016	17.3219	0.109938	3.89638	0.124823	2.60985	19.0251	4.41546	17.7273	0.53719	0.292011	2.33333	39.7741	256.667	2.15152	632.485
86.nii.gz	-6.45453	44.7857	2.98627e+07	4.0739	29.3988	4.82604	76.1138	20.6518	17.6761	23.5686	-72.6909	148.805	12.2261	321.452	-0.886522	2.38902e+08	0.0712515	513.71	416.932	6347.15	-101.356	37.9711	25.0071	0.181915	3.77178	3.28626	9.96921	0.335983	0.247283	0.976252	0.898724	-0.226446	0.909547	0.261024	20.3382	0.0103236	6.95279	0.0301197	4.45059	15.7446	5.94994	64.654	0.223716	2.49999	20.5917	20.5515	405.879	9.14533	4267.82
87.nii.gz	-2.85715	37.1085	996379	2.44644	18.1831	1.85074	38.6501	15.3228	12.6885	9.66475	-4.60067	43.2508	10.3479	315.655	0.338602	3.98552e+06	0.2	209.485	27.7929	453.941	-6.45764	14.7747	19.0667	-0.144717	3.65476	2.06968	5.58991	0.313897	0.212545	0.837369	0.736988	-0.633116	0.975175	0.198764	5.37262	0.108288	3.26857	0.152381	2.25428	8.46033	2.72193	5.2	0.52	0.24	2	8.04	29.2	2.2	83.2
88.nii.gz	-43.4681	5.30115	1.78739e+06	3.51603	22.7816	4.76288	11.9887	-15.9435	17.5385	-8.94932	-86.7583	98.747	9.61954	285.035	-1.4338	7.14958e+06	0.0991736	557.078	265.503	14770.6	-599.481	57.7829	16.6312	0.55869	3.22344	2.77546	5.83295	0.33783	0.243823	0.966153	0.875372	-0.622536	0.99152	0.288659	15.9735	0.0444271	4.57347	0.0674188	3.14673	18.6035	3.64125	11.9091	0.541322	0.322314	2.18182	22.3079	256.955	2.18182	644.318
89.nii.gz	-46.3063	-4.70448	1.72819e+06	2.42334	11.419	2.98738	-3.19194	-20.0473	10.2635	-16.1244	-48.254	45.062	4.81588	280.275	-0.998277	1.38255e+07	0.235537	180.621	50.9731	815.68	-53.9908	15.9705	8.4613	0.329501	2.22517	2.11146	3.03245	0.449853	0.373519	0.930975	0.835988	-0.414527	0.925484	0.322724	7.00656	0.0803109	3.84014	0.151112	2.83757	6.10795	3.42512	6.45455	0.293388	0.900826	5.18182	7.24793	48.9091	5.27273	304.909
9.nii.gz	-4.18231	45.9824	1.06287e+07	3.74629	29.0104	2.33789	56.7873	25.4633	15.766	30.9029	-16.5416	73.3289	11.6331	326.016	-0.582053	8.50292e+07	0.085	360.135	109.125	2859.98	-101.509	32.5446	12.1836	0.419154	2.64064	2.65398	4.51731	0.40062	0.319422	0.959135	0.869817	-0.382923	0.963069	0.336864	10.1952	0.0229557	5.68834	0.0530726	3.99256	11.1821	5.22272	21.86	0.2186	2.8044	8.5	14.9756	107.52	9.88	1344.98
90.nii.gz	-55.2171	-29.5212	336565	1.92193	22.59	1.2303	-28.228	-40.8199	11.3623	-34.3651	-55.9945	27.7664	9.39467	259.447	-0.333936	1.34626e+06	0.28	138.628	13.1667	153.617	-15.4815	5.36806	20.5417	-0.490703	4.04167	0.479574	0.118056	0.289881	0.195199	0.733326	0.662078	-0.852629	0.953795	0.196424	4.10417	0.305556	1.81291	0.333333	0.896241	6.47743	1.92193	2.6	0.52	0.24	1.4	5.84	25.2	2.2	68.4
91.nii.gz	4.56717	42.2394	3.90912e+06	3.40753	22.3898	2.82373	52.1413	24.6674	12.5072	28.7881	-13.0052	65.1465	8.40401	325.042	-0.620037	1.56365e+07	0.110299	243.066	80.0281	781.059	-41.7469	16.521	13.8633	0.0862913	2.91821	2.74399	4.7939	0.372359	0.285042	0.940995	0.841702	-0.427185	0.968213	0.303996	8.90687	0.0328253	5.11597	0.0734243	3.43004	7.59609	4.29053	15.2703	0.41271	0.660336	4.08108	9.86267	80.5135	3.37838	304.73
92.nii.gz	-44.0873	-6.47227	3.77033e+06	2.85394	14.8849	2.87811	4.29022	-20.0572	10.6619	-16.4808	-49.912	54.2023	6.9173	280.265	-0.691873	1.50813e+07	0.163194	180.533	48.7974	1167.07	-63.7745	19.7726	3.56761	0.681216	1.41072	2.09117	1.45136	0.546872	0.492311	0.972933	0.894882	-0.311712	0.900856	0.410552	6.68824	0.0497192	4.67182	0.103714	3.60474	5.83505	4.32393	10.8333	0.225694	1.78993	7.83333	6.7079	48.6875	9.125	496.396
93.nii.gz	-41.3586	8.3352	2.11033e+06	3.53257	29.9452	1.92434	21.0414	-15.7311	16.3062	-12.7988	-46.2908	67.3321	12.4008	284.897	0.0536678	8.44131e+06	0.0976331	357.654	71.3619	2902.21	-41.557	37.843	19.3996	0.332671	3.78249	2.65503	4.4755	0.285895	0.180338	0.92609	0.810049	-0.566086	0.989422	0.206473	8.16952	0.0335748	4.95313	0.0553075	3.59208	14.3106	3.82525	15.3077	0.588757	0.289941	2.53846	14.3905	68.9231	2	144.154
94.nii.gz	-51.5376	-29.0012	1.28972e+06	2.58426	16.5352	3.45279	-25.414	-39.7228	9.79499	-35.0727	-70.6075	45.1935	6.91213	260.538	-1.02612	5.15889e+06	0.185596	135.876	64.1432	411.953	-35.8303	11.3313	5.03996	0.405432	1.57193	2.11191	2.49814	0.554416	0.495553	0.957585	0.878939	-0.380249	0.914404	0.331204	7.90959	0.0746118	3.88371	0.132617	3.01933	4.09282	3.51109	5.21053	0.274238	1.05817	3.52632	5.72299	62.3684	8.26316	629.105
95.nii.gz	0.304941	36.6246	4.12754e+06	3.26596	23.8581	2.2639	43.2298	20.8832	12.9146	25.8807	-14.5844	57.8142	10.0314	321.23	-0.519044	1.65102e+07	0.12	222.493	69.4441	1241.22	-60.468	22.1058	9.0049	0.407489	2.35821	2.57361	3.11272	0.429664	0.351598	0.945629	0.849254	-0.361541	0.943248	0.327504	8.13254	0.0350256	5.10696	0.0835172	3.639	7.77767	4.01531	12.65	0.31625	0.7975	4.8	8.81	68.1	5	452.35
96.nii.gz	-21.8534	19.4955	1.06941e+07	3.51602	17.4689	3.32237	34.8317	0.642985	11.8959	2.00298	-43.1484	77.9801	7.62317	301.045	-0.582405	8.55531e+07	0.106291	242.03	104.161	2593.42	-73.715	27.6412	6.64362	0.609391	1.95017	2.45312	2.73432	0.456929	0.387245	0.97639	0.898439	-0.269121	0.917456	0.412624	9.94517	0.0207361	5.97185	0.0490435	4.18199	8.57121	4.88499	35.4915	0.300776	0.861821	12.5424	9.51975	102.364	5.0678	536.975
97.nii.gz	-20.6921	18.8533	4.27464e+06	3.17343	19.3545	2.70148	24.741	-5.03413	12.3505	-9.6655	-42.4004	67.1414	8.70734	295.36	0.278491	3.41971e+07	0.15202	232.632	79.7187	2171.06	71.2975	29.3718	3.8936	0.760689	1.35936	2.10685	1.94234	0.58034	0.532511	0.98171	0.918648	-0.477152	0.970588	0.389984	8.56426	0.0665552	4.68988	0.203457	3.77299	8.31635	4.60431	9.28571	0.189504	3.79425	7.44898	9.31029	81.0408	13.0408	857.49
98.nii.gz	-20.4021	55.1039	1.20639e+06	3.25163	45.4602	1.77856	58.0131	15.766	24.6497	16.7488	-30.1799	88.1931	16.3431	317.068	-0.0256707	9.6511e+06	0.111111	824.116	138.305	15711.9	-241.969	84.4269	37.8452	0.399437	5.10714	2.2977	8.39865	0.258203	0.15874	0.914373	0.803668	-0.786389	0.996243	0.143228	11.2411	0.0738467	3.78558	0.0855655	2.56832	30.568	3.25163	6.66667	0.555556	0.222222	1.33333	33.6875	149.25	2	379.75
99.nii.gz	-4.95832	41.003	1.6725e+06	3.07782	51.4755	3.72919	46.0328	22.6344	20.9534	28.7433	-32.9108	80.376	14.7596	323.313	-0.215514	8.69152e+06	0.159763	636.276	166.517	7415.75	-229.705	59.3122	39.2375	0.373115	5.2875	2.49505	8.98188	0.386855	0.304916	0.94948	0.859989	-0.622208	0.988408	0.291735	12.6886	0.0922656	4.20376	0.141667	3.15982	24.6374	3.625	8.07692	0.621302	0.8125	2.25	26.9231	161	3.875	766.625
[truncated: 5,000 more columns]

## Sheet: LLLN_features
ID	log_sigma_2_0_mm_3D_firstorder_10Percentile	log_sigma_2_0_mm_3D_firstorder_90Percentile	log_sigma_2_0_mm_3D_firstorder_Energy	log_sigma_2_0_mm_3D_firstorder_Entropy	log_sigma_2_0_mm_3D_firstorder_InterquartileRange	log_sigma_2_0_mm_3D_firstorder_Kurtosis	log_sigma_2_0_mm_3D_firstorder_Maximum	log_sigma_2_0_mm_3D_firstorder_Mean	log_sigma_2_0_mm_3D_firstorder_MeanAbsoluteDeviation	log_sigma_2_0_mm_3D_firstorder_Median	log_sigma_2_0_mm_3D_firstorder_Minimum	log_sigma_2_0_mm_3D_firstorder_Range	log_sigma_2_0_mm_3D_firstorder_RobustMeanAbsoluteDeviation	log_sigma_2_0_mm_3D_firstorder_RootMeanSquared	log_sigma_2_0_mm_3D_firstorder_Skewness	log_sigma_2_0_mm_3D_firstorder_TotalEnergy	log_sigma_2_0_mm_3D_firstorder_Uniformity	log_sigma_2_0_mm_3D_firstorder_Variance	log_sigma_2_0_mm_3D_glcm_Autocorrelation	log_sigma_2_0_mm_3D_glcm_ClusterProminence	log_sigma_2_0_mm_3D_glcm_ClusterShade	log_sigma_2_0_mm_3D_glcm_ClusterTendency	log_sigma_2_0_mm_3D_glcm_Contrast	log_sigma_2_0_mm_3D_glcm_Correlation	log_sigma_2_0_mm_3D_glcm_DifferenceAverage	log_sigma_2_0_mm_3D_glcm_DifferenceEntropy	log_sigma_2_0_mm_3D_glcm_DifferenceVariance	log_sigma_2_0_mm_3D_glcm_Id	log_sigma_2_0_mm_3D_glcm_Idm	log_sigma_2_0_mm_3D_glcm_Idmn	log_sigma_2_0_mm_3D_glcm_Idn	log_sigma_2_0_mm_3D_glcm_Imc1	log_sigma_2_0_mm_3D_glcm_Imc2	log_sigma_2_0_mm_3D_glcm_InverseVariance	log_sigma_2_0_mm_3D_glcm_JointAverage	log_sigma_2_0_mm_3D_glcm_JointEnergy	log_sigma_2_0_mm_3D_glcm_JointEntropy	log_sigma_2_0_mm_3D_glcm_MaximumProbability	log_sigma_2_0_mm_3D_glcm_SumEntropy	log_sigma_2_0_mm_3D_glcm_SumSquares	log_sigma_2_0_mm_3D_gldm_DependenceEntropy	log_sigma_2_0_mm_3D_gldm_DependenceNonUniformity	log_sigma_2_0_mm_3D_gldm_DependenceNonUniformityNormalized	log_sigma_2_0_mm_3D_gldm_DependenceVariance	log_sigma_2_0_mm_3D_gldm_GrayLevelNonUniformity	log_sigma_2_0_mm_3D_gldm_GrayLevelVariance	log_sigma_2_0_mm_3D_gldm_HighGrayLevelEmphasis	log_sigma_2_0_mm_3D_gldm_LargeDependenceEmphasis	log_sigma_2_0_mm_3D_gldm_LargeDependenceHighGrayLevelEmphasis
1.nii.gz	-17.053	40.7416	1.73588e+07	4.08273	30.5869	3.00093	57.0029	13.2125	18.5816	14.0313	-54.5887	111.592	13.1072	314.054	-0.510883	1.38871e+08	0.0690857	527.565	215.799	7627.02	-146.683	48.9208	27.0541	0.293719	4.07745	3.26812	8.88709	0.312093	0.217663	0.955731	0.86042	-0.30553	0.953107	0.215793	14.4997	0.0111724	6.75	0.0347081	4.55626	18.9937	5.73395	44.2614	0.251485	1.80217	12.1591	21.0878	221.085	7.71591	1952.57
10.nii.gz	-28.0394	51.8466	4.85673e+06	4.05225	43.7575	2.22391	64.671	7.29066	23.7094	0.691825	-44.1188	108.79	17.7319	308.594	0.388288	3.88538e+07	0.0672818	802.443	149.001	25109.8	468.938	106.165	15.5863	0.744829	2.82588	2.74967	7.25305	0.400868	0.322078	0.972236	0.895465	-0.547986	0.993584	0.334334	11.2405	0.0200059	5.80463	0.048493	4.46083	30.4377	4.55958	19.8627	0.389466	0.471357	3.43137	32.3329	152.902	3.94118	717.725
100.nii.gz	-15.6875	42.7385	5.91359e+06	3.76395	25.729	4.83931	105.083	21.2523	16.9601	21.0579	-29.1375	134.22	10.4389	322.098	0.386761	2.36544e+07	0.0889504	544.207	131.424	12514.4	71.8881	51.5328	22.6177	0.385087	3.48646	3.11362	10.1679	0.359523	0.276336	0.974285	0.897557	-0.4101	0.972722	0.29425	11.1422	0.0215538	5.77993	0.05625	4.09453	18.5376	4.57369	21.5965	0.378886	0.665436	5.07018	22.3416	138.754	3.5614	554.123
101.nii.gz	-2.22689	41.1911	1.4014e+07	3.75283	22.1662	2.86928	58.6405	19.372	13.6695	17.8231	-28.6284	87.2689	9.48932	319.831	-0.11611	112111701	0.0873248	293.23	115.479	1520.46	9.1711	22.2231	20.7841	0.0276012	3.76321	2.81299	4.59219	0.317509	0.222652	0.943624	0.838453	-0.363532	0.9615	0.221108	10.728	0.018722	5.99287	0.0452017	3.91318	10.7518	5.43898	34.1095	0.248974	1.80979	11.9635	11.598	119.788	8.29927	935.818
102.nii.gz	3.18976	53.0769	1.63202e+07	3.80961	30.0219	2.23596	64.1677	29.3322	15.3192	30.7753	-15.1206	79.2883	11.451	329.85	-0.191376	130561250	0.0797333	341.351	125.448	4088.02	-45.4241	42.1644	6.57443	0.728297	1.91225	2.50537	2.78286	0.476883	0.408141	0.979011	0.9056	-0.284784	0.932595	0.378308	10.7946	0.0153967	6.3995	0.0544804	4.55506	12.1847	5.41331	38.4933	0.256622	1.75396	11.96	13.5844	120.5	7.38667	1037.66
103.nii.gz	-12.2018	27.7835	4.76227e+06	3.23794	18.6618	3.00023	32.465	11.4284	11.4569	14.2888	-25.5588	58.0238	8.00546	311.752	-0.786761	3.80981e+07	0.1212	201.502	90.1432	1534.3	-92.7951	21.2553	6.6314	0.520916	2.02744	2.36212	2.14003	0.448367	0.374985	0.96441	0.874283	-0.365878	0.944494	0.384868	9.29958	0.0337506	5.09133	0.0580801	3.59834	6.97168	4.20075	20.6735	0.421908	0.632237	5.93878	8.12162	85.4898	4.71429	448.551
104.nii.gz	-21.035	24.8501	4.70339e+06	3.47562	18.3331	3.62501	38.0636	0.234539	13.4288	1.84599	-51.8889	89.9525	8.3061	300.749	-0.338353	3.76271e+07	0.113905	308.952	151.904	4661	-88.3596	34.6099	12.0794	0.48501	2.63466	2.83305	4.87505	0.428675	0.350738	0.969479	0.887322	-0.399644	0.965466	0.286731	12.0942	0.0331648	5.39487	0.108047	3.97083	11.6723	4.61843	14.8462	0.285503	2.03994	5.92308	12.865	144.673	6.84615	1087.44
105.nii.gz	26.5038	54.3583	463436	2	19.6197	1.44809	57.5487	40.134	12.0973	39.3915	24.2043	33.3444	7.5224	340.381	0.113404	3.70749e+06	0.25	167.826	13.25	1.26562	0	0.5625	23.125	-0.932836	4.375	0.25	0.5625	0.21875	0.0944231	0.764197	0.664103	-0.916667	0.929873	0.113852	4.0625	0.4375	1.25	0.4375	0.25	5.92188	2	4	1	0	1	7.25	27.5	1	27.5
106.nii.gz	-65.2322	-3.20797	1.03897e+06	3.18201	45.7225	1.70664	-2.08184	-28.7215	22.3353	-18.0589	-71.3809	69.2991	17.4141	272.419	-0.540527	4.15588e+06	0.122449	620.182	119.131	6354.32	-229.301	52.0994	38.0625	0.108207	4.6875	2.58596	12.9269	0.328678	0.253868	0.880515	0.791909	-0.645532	0.988059	0.264717	10.7438	0.0669531	3.95471	0.096875	3.06096	22.5405	3.18201	6.71429	0.479592	0.673469	1.71429	25.5969	121.357	3.14286	591.071
107.nii.gz	-8.17723	29.1244	967100	2.64644	22.9547	2.30888	40.6653	10.5366	13.1549	9.48515	-18.2065	58.8717	9.04131	310.982	0.0944204	3.8684e+06	0.18	277.045	55.2917	811.74	-12.6343	21.6303	24.8917	-0.0793785	4.375	2.11479	5.6625	0.25003	0.137832	0.883168	0.762522	-0.629961	0.973405	0.143825	7.4625	0.0979167	3.3942	0.129167	2.35254	11.6305	2.64644	6.8	0.68	0.16	1.8	11.64	55.2	1.6	115.2
108.nii.gz	-62.652	23.2067	3.35756e+06	3.67845	53.2175	2.24148	29.8573	-8.29153	26.3431	1.82848	-73.2479	103.105	20.3594	293.413	-0.749123	2.68605e+07	0.095332	997.409	236.828	38541.4	-1159.49	127.64	14.4184	0.792086	2.96626	2.681	4.68951	0.388059	0.301234	0.969953	0.884396	-0.560387	0.991081	0.257925	14.4396	0.0321498	5.22397	0.0901207	4.08709	35.5147	4.20169	14.0769	0.360947	1.66075	3.71795	39.4635	231.179	5.35897	1737.85
109.nii.gz	-21.711	9.73097	3.01236e+06	3.16633	21.9547	1.91524	17.1676	-6.86678	10.0608	-7.07254	-25.26	42.4276	7.66765	293.372	0.254663	2.40989e+07	0.118367	140.341	31.3172	328.773	-1.20038	11.9436	12.5032	-0.0244469	2.86053	2.45377	3.93678	0.365576	0.275259	0.902863	0.796962	-0.513591	0.977874	0.300288	5.59922	0.0421217	4.65793	0.0655678	3.03228	6.11171	4.11472	9.4	0.268571	1.18857	4.14286	5.98694	32.1429	6.02857	203.8
11.nii.gz	-25.1111	30.9769	1.8628e+07	4.14625	28.4293	3.99028	61.5811	3.53986	18.0363	5.62622	-90.8969	152.478	12.1976	304.428	-0.379602	1.49024e+08	0.0684884	540.04	446.58	10621.4	-166.654	52.6627	21.5263	0.409921	3.7269	3.15538	6.77713	0.322459	0.227808	0.980086	0.90081	-0.337915	0.963837	0.230737	20.9447	0.011778	6.65237	0.0304539	4.54297	18.5473	5.84081	48.3234	0.240415	1.80075	13.7662	21.9206	429.92	7.52736	3358.44
110.nii.gz	-12.4517	46.2995	1.95267e+07	4.08364	28.0253	4.67059	75.0183	19.6734	18.024	20.9391	-71.6855	146.704	11.7193	320.581	-0.96473	1.56214e+08	0.0710803	581.103	402.929	14709.1	-370.253	56.0392	21.5684	0.44582	3.48301	3.1842	8.8244	0.352413	0.262786	0.979398	0.905416	-0.28797	0.945438	0.258101	19.8561	0.0112266	6.75725	0.0292027	4.57882	19.4019	5.8085	36.5579	0.19241	2.63091	13.5053	23.464	400.437	10.7684	4699.62
111.nii.gz	5.67947	52.0603	428014	2	32.6683	1.66307	60.4215	26.3431	20.1432	20.0259	4.89889	55.5226	12.5251	327.114	0.514518	7.53304e+06	0.25	503.69	23.25	1314.78	0	19.625	65	-0.567493	7.25	0.5	4.625	0.167353	0.0803541	0.755484	0.663345	-1	0.960337	0.143351	5.75	0.375	1.5	0.375	0.5	21.1562	2	4	1	0	1	22.6875	55.75	1	55.75
112.nii.gz	-10.4506	68.9382	4.5882e+06	3.90983	48.5892	2.01174	81.1188	29.2707	23.7475	28.792	-23.0622	104.181	17.0332	330.519	0.00484084	3.67056e+07	0.0770975	823.731	171.319	13455.1	-177.713	74.8441	52.7871	0.204905	5.95275	3.15039	13.5938	0.239758	0.147769	0.912409	0.803817	-0.631768	0.995366	0.15534	12.8658	0.0303091	5.11874	0.0513745	3.86715	31.9078	4.38602	17.0476	0.405896	0.521542	3.2381	32.9365	161.381	3.14286	620.095
113.nii.gz	4.01245	44.2056	1.17763e+06	2.91398	16.8756	2.71725	45.6775	26.8239	12.3182	30.0218	-6.46355	52.1411	9.08392	327.196	-0.793602	2.33171e+07	0.140496	243.438	72.7616	1286.25	-71.8979	19.6905	19.5312	-0.00967634	3.6003	2.03734	5.82494	0.297237	0.196185	0.899252	0.787726	-0.769344	0.991612	0.264213	8.52545	0.0988109	3.45951	0.143006	2.3613	9.80545	2.91398	7.72727	0.702479	0.14876	1.54545	10.876	72	1.54545	138
114.nii.gz	0.310957	56.8388	538862	1.92193	24.9056	1.98396	65.2974	27.2444	21.9838	19.8405	-12.3119	77.6093	10.9369	328.287	-0.0322042	1.1855e+07	0.28	683.473	68.125	3437.37	-97.9815	36.1181	65.5417	0.0428974	6.375	0.896241	9.72917	0.340776	0.266193	0.848064	0.760537	-0.579784	0.719723	0.016692	8.60417	0.416667	1.64624	0.416667	0.896241	25.4149	1.92193	2.6	0.52	0.24	1.4	28.96	106.4	2.2	165.2
115.nii.gz	-49.1134	43.941	828721	3.16993	55.5871	2.04417	62.7285	0.882373	32.8935	-0.262093	-67.2679	129.996	23.8494	303.447	-0.162048	1.90606e+07	0.111111	1549.9	222.425	40585.2	-83.4109	141.583	94.2042	0.176824	8.0375	2.04339	29.2485	0.160671	0.0630466	0.901422	0.78738	-0.904146	0.997096	0.0926816	14.4604	0.108333	3.22672	0.108333	2.22672	58.9469	3.16993	9	1	0	1	60.9136	272.778	1	272.778
116.nii.gz	-7.69488	28.1848	4.764e+06	3.43263	21.9478	6.42203	41.8862	8.12602	13.2874	8.75231	-64.2541	106.14	8.65035	308.675	-1.38655	3.8112e+07	0.1088	338.399	256.849	3424.88	-127.454	26.0116	14.6127	0.282046	2.9469	2.66914	5.39946	0.373154	0.28786	0.97258	0.889556	-0.479552	0.973843	0.315042	15.932	0.0351499	4.96313	0.0653523	3.49726	10.1561	4.52108	13.84	0.2768	1.0624	5.44	13.4164	240.22	6.08	1533.1
117.nii.gz	-0.719202	66.1142	993467	2.72548	59.227	1.35199	73.4893	30.7151	30.256	19.4589	-15.8424	89.3317	26.2161	332.243	0.05441	2.18563e+07	0.160494	1012.69	144.875	13364.7	-240.309	75.7622	78.55	-0.0071709	7.05	2.02011	25.0444	0.241399	0.159602	0.850008	0.760546	-0.782283	0.988705	0.180477	12.0583	0.1175	3.15345	0.1375	2.20345	38.5781	2.72548	5.88889	0.654321	0.17284	1.44444	40.4691	149.556	1.66667	342.222
118.nii.gz	-4.22757	33.0955	2.06264e+06	3.02304	27.3986	2.10969	39.9359	13.0282	12.7445	8.06824	-16.9553	56.8911	10.0047	313.402	0.163214	3.63024e+07	0.133787	234.158	65.0695	1311.81	-21.5394	25.0782	12.6779	0.324823	2.93456	2.39863	3.95361	0.357322	0.270867	0.925306	0.8181	-0.528284	0.971574	0.325969	7.87188	0.0605317	4.21013	0.101671	3.12326	9.43902	3.21351	10.5238	0.501134	0.249433	2.80952	9.60998	59.9524	2.42857	194.524
119.nii.gz	-3.91488	56.7863	1.09454e+06	3.12193	46.2828	2.29207	61.2929	29.5528	25.8008	39.6598	-30.464	91.7569	19.8977	330.838	-0.705161	2.01395e+07	0.12	848.633	202.131	9297.41	-307.149	60.2275	62.1375	-0.073536	6.625	2.06798	17.325	0.206744	0.124638	0.88015	0.770727	-0.886352	0.996801	0.224379	14.225	0.103125	3.33048	0.103125	2.08048	30.5912	3.12193	10	1	0	1.2	36.24	215.8	1	215.8
12.nii.gz	-64.2727	-11.6757	1.14068e+06	3.33718	23.9388	2.87635	8.80618	-41.8916	17.3479	-44.7909	-80.0768	88.8829	11.5341	259.034	0.563309	9.12542e+06	0.107266	478.711	82.1225	6299.76	227.889	44.4365	15.7416	0.4726	3.29215	2.32549	3.94844	0.335949	0.234273	0.960301	0.860489	-0.701883	0.993869	0.207553	8.6521	0.0582583	4.20188	0.0905692	3.08478	15.0445	3.49923	8.05882	0.474048	0.366782	1.82353	18.6436	100.706	2.52941	218
120.nii.gz	-17.4343	70.4971	1.448e+06	3.39275	54.4958	2.73235	99.9437	31.3463	30.9255	35.908	-54.1599	154.104	16.8749	333.744	-0.430374	3.47521e+07	0.100592	1594.65	402.384	38573.9	-750.1	132.97	95.6066	0.150149	8.40427	2.67091	24.1352	0.166913	0.0714733	0.9164	0.799241	-0.805606	0.996924	0.0460514	19.8093	0.0688554	3.90057	0.094246	2.87626	57.1441	3.39275	9.61538	0.739645	0.130178	1.30769	62.8994	381.385	1.46154	693.385
121.nii.gz	-20.4974	44.8158	1.24631e+07	4.29595	34.1344	4.17393	65.165	13.2669	21.6527	15.3754	-90.3845	155.55	14.6976	314.505	-0.948043	9.97048e+07	0.0588309	777.331	543.49	20294	-496.531	70.5267	32.5027	0.37084	4.34077	3.3539	12.3602	0.311012	0.221782	0.973115	0.891562	-0.401127	0.980635	0.232984	23.1043	0.0118044	6.58689	0.0278488	4.53491	25.7574	5.64274	31.2222	0.247795	1.70799	7.4127	31.4405	522.802	7.30159	4739.18
122.nii.gz	-24.7383	57.6567	3.15998e+06	3.86673	47.8353	2.89975	93.5596	11.914	30.0979	14.1401	-62.7994	156.359	18.3115	314.244	0.121235	2.52799e+07	0.0742188	1459.16	311.872	48908.3	-386.323	125.179	113.164	0.0640774	8.50716	3.15061	36.8232	0.202965	0.117176	0.913071	0.80839	-0.714453	0.996825	0.0992114	17.555	0.0419818	4.69688	0.0675214	3.46553	59.586	4.03891	13	0.40625	0.484375	2.375	59.0225	312.031	3.125	1143.03
123.nii.gz	-31.0846	33.5343	1.36472e+06	3.05656	31.838	2.53695	36.7614	0.515359	20.1138	1.38205	-56.5196	93.2811	13.1763	301.632	-0.493763	4.14876e+07	0.128889	672.087	176.08	10312.8	-183.912	70.14	31.8336	0.348627	4.53693	2.70064	10.1944	0.306509	0.217453	0.932914	0.829792	-0.600602	0.984942	0.190906	12.9007	0.0598697	4.12226	0.104482	3.07333	25.4934	3.24022	7.53333	0.502222	0.248889	1.93333	27.3067	186.067	2.6	558.067
124.nii.gz	-5.87742	41.4598	1.88761e+07	3.84358	26.4433	2.68252	58.8695	19.7796	14.7467	20.403	-31.8264	90.6959	10.5089	320.293	-0.275	1.51009e+08	0.0790406	328.675	148.79	3128.49	-79.0383	32.4216	14.9259	0.365461	3.07726	2.97075	5.24559	0.354759	0.264395	0.962821	0.869653	-0.216616	0.893523	0.292722	12.0159	0.0115971	6.6938	0.0287209	4.34022	11.8369	5.475	42.4348	0.230624	1.72637	14.5435	13.0633	144.315	8.19565	1390.38
125.nii.gz	-3.93865	44.7717	9.65486e+07	3.95033	27.0313	3.18699	82.8728	19.9091	15.3824	19.2534	-43.8718	126.745	10.9261	320.486	0.144876	7.72389e+08	0.075086	369.515	187.061	5273.44	87.5635	43.1969	13.337	0.525349	2.7272	2.97529	5.70367	0.400787	0.31861	0.98173	0.910924	-0.131149	0.785848	0.316666	13.401	0.00864456	7.28554	0.0233907	4.68307	14.1335	6.6149	136.24	0.144937	5.16351	70.5809	14.9174	196.479	19.1702	3177.5
126.nii.gz	-19.2191	65.8459	1.34548e+07	4.40511	42.1165	3.00808	86.2688	29.2321	25.0754	32.783	-62.3946	148.663	16.8151	330.739	-0.703985	1.07638e+08	0.0553242	994.544	441.802	29590.5	-685.703	96.1121	48.975	0.326034	5.39531	3.6433	17.9536	0.274857	0.18237	0.955986	0.863359	-0.420224	0.985374	0.170365	20.7291	0.0103247	6.76068	0.0244068	4.76728	36.2718	5.45227	31.5366	0.256395	1.43208	6.80488	40.0184	414.74	6.57724	3575.1
127.nii.gz	26.6684	52.8782	465027	1.5	10.6926	2.04847	56.6446	40.7106	10.3103	43.0539	20.0901	36.5545	1.03597	340.965	-0.514116	7.16142e+06	0.375	173.057	19.5	75.0312	0	6.125	18.5	-0.00505051	3.5	0.5	0.125	0.39375	0.294706	0.810771	0.731818	-0.583333	0.697405	0.0485048	4.75	0.5	1.25	0.5	0.5	6.15625	1.5	2	0.5	0.25	1.5	6.1875	28.75	2.5	66.25
128.nii.gz	-28.3266	41.188	2.28933e+07	4.3197	35.0188	2.41977	65.1648	5.89982	20.4852	6.6185	-53.4484	118.613	14.6206	306.938	0.0174254	183146613	0.0558011	636.521	179.546	14484.7	102.811	77.8547	20.0871	0.58888	3.62018	3.18371	6.56156	0.320805	0.225638	0.970323	0.880589	-0.273883	0.950171	0.246315	12.8483	0.00695725	7.3888	0.0188354	4.96917	24.4855	6.06808	61.2387	0.252011	1.71309	13.5597	25.3026	187.21	7.46914	1400.55
129.nii.gz	22.6368	54.3672	688538	2.25163	24.9724	1.33494	55.2093	38.4848	12.8105	38.4506	20.5776	34.6318	10.5578	338.757	-0.0195044	9.63954e+06	0.222222	184.422	21.5833	285.03	-13.6878	11.5816	16.1042	-0.224988	3.4375	1.39624	3.27604	0.324008	0.231661	0.821631	0.724904	-0.916667	0.987709	0.257795	4.73958	0.211806	2.31291	0.239583	1.39624	6.92144	2.25163	3.33333	0.555556	0.222222	1.33333	7.88889	26.6667	2	27.6667
13.nii.gz	-43.9432	14.1463	3.54425e+06	3.80555	23.7151	3.09168	33.1283	-17.1298	17.917	-19.0078	-75.732	108.86	11.3349	283.815	0.17899	2.8354e+07	0.0836777	535.643	210.659	5736.32	-17.5282	41.2651	34.0593	0.0990862	4.74344	2.85604	9.4385	0.282962	0.190354	0.943974	0.841028	-0.646881	0.99336	0.19178	14.4294	0.038456	4.84905	0.0667467	3.45505	18.8311	4.39682	13.8636	0.315083	0.907025	3.68182	21.3161	191.5	4.72727	912.091
130.nii.gz	-23.0865	42.3267	3.23275e+07	4.31466	30.1981	3.21894	74.6421	11.0027	19.9668	13.5541	-68.5206	143.163	13.434	312.045	-0.49155	2.5862e+08	0.0600958	649.388	315.361	12939.5	-277.632	59.6709	29.3327	0.338771	4.21077	3.45332	11.1099	0.305035	0.211097	0.968705	0.881571	-0.219001	0.914769	0.22264	17.5424	0.00703376	7.46471	0.0195345	4.78135	22.2509	6.03812	83.6386	0.251923	2.03077	19.9518	25.8743	304.623	7.49398	2437.8
131.nii.gz	-15.3883	65.8686	1.06379e+07	4.39464	49.3707	2.63014	82.2006	24.5951	26.2688	22.5843	-62.5225	144.723	19.4704	326.158	-0.271745	8.51031e+07	0.0556	1016.91	408.679	25782.8	-347.632	98.321	58.4218	0.272584	5.97408	3.68238	20.781	0.254882	0.165319	0.945458	0.847266	-0.486347	0.991498	0.166263	19.9636	0.0123431	6.49014	0.0291343	4.66163	39.1857	5.52347	31.34	0.3134	1.1796	5.56	41.0664	381.1	5.1	1989.34
132.nii.gz	-0.899838	62.3668	1.94079e+07	4.18697	34.5941	3.18473	88.083	33.0267	20.2071	34.4766	-57.1012	145.184	14.4462	333.976	-0.395689	1.55263e+08	0.061633	632.902	412.5	11397.2	-222.216	58.6586	35.9722	0.241618	4.75609	3.53756	12.7983	0.278929	0.182043	0.964205	0.871972	-0.300352	0.956054	0.183849	20.1685	0.00875464	7.05291	0.0232695	4.66077	23.6577	5.56929	49.6897	0.285573	1.41459	10.7241	25.0844	391.345	5.83908	2736.68
133.nii.gz	-26.2432	41.2679	2.4082e+07	4.20308	34.8203	2.34976	59.4482	7.5827	19.5928	7.11243	-47.7363	107.185	14.0525	308.522	0.038234	1.92656e+08	0.059601	578.466	153.189	13394.6	-22.2884	74.6225	21.1327	0.557699	3.59178	3.22635	7.73298	0.332495	0.238071	0.961546	0.869506	-0.257144	0.939828	0.241249	11.8235	0.00728615	7.34066	0.0200698	4.94508	23.9388	6.06593	57.9407	0.229015	1.95535	15.0791	23.1936	167.383	9.1581	1263.3
134.nii.gz	15.0279	54.5612	448521	2	31.509	1.23127	57.9126	34.3435	17.9835	33.2158	13.0298	44.8829	13.5255	334.858	0.0848147	6.90722e+06	0.25	344.55	20.75	37.5156	0	3.0625	35.875	-0.888128	5.125	0.25	3.0625	0.242659	0.162127	0.77304	0.692368	-0.916667	0.929873	0.293644	4.9375	0.4375	1.25	0.4375	0.25	9.73438	2	4	1	0	1	14.6875	42.25	1	42.25
135.nii.gz	-24.5758	29.5602	3.29015e+06	3.6416	28.4414	3.12004	40.538	1.4706	17.8928	5.67071	-58.1199	98.6578	11.7244	302.313	-0.58589	2.63212e+07	0.0925926	508.454	181.025	4697.92	-102.565	37.696	29.4548	0.170493	4.30648	2.77398	9.03114	0.304769	0.204337	0.943216	0.842999	-0.608064	0.990433	0.158035	13.3546	0.0420846	4.68202	0.0738587	3.3552	16.7877	4.21813	13.3889	0.371914	1.44136	3.33333	20.25	184.944	5.66667	1161.11
136.nii.gz	-15.4343	32.8697	1.1008e+08	3.93973	25.5286	2.89778	67.4068	7.889	14.8694	7.40198	-51.4264	118.833	10.3836	308.452	0.0690086	8.80642e+08	0.0756218	347.237	170.674	4670.79	41.5421	40.7087	12.0343	0.541343	2.6477	2.92251	4.84622	0.402519	0.319761	0.98194	0.909742	-0.116161	0.751917	0.316968	12.7865	0.00852366	7.33646	0.023292	4.67641	13.1857	6.69522	168.573	0.145698	5.21159	87.4944	13.973	184.73	20.1979	3302.25
137.nii.gz	-11.0874	38.8152	7.12933e+07	4.01433	26.6324	3.36695	70.8676	14.8929	16.0186	16.9961	-55.248	126.116	10.9978	315.55	-0.502197	5.70347e+08	0.0730275	414.168	246.435	7885.96	-172.855	47.8236	15.4718	0.510938	3.06905	3.07607	5.82708	0.365172	0.276103	0.980123	0.903539	-0.132129	0.798757	0.283502	15.4384	0.00754428	7.43602	0.0180258	4.74135	15.8238	6.38329	134.246	0.187494	2.80044	52.2877	16.5363	255.619	12.905	3419.59
138.nii.gz	-31.2742	51.1563	2.05803e+07	4.54537	41.3707	2.84535	87.1868	14.5104	25.0738	16.791	-76.9308	164.118	17.3637	316.077	-0.408855	1.64642e+08	0.049015	987.591	423.882	25233.2	-300.201	89.5372	40.101	0.372968	4.93617	3.63246	15.1712	0.281129	0.18672	0.968761	0.881526	-0.33886	0.974036	0.183901	20.2844	0.00724212	7.31511	0.0180674	4.96387	32.4095	6.02352	59.7282	0.289943	1.44952	10.0971	39.6801	416.718	6.34951	2979.09
139.nii.gz	-18.1453	3.99077	345580	1.5	17.0749	1.3993	4.44946	-6.25836	9.94334	-4.21107	-21.0608	25.5102	7.13157	293.93	-0.293798	4.56166e+06	0.375	110.967	13.875	64.25	0	4.25	13.25	-0.527778	3.25	0.5	0.5	0.322917	0.201923	0.758811	0.673295	-0.916667	0.941102	0.0879167	4	0.40625	1.375	0.4375	0.5	4.375	1.5	2	0.5	0.25	1.5	4.5	20.5	2.5	74.5
14.nii.gz	-30.0218	38.0771	4.05851e+06	3.74095	28.8712	3.34534	52.0876	13.416	22.1601	24.1588	-61.667	113.755	15.2916	314.624	-1.07189	3.24681e+07	0.092207	758.592	300.203	18762	-670.25	69.3456	24.2528	0.483468	3.62329	3.09333	10.5078	0.350823	0.26362	0.96372	0.879964	-0.445986	0.979057	0.269516	16.9975	0.0248838	5.55643	0.0715774	4.09266	23.3996	4.18989	19.7805	0.482451	1.15883	3.78049	30.401	292.683	3.82927	1449.12
140.nii.gz	-9.63691	59.5754	7.69095e+06	4.30357	41.6113	2.65758	79.6959	25.5682	23.2161	25.5044	-45.802	125.498	16.3479	326.831	-0.379224	6.15276e+07	0.058642	824.058	298.618	15813.6	-286.746	75.8672	47.0028	0.241946	5.4734	3.48573	15.8713	0.261782	0.169796	0.941128	0.839373	-0.549327	0.99454	0.172997	17.0684	0.0164207	6.05071	0.0380118	4.36801	30.7175	5.2218	24.9444	0.346451	0.999228	4.22222	32.31	277.319	4.88889	1491.71
141.nii.gz	-59.7163	29.2246	2.56763e+07	4.68221	43.4868	2.57522	58.3804	-10.7495	26.4282	-7.55437	-97.6289	156.009	18.48	291.102	-0.315252	2.0541e+08	0.0448213	1074.34	316.701	41635.8	-335.511	130.572	48.6301	0.457546	5.05994	3.70408	21.9813	0.295261	0.205704	0.960452	0.87582	-0.329922	0.976697	0.210823	17.2085	0.00519727	7.85286	0.0149318	5.28999	44.8005	6.34672	72.8218	0.240336	2.28298	13.5809	43.6759	380.756	8.55776	3549.03
142.nii.gz	-13.7161	100.017	5.55767e+06	4.38162	60.4845	2.36606	138.896	44.6777	37.197	43.9441	-39.5286	178.424	26.3992	347.59	-0.0183251	4.44614e+07	0.0538752	2016.15	411.613	113128	-1139.74	219.733	107.588	0.346531	8.5582	3.52737	30.3506	0.182553	0.0958067	0.930356	0.821208	-0.75871	0.999234	0.097659	19.5705	0.0250443	5.39264	0.0408021	4.17444	81.8302	4.75161	22.913	0.49811	0.289225	2.47826	80.1078	382.565	2.34783	796.87
143.nii.gz	4.07397	50.6017	1.73803e+07	3.75001	22.2561	4.28736	61.3097	29.0882	13.9192	30.9875	-43.4313	104.741	9.28748	329.586	-0.9178	1.39043e+08	0.0880469	328.033	232.814	5983.15	-204.989	39.5754	23.6802	0.254914	3.68822	3.27758	9.77432	0.345204	0.255675	0.957853	0.8682	-0.256212	0.926174	0.243876	15.127	0.0119224	6.67251	0.0309192	4.37295	15.8139	5.48423	37.175	0.232344	1.64984	14.0875	13.3194	248.175	9.9875	2635.81
144.nii.gz	-12.26	66.9589	1.25063e+07	4.46812	47.5956	2.26068	91.9035	25.481	25.6111	25.4076	-41.459	133.363	19.011	326.943	0.00739158	1.00051e+08	0.0522317	953.838	260.846	23080.8	-119.888	100.061	50.9865	0.329686	5.75517	3.65746	16.3715	0.240074	0.14427	0.944611	0.841502	-0.448671	0.989918	0.15696	15.7633	0.0093758	6.85725	0.0214364	4.83891	37.7618	5.52153	42.094	0.359778	0.792899	6.11111	38.5033	250.368	3.92308	1013.19
145.nii.gz	-45.7684	33.1199	6.5851e+06	4.25608	54.6086	1.71791	52.1719	-5.15505	26.1182	-0.0312324	-52.0945	104.266	21.2813	296.313	-0.0255268	5.26808e+07	0.0588444	867.797	116.523	19227.7	42.3727	104.478	30.0928	0.555466	4.28709	3.20591	10.0616	0.313607	0.221059	0.946936	0.85007	-0.572538	0.995526	0.200884	9.88844	0.0180131	5.93915	0.0422132	4.42762	33.6426	5.01522	20.3867	0.271822	1.30916	4.41333	35.5822	145.133	7.13333	800.387
146.nii.gz	-19.5808	33.6417	1.73238e+08	4.20694	25.6218	4.82509	93.2923	7.02829	17.2014	6.53295	-108.38	201.672	10.6425	307.93	0.114158	1385906115	0.0700623	554.793	585.264	17855.9	181.756	60.9289	16.4248	0.570674	2.95689	3.09449	7.48338	0.388361	0.305027	0.990695	0.936095	-0.134671	0.805284	0.306067	23.961	0.00808665	7.65309	0.0244357	4.89532	19.3384	6.8968	271.413	0.148556	4.94781	128.004	22.3128	593.358	18.0651	10696.1
147.nii.gz	-3.78881	41.5578	2.89224e+07	3.71785	25.7843	2.32581	61.5951	17.548	14.208	16.2072	-13.7183	75.3133	10.5253	318.005	0.26711	2.31379e+08	0.0828158	290.612	52.6864	2849.01	51.335	35.0849	12.1743	0.48146	2.72159	2.89235	4.56482	0.388866	0.303423	0.958316	0.86534	-0.16033	0.830264	0.312685	6.8512	0.0105211	6.84118	0.0262155	4.45143	11.8148	5.77904	53.1888	0.185975	2.27913	23.6853	11.5769	60.528	12.7622	659.22
148.nii.gz	-23.01	60.5797	1.94072e+07	4.60553	42.8884	2.98121	98.8472	18.7611	25.8751	20.671	-79.1191	177.966	17.6459	320.443	-0.0317827	1.55257e+08	0.0485709	1074.75	449.049	39996.9	-32.1538	114.427	36.5662	0.512825	4.76287	3.57283	13.1808	0.285722	0.191813	0.973968	0.890042	-0.373251	0.982074	0.192104	20.7244	0.00721675	7.31091	0.0201259	5.10665	37.7482	6.00967	50.8942	0.269281	2.12855	9.17989	42.9776	453.63	7.2328	3331.28
149.nii.gz	-37.279	25.3414	530502	2.25163	49.7339	1.38548	27.156	-3.82562	24.2143	0.460817	-38.4547	65.6106	19.9189	297.35	-0.200845	8.16974e+06	0.222222	697.782	64.75	5215.46	-106.352	50.3889	61.75	-0.135703	6.58333	1.43872	14.7222	0.244634	0.16034	0.797706	0.711992	-0.832666	0.979237	0.123983	8.20833	0.201389	2.35539	0.229167	1.43872	28.0347	2.25163	3.33333	0.555556	0.222222	1.33333	28.1389	89.5	2	90.5
15.nii.gz	2.6949	53.966	1.17827e+07	3.85358	36.4779	2.55839	62.3329	28.0401	18.786	27.0183	-32.4675	94.8004	14.6886	328.783	-0.488476	9.42617e+07	0.0835788	487.914	186.373	3262.49	-120.514	26.0715	33.1077	-0.187582	4.94262	2.94326	6.06644	0.259034	0.162688	0.927996	0.813307	-0.462397	0.978094	0.158122	13.7082	0.0287644	5.46361	0.0663105	3.4988	14.7948	5.15262	29.3119	0.268917	1.83772	9.11009	19.5982	191.954	6.88991	1688.49
150.nii.gz	-0.173049	50.8373	1.59036e+07	4.09749	30.2846	4.23508	81.858	23.6049	18.6595	23.487	-61.8742	143.732	12.2014	324.533	-0.62229	1.27229e+08	0.075216	601.741	364.16	14006.5	-147.327	56.1167	18.0639	0.508296	3.21019	3.06867	7.52369	0.366283	0.278497	0.981381	0.909116	-0.322923	0.957599	0.277097	18.8314	0.0129754	6.52077	0.0322237	4.50546	18.5451	5.75682	31.1192	0.206087	2.58401	11.3576	24.3677	354.596	10.6556	3947.27
151.nii.gz	-18.0115	56.2174	2.04816e+06	3.88418	53.0365	2.2877	78.891	18.2388	29.0181	17.8392	-53.8413	132.732	22.0675	320.013	-0.194499	1.63853e+07	0.075	1132.22	266.655	17687.3	-132.706	83.369	82.0859	0.0192849	7.24588	2.33505	24.7008	0.21585	0.127465	0.911757	0.807015	-0.909205	0.998375	0.144247	16.3038	0.0903541	3.67246	0.104243	2.61817	41.3637	4.02193	14.7	0.735	0.26	1.5	44.5875	277.15	1.7	585.85
152.nii.gz	-26.8621	38.3617	4.92614e+06	4.00001	36.07	2.35768	56.347	6.71333	21.3573	9.12317	-50.6305	106.977	15.0343	307.788	-0.0361558	3.94091e+07	0.0754438	660.405	213.287	8567.4	-29.1779	60.008	32.9245	0.297361	4.67464	2.98398	9.46313	0.273193	0.173323	0.946399	0.842271	-0.583007	0.992741	0.169015	14.3545	0.0284285	5.26283	0.0477834	3.86934	23.2331	4.57997	17.1538	0.329882	0.763314	3.92308	26.9124	191.442	4.46154	1052.4
16.nii.gz	-32.4746	8.36876	3.15226e+06	3.43927	25.9308	1.92548	17.8381	-12.3956	13.265	-11.8062	-38.817	56.6551	10.2635	288.018	0.0392725	2.52181e+07	0.0983379	237.845	43.9793	1409.96	-9.19094	27.4452	5.77513	0.646424	1.91499	2.22316	1.97323	0.45154	0.376292	0.963775	0.871272	-0.460059	0.976421	0.388577	6.20828	0.0313598	5.13864	0.0648576	3.80697	8.30509	4.1953	19.7368	0.519391	0.313019	3.73684	9.55194	45.8684	4.10526	195.868
17.nii.gz	3.40617	21.4781	2.25837e+06	2.262	13.2082	1.66061	23.4206	13.2713	6.34962	15.475	0.972049	22.4485	4.9359	313.353	-0.3129	9.03349e+06	0.217391	51.14	12.9364	44.3899	-4.55611	4.37966	3.04101	0.168448	1.36324	1.85658	1.0709	0.531885	0.479378	0.906351	0.807713	-0.244341	0.771364	0.472011	3.54943	0.0883967	3.75345	0.147467	2.56208	1.85517	3.53422	6.82609	0.296786	0.994329	5	1.99622	12.3478	6.30435	105.043
18.nii.gz	-30.4473	36.3427	1.95755e+07	4.18451	39.1384	2.50076	49.529	6.4691	21.0981	12.6985	-61.0021	110.531	15.6923	307.518	-0.599495	1.56604e+08	0.0626152	644.272	243.374	6893.06	-218.613	42.5923	42.2286	-0.0296282	5.02836	3.42112	13.4611	0.295946	0.210316	0.934172	0.837108	-0.3674	0.972046	0.212123	15.5952	0.0127388	6.55194	0.0304349	4.19285	21.2052	5.89923	48.9034	0.236248	1.49539	12.9614	25.7395	244.551	7.58937	2200.28
19.nii.gz	9.99742	55.8182	1.0282e+07	3.68231	23.4298	3.51514	62.7928	33.8165	14.0611	37.071	-22.6362	85.429	9.01654	334.307	-0.840874	8.22562e+07	0.0926276	327.653	171.838	4111.46	-146.638	33.6213	7.60244	0.631637	2.05177	2.53721	3.28103	0.455117	0.382465	0.978683	0.904434	-0.310416	0.938777	0.377454	12.858	0.0201702	5.94688	0.0544939	4.26435	10.3059	5.08043	26.7609	0.290879	1.50473	8.52174	12.9537	163.283	6.04348	1154.48
2.nii.gz	-13.2793	50.2607	4.22275e+07	4.21774	29.2772	4.01341	78.3459	21.5324	19.0705	25.739	-72.4213	150.767	12.3602	322.504	-0.932974	3.3782e+08	0.0656895	625.416	434.117	11871.9	-369.776	52.0854	30.4655	0.251744	4.2882	3.33274	9.76183	0.306781	0.214387	0.9712	0.886316	-0.232421	0.912359	0.219329	20.7029	0.00913771	7.17509	0.0232401	4.57483	20.6377	6.113	90.3892	0.222633	1.75911	26.67	25.1443	418.18	8.29557	3828.31
20.nii.gz	-18.0545	70.7424	6.04341e+06	4.26408	40.048	2.30249	81.9782	33.0221	26.4821	41.0925	-36.6927	118.671	19.1609	334.537	-0.582024	4.83473e+07	0.0576132	1011.35	286.929	12487.9	-316.597	46.741	37.4751	-0.0791772	5.26857	2.09066	5.45986	0.223184	0.119722	0.946175	0.83464	-0.775758	0.994804	0.159356	16.7908	0.0914087	3.94959	0.0966649	2.69312	21.054	4.7961	30.1111	0.557613	0.259259	3.11111	40.7654	269.111	2.03704	637.889
21.nii.gz	5.8187	71.0387	1.04918e+07	3.77511	25.2511	3.96632	80.1052	48.3525	19.5321	55.7453	-24.5125	104.618	11.8673	349.281	-1.3244	8.39343e+07	0.0968091	648.053	260.086	32565.2	-1136.58	85.439	8.64373	0.815176	2.14492	2.63611	3.91118	0.463596	0.395239	0.983323	0.916941	-0.424134	0.976709	0.369458	15.5204	0.0251876	5.79768	0.064918	4.36965	23.5207	4.89884	24.6977	0.287182	1.0384	8.32558	25.6555	258.395	6.23256	1911.65
22.nii.gz	-35.4288	24.8024	4.59904e+06	3.87065	32.9517	2.30834	41.5196	-0.598926	19.3921	5.90163	-53.3103	94.8299	14.3743	300.295	-0.516285	1.83961e+07	0.0795848	536.158	157.099	10162.1	-307.854	63.4283	12.2163	0.676789	2.68324	2.6989	4.78571	0.386344	0.303386	0.972377	0.889497	-0.479736	0.987378	0.349425	12.0117	0.0189004	5.85083	0.0364106	4.29404	18.9111	4.584	21.0784	0.413303	0.496732	4.05882	21.1496	152.275	3.27451	531.137
23.nii.gz	-19.714	27.8466	7.4402e+06	3.70896	25.1118	2.7209	33.5282	6.36449	14.5222	10.0239	-40.0724	73.6006	10.2768	306.887	-0.630742	5.95216e+07	0.0866848	320.556	138.163	4006.16	-150.168	36.6831	7.74085	0.646193	2.12925	2.53947	3.06505	0.445939	0.37223	0.972472	0.890503	-0.359348	0.959161	0.372226	11.4409	0.0211161	5.84199	0.0490554	4.18019	11.106	4.73861	24.1646	0.30588	1.19468	6.8481	12.9893	129.848	5.55696	1015.11
24.nii.gz	-11.2263	63.2671	1.04656e+07	4.25831	39.3888	3.0713	78.3667	30.553	24.3642	37.6689	-48.3658	126.733	16.6405	331.91	-0.800666	8.37246e+07	0.0610526	898.712	334.989	18264.7	-474.165	76.7433	33.3984	0.330205	4.28168	2.91607	14.1959	0.318926	0.233118	0.958178	0.870999	-0.651207	0.994755	0.263462	17.9809	0.0340865	5.30336	0.0761238	3.92219	27.5354	5.31834	31.8	0.334737	1.77795	5.8	35.5641	311.474	5.65263	2356.19
25.nii.gz	2.10378	54.9108	1.68564e+07	3.87526	25.8766	3.50914	69.7923	32.3786	16.4599	37.1452	-41.6501	111.442	11.3601	333.013	-0.828593	1.34851e+08	0.0798996	421.896	282.769	7717.18	-247.022	48.0326	8.46708	0.69511	2.09099	2.58864	3.89921	0.457616	0.390253	0.985177	0.921955	-0.310346	0.947629	0.406565	16.5187	0.0162261	6.34227	0.0424831	4.53658	14.1249	5.2781	41.9342	0.275883	1.38296	12.1447	17.1551	271.474	6.03947	1886.63
26.nii.gz	-47.9182	10.8554	4.99259e+06	3.92983	35.8806	2.40953	19.5962	-14.8365	18.9711	-12.0334	-67.7123	87.3085	14.1905	286.087	-0.580492	1.99704e+07	0.0755173	527.577	165.784	11528.6	-400.638	65.5199	10.3507	0.724182	2.58384	2.6861	3.47318	0.382726	0.296343	0.9706	0.881629	-0.440519	0.98184	0.34118	12.3282	0.0194489	5.92027	0.0526674	4.38479	18.9676	4.62296	24.2131	0.396936	0.651975	4.60656	21.3287	154.902	3.39344	744.016
27.nii.gz	-15.5535	42.7295	1.15472e+08	4.19811	29.8547	3.01331	65.3634	14.2721	18.1508	15.7371	-59.4537	124.817	12.4895	315.101	-0.374467	9.23779e+08	0.0634252	521.391	263.634	9353.52	-183.603	53.1024	31.6893	0.268595	4.28754	3.35046	10.4577	0.321031	0.233622	0.958916	0.869892	-0.15041	0.801591	0.235934	16.0687	0.00626367	7.75084	0.0172629	4.79605	21.1979	6.41803	244.273	0.210037	2.26404	73.7635	20.9714	257.068	10.4772	3049.17
28.nii.gz	-17.6618	11.0336	1.69141e+07	3.26498	16.0252	3.5718	24.2364	-2.67377	9.6496	-2.0928	-40.6471	64.8835	6.60604	297.583	-0.561296	6.76565e+07	0.122228	152.715	86.9749	1562.11	-68.898	20.4655	2.17979	0.805971	1.1035	1.86457	0.939349	0.591783	0.552416	0.989255	0.930684	-0.298076	0.91757	0.476095	9.07756	0.031099	5.43959	0.0754347	4.03772	5.66133	5.3905	37.1571	0.19454	2.32702	23.3455	6.19884	87.0105	12.1623	1086.79
29.nii.gz	-34.7037	9.46524	6.39166e+06	3.4549	19.1718	3.70755	18.1842	-8.5678	13.1356	-5.006	-61.7589	79.9431	8.12366	291.928	-1.02095	2.55666e+07	0.115022	289.356	152.67	4498.92	-206.15	32.2988	6.15731	0.669049	1.79571	2.36419	2.80383	0.494455	0.4375	0.980353	0.911256	-0.35726	0.949979	0.444186	12.0878	0.0295685	5.47624	0.0634702	4.04961	9.61403	4.6855	21.1333	0.281778	1.35929	8.62667	11.3376	147.76	6.68	1083.09
3.nii.gz	-5.81227	72.692	4.21179e+06	4.10082	45.5481	2.05809	87.762	36.1544	24.5002	36.9744	-19.6181	107.38	18.5154	337.39	-0.219866	3.36944e+07	0.06355	832.504	187.812	14655.6	-240.75	80.8565	35.2135	0.398503	4.77572	3.14474	11.9043	0.274296	0.182895	0.938461	0.835015	-0.58893	0.995356	0.224105	13.28	0.0212383	5.6296	0.0436244	4.19114	29.0175	4.17527	22.4054	0.605551	0.3813	2.35135	33.1965	172.054	2.13514	504
30.nii.gz	-23.6838	29.6098	4.00843e+07	3.9632	26.3769	3.71048	44.9405	5.99907	16.9571	9.87319	-77.0676	122.008	11.7357	306.748	-0.908977	3.20674e+08	0.075426	459.079	340.243	5509.92	-148.406	35.878	19.0817	0.231302	3.29123	3.0924	7.09334	0.375689	0.29236	0.972235	0.89206	-0.191029	0.847502	0.273627	18.329	0.0116011	6.80013	0.0324285	4.39628	13.7399	6.25418	70.3568	0.165157	4.28028	32.1315	18.2261	331.333	15.6432	6142.72
31.nii.gz	-51.2348	-4.62014	4.6727e+06	3.52055	24.7604	2.65975	5.60109	-23.8362	14.8188	-18.6644	-70.6328	76.2339	10.6455	276.77	-0.799114	3.73816e+07	0.104542	335.266	131.723	5652.49	-271.643	44.408	4.80119	0.802926	1.67282	2.22659	1.73046	0.508579	0.442665	0.984128	0.915442	-0.418972	0.966243	0.366417	11.0368	0.0317704	5.42564	0.0849469	4.07848	12.3023	4.81804	15.0984	0.247514	2.5434	6.37705	14.0113	128.607	9	1449.03
32.nii.gz	-2.09466	58.9834	7.90403e+06	3.51006	50.1056	1.38168	64.88	28.1473	22.5957	25.2142	-11.944	76.8239	19.85	329.051	0.0241949	6.32322e+07	0.106399	593.688	74.2585	3497.87	-36.6366	31.2794	73.3963	-0.353001	7.32121	2.54415	4.42853	0.238784	0.164274	0.802562	0.714933	-0.544846	0.983846	0.130996	9.20116	0.0539105	4.69208	0.128983	3.13439	26.1689	5.0269	15.9863	0.21899	3.92456	7.76712	23.6802	105.918	11.6575	1625.1
33.nii.gz	-0.778732	53.7916	7.12982e+07	4.07467	28.3143	2.86726	84.852	26.5079	16.915	26.9299	-36.6138	121.466	11.8869	327.192	-0.134126	5.70386e+08	0.0687083	446.984	199.143	6394.15	-90.2119	45.0227	26.5119	0.267864	3.77785	3.26193	10.4491	0.347768	0.261206	0.963466	0.880025	-0.188909	0.873354	0.26065	13.9467	0.00781913	7.37958	0.0195147	4.65293	17.8837	6.39843	129.441	0.194357	2.99302	45.7598	17.8311	208.611	11.6186	2442.05
34.nii.gz	3.93402	84.3161	2.18689e+07	4.25606	47.9529	2.4689	93.8449	51.1421	26.39	60.9301	-30.0499	123.895	20.1919	352.498	-0.740235	174951157	0.0641787	954.301	388.184	30783.7	-985.429	97.7755	22.5288	0.630399	3.39152	3.14524	10.1198	0.386431	0.310087	0.970571	0.894635	-0.397775	0.975609	0.302712	19.2144	0.0168414	6.33861	0.0500771	4.62057	30.0761	5.84107	38.5795	0.219202	4.48605	11.2955	38.1441	352.199	12.5568	6305.94
35.nii.gz	8.60501	59.5939	2.84564e+07	3.89622	26.2114	4.19822	74.3216	36.7309	16.3174	40.6432	-40.159	114.481	11.1626	337.38	-1.05032	2.27651e+08	0.082272	437.889	305.595	10639.5	-359.738	52.9405	7.74152	0.742068	2.08456	2.61474	3.2972	0.453377	0.380455	0.987226	0.924327	-0.272378	0.932721	0.372323	17.1549	0.0140648	6.59324	0.0402478	4.64157	15.1705	5.51695	68.64	0.27456	1.20614	20.568	17.417	300.464	5.976	1976.38
36.nii.gz	-29.8146	30.8026	2.77443e+07	4.17207	27.5402	3.71084	53.7955	0.201737	18.0697	1.46107	-85.887	139.683	12.1708	301.111	-0.52972	2.21954e+08	0.0661925	546.538	337.126	12178.3	-233.755	55.5578	13.7025	0.607767	2.84885	2.77918	4.9016	0.371192	0.279859	0.984715	0.915103	-0.366038	0.96627	0.297708	18.06	0.0149419	6.39633	0.0350102	4.51363	17.3151	6.08845	69.0458	0.22564	2.0669	20.2549	22.1184	365.458	8.36601	3370.88
37.nii.gz	-17.2834	28.7478	2.71275e+06	3.34237	25.7259	3.18804	42.4607	10.6937	15.3403	16.1297	-40.6398	83.1005	10.6534	311.262	-0.814711	1.0851e+07	0.104592	353.499	154.338	4441.68	-191.842	36.6168	17.2755	0.353429	3.26063	2.72086	6.20777	0.341915	0.246899	0.954082	0.857906	-0.49122	0.979092	0.268346	12.2265	0.0357839	4.97064	0.0716536	3.49792	13.4731	3.92325	12.8571	0.459184	0.392857	2.92857	14.4592	148.357	2.64286	451.571
38.nii.gz	-25.0875	37.7953	2.24589e+07	4.12366	29.8202	2.73856	59.5022	3.14103	18.3671	0.291861	-46.0867	105.589	12.5667	304.012	0.414881	179671406	0.0648106	529.079	144.01	6665.54	17.7185	47.7327	18.0862	0.446852	3.29135	2.91769	5.82936	0.35012	0.260837	0.966573	0.878888	-0.385793	0.970519	0.286584	11.6809	0.0152979	6.31318	0.0346958	4.36894	16.4547	5.83428	64.7942	0.266643	1.16154	15.749	21.0191	144.202	6.41564	884.35
39.nii.gz	-16.9057	24.9254	1.04207e+07	3.58154	20.2038	2.92801	38.2004	6.00066	12.021	6.29348	-33.2081	71.4085	8.1538	306.398	-0.360798	8.33653e+07	0.0982875	243.406	78.5814	855.136	5.62391	15.7529	14.7617	0.00103982	3.0656	2.80166	4.92728	0.352174	0.259412	0.944334	0.8429	-0.354446	0.947583	0.285006	8.84916	0.0240635	5.60986	0.050149	3.60666	7.62866	5.12632	28.1712	0.253794	1.19601	10.9099	9.74401	85.3243	6.98198	603.973
4.nii.gz	-21.2514	24.9336	2.43178e+07	3.66896	20.2929	3.36626	36.4513	5.912	13.8831	10.3479	-49.9046	86.3559	9.29688	306.417	-0.91899	9.72713e+07	0.0956605	309.032	153.229	5526.68	-243.969	38.4535	5.25949	0.756347	1.65085	2.35759	2.46484	0.512638	0.456388	0.984887	0.921408	-0.260716	0.915893	0.435351	12.0383	0.0206131	6.21685	0.0593151	4.39457	10.9282	5.57634	58.7606	0.226875	1.6794	24.7761	12.5665	148.347	8.35135	1420.85
40.nii.gz	-15.7035	42.5625	5.89344e+07	4.08337	34.5389	2.30241	64.7112	16.0894	18.4022	19.0539	-44.883	109.594	13.8031	316.858	-0.332752	4.71475e+08	0.0658127	486.787	182.387	4577.66	-110.399	35.623	39.7319	-0.0627323	4.92357	3.31038	10.0657	0.310762	0.229106	0.931428	0.83394	-0.270505	0.935362	0.210182	13.5368	0.0109441	6.96191	0.0288403	4.26643	18.8387	6.431	104.881	0.178672	3.67977	38.632	19.4665	181.411	14.5911	3060.91
41.nii.gz	-60.1238	42.3334	3.4702e+08	4.96425	59.0827	2.33152	101.525	-9.56587	32.3688	-9.66422	-125.229	226.754	24.2217	293.008	0.0171354	2776161986	0.0353416	1501.61	593.737	76629.9	293.401	174.576	55.2082	0.513579	5.66518	3.84541	19.804	0.270829	0.182083	0.976979	0.899257	-0.113551	0.755953	0.18483	23.7426	0.00210343	9.29827	0.00586619	5.7148	57.446	7.19036	919.703	0.227537	1.98512	142.851	60.2209	664.539	8.59772	4997.64
42.nii.gz	-54.2711	1.12311	3.18863e+06	3.32507	21.3401	3.40888	4.33539	-18.394	15.9688	-12.001	-76.83	81.1654	10.9951	282.34	-1.16697	2.5509e+07	0.115	413.839	186.411	8778.62	-417.315	51.8487	7.66233	0.738452	2.057	2.50562	3.32157	0.47012	0.403451	0.975572	0.899892	-0.451313	0.972285	0.377751	13.2423	0.039556	5.01921	0.112269	3.79721	14.8777	4.23418	11	0.275	1.71	4.6	16.54	182.95	6.55	1577.95
43.nii.gz	0.763232	48.7065	1.75748e+07	3.91584	27.5764	3.40428	78.1359	25.721	16.3135	26.7203	-46.7898	124.926	11.4099	326.364	-0.139023	1.40598e+08	0.077686	419.558	266.374	3519.4	11.7888	28.3568	22.6321	0.0126075	3.88357	2.9356	6.08094	0.313615	0.219203	0.968945	0.877177	-0.45189	0.975996	0.222015	16.2746	0.0230319	5.65576	0.0419134	3.79778	12.7472	5.53517	46.9758	0.284702	1.4231	12.8182	16.7313	262.176	6.47879	1721.51
44.nii.gz	-18.8633	25.9389	1.2895e+07	3.58065	23.2108	2.37741	38.6525	1.992	12.999	-0.666418	-25.5498	64.2024	9.36936	302.414	0.368117	1.0316e+08	0.0925004	254.814	42.415	1436.17	61.6711	21.9043	12.7332	0.256173	2.74465	2.84487	4.82134	0.389261	0.304327	0.945813	0.850079	-0.259608	0.908761	0.316175	6.32833	0.0193956	5.94679	0.0422361	3.9355	8.65938	5.31033	29	0.205674	2.06247	13.0426	10.4002	58.5106	9.59574	399.773
45.nii.gz	-20.8231	64.893	8.81384e+07	4.69178	44.0034	3.01241	120.719	21.888	26.1268	22.8939	-88.7841	209.503	18.377	323.539	-0.23986	7.05107e+08	0.0447357	1065.53	556.423	36365.7	21.7355	113.019	51.7657	0.375738	5.22922	3.65757	20.8891	0.28734	0.197052	0.975088	0.899748	-0.25764	0.951359	0.203519	23.2603	0.00453625	8.09656	0.01357	5.25967	41.1962	6.61639	215.088	0.255449	1.57171	37.6675	42.716	565.181	6.86936	4138.91
46.nii.gz	-41.3593	14.6119	4.46195e+06	3.89834	35.9664	2.80629	24.0203	-10.6584	17.6203	-5.68453	-70.2249	94.2451	12.1534	290.151	-0.63122	1.78478e+07	0.0736917	469.216	190.107	9817.09	-248.836	61.4426	9.4879	0.732239	2.46062	2.55024	3.25702	0.389474	0.303534	0.977956	0.896066	-0.475393	0.987065	0.353221	13.3082	0.018132	5.91143	0.0345779	4.40254	17.7326	4.53699	22.2075	0.41901	0.418654	3.90566	18.8281	196.774	3.11321	691.151
47.nii.gz	5.46386	61.9076	1.89633e+07	4.01425	28.8499	3.19901	79.4191	36.2453	17.6544	39.4318	-38.6432	118.062	12.4648	336.976	-0.685763	1.51707e+08	0.0714619	491.896	259.429	4000.95	-132.629	29.8128	28.8287	-0.0416578	4.37111	3.2112	8.17661	0.29303	0.198311	0.95534	0.855716	-0.342527	0.957751	0.199671	16.0962	0.0167116	6.20386	0.0422816	4.0341	14.6604	5.54748	43.5269	0.26064	1.57446	11.9341	19.6014	267.617	6.61677	1924.41
48.nii.gz	-3.71562	53.1592	8.5821e+07	4.21775	36.5997	2.74502	94.4953	24.8576	19.2547	25.0115	-37.4136	131.909	14.066	325.704	0.0436235	6.86568e+08	0.0624999	550.398	197.479	9558.19	16.8016	57.3462	20.6705	0.454825	3.5142	3.15796	7.12669	0.347701	0.257957	0.974071	0.892115	-0.176709	0.852726	0.250764	13.722	0.00763253	7.5188	0.0219772	4.84035	19.5042	6.59504	136.098	0.168229	3.42501	50.5624	22.1134	203.713	13.7936	2761.07
49.nii.gz	-17.2166	44.0267	3.67052e+06	3.63256	29.4796	2.32934	52.685	9.98703	18.1753	9.00243	-32.7074	85.3924	12.998	310.793	0.165343	1.46821e+07	0.0844875	500.546	114.679	8602.95	-19.2364	59.397	19.9691	0.497147	3.4773	2.9196	6.90725	0.354778	0.265679	0.947388	0.85139	-0.494608	0.985591	0.243045	10.2382	0.024458	5.46637	0.0433519	3.97266	19.8415	3.95794	15.1053	0.397507	0.457064	3.21053	20.4051	109.658	3.47368	408.184
5.nii.gz	17.385	87.5916	6.26679e+06	3.88058	49.8786	1.71165	96.7955	49.3982	25.4317	54.1936	-2.47183	99.2674	21.2616	350.54	0.0757794	5.01343e+07	0.0803537	799.061	134.973	5413.54	-72.7034	37.9925	90.9528	-0.373589	8.40973	2.61061	8.20592	0.18629	0.107839	0.842747	0.732899	-0.653247	0.992953	0.10557	12.1592	0.0530754	4.54523	0.0909462	3.17161	32.2363	4.54478	19.9412	0.391003	1.01346	4.09804	31.4102	160.745	4.05882	557.294
50.nii.gz	10.4601	53.2056	8.77354e+06	3.58432	23.7307	2.64218	67.5987	34.9786	13.5677	37.0786	-5.23014	72.8289	9.78242	335.382	-0.446228	7.01883e+07	0.0920447	270.634	98.7566	1666.89	-63.0391	24.6295	13.6891	0.276916	3.00887	2.61945	4.30701	0.355323	0.260329	0.952729	0.851997	-0.498566	0.974479	0.264614	9.79082	0.0367324	4.99013	0.0610786	3.3605	9.57967	4.97254	21.1795	0.271532	1.59895	7.17949	11.0703	101.077	6.46154	724.59
51.nii.gz	-14.4845	57.4506	4.62145e+06	3.86767	50.8027	1.94874	60.8119	26.6663	23.7524	35.9188	-27.4882	88.3	18.13	327.835	-0.57112	3.69716e+07	0.0730124	764.804	176.665	16490.7	-587.803	82.1247	23.9208	0.541843	3.78657	3.08785	8.88823	0.324627	0.238754	0.944213	0.847943	-0.506789	0.988949	0.298381	12.73	0.0216532	5.67227	0.0444922	4.17154	26.5114	4.24592	21.6977	0.504597	0.289886	3.13953	30.3061	170.977	2.30233	355.209
52.nii.gz	-11.5085	36.7408	3.91122e+07	3.95735	26.7782	4.49763	61.2963	15.5884	16.1761	19.6313	-73.4654	134.762	10.8105	316.277	-0.905364	3.12897e+08	0.0803566	435.09	382.139	6462.82	-204.706	36.6942	18.6212	0.311695	3.29984	3.12506	7.06055	0.365954	0.280779	0.977913	0.901152	-0.184379	0.859844	0.27761	19.4311	0.0117005	6.89048	0.034277	4.40268	13.8288	6.10803	66.6522	0.170466	3.48695	31.4194	17.5408	364.11	13.399	5533.2
53.nii.gz	25.1614	77.0991	9.82997e+06	3.84857	27.0867	3.17984	86.4746	49.9752	15.6747	49.9624	-4.52197	90.9966	11.0095	350.535	-0.528062	7.86398e+07	0.079375	392.006	153.792	2896.9	-92.9923	30.8999	21.5927	0.191153	3.78999	2.83158	5.7059	0.310772	0.214693	0.947737	0.84475	-0.514989	0.983982	0.23211	12.3054	0.0277481	5.36178	0.0470495	3.72008	13.1231	4.99519	25.175	0.314688	0.825	6.35	15.4736	148.588	4.825	715.188
54.nii.gz	-5.36182	35.0256	1.29805e+07	3.61593	21.963	2.96358	48.2862	13.1735	12.8838	12.1536	-29.9123	78.1985	8.86978	313.587	-0.123955	1.03844e+08	0.0927456	259.245	73.7478	1408.08	34.8284	19.6811	15.5877	0.118276	2.90601	2.8679	6.59334	0.39067	0.305995	0.950684	0.860796	-0.316688	0.938201	0.299418	8.52342	0.0220959	5.84425	0.0561317	3.77108	8.81721	5.30641	26.1667	0.198232	3.92332	12.2424	10.5364	93.8712	12.7424	880.432
55.nii.gz	10.0914	40.5656	1.05788e+06	2.64644	25.0539	1.51892	46.1971	24.9816	12.0913	22.8294	8.25027	37.9468	10.3707	325.251	0.231043	8.46306e+06	0.18	175.227	24.1845	410.072	-2.65401	14.0105	14.8786	-0.0421164	3.21905	1.97256	4.10283	0.336022	0.239688	0.864525	0.759075	-0.67337	0.982789	0.254059	4.93571	0.0962415	3.42333	0.131548	2.33761	7.22228	2.92193	5.2	0.52	0.24	1.8	6.84	26.2	2.2	58
56.nii.gz	-23.4063	15.3527	706711	2.5	17.8056	2.01371	15.7759	-3.14978	11.9211	-2.16565	-28.613	44.3889	8.4967	297.219	-0.346465	2.82684e+06	0.1875	218.786	41.9917	1023.99	-59.4909	19.0224	19.4708	0.0236673	3.82083	1.56554	3.57743	0.279306	0.172331	0.857339	0.741679	-0.767593	0.986256	0.201117	6.48542	0.137917	2.9072	0.172917	1.9572	9.62332	2.5	5	0.625	0.1875	1.5	9.35938	43.875	1.75	118.875
57.nii.gz	1.40444	66.6465	1.29151e+07	3.99365	35.1678	2.52337	76.8469	38.6563	20.6229	44.7929	-19.8462	96.6931	14.6283	339.579	-0.684664	103321090	0.0695153	625.62	182.907	9064.77	-319.238	51.8605	30.4843	0.275632	4.14102	3.2906	11.5954	0.324446	0.234696	0.939031	0.845163	-0.351114	0.965266	0.236958	13.3241	0.0140438	6.37188	0.0358456	4.37221	20.5862	5.46795	26.7857	0.239158	2.33929	7.78571	24.681	173.652	8.58929	1882.83
58.nii.gz	-13.7153	25.4665	5.48513e+06	3.62266	21.8379	2.90748	48.1413	7.06708	13.3268	7.22079	-30.4336	78.5749	9.15178	307.524	0.0650591	9.65382e+07	0.0945303	280.963	76.8878	3328.03	16.7171	34.9886	13.176	0.451754	2.89072	2.8553	4.53979	0.371935	0.28081	0.959384	0.864459	-0.370435	0.964964	0.278028	8.45137	0.0198658	5.88994	0.0521848	4.13009	12.0411	4.42705	21.8276	0.376338	0.838288	5.48276	11.9587	90.1897	3.93103	342.603
59.nii.gz	-73.0889	57.5705	890962	2.72548	64.5973	2.01499	60.8155	10.5837	43.6302	37.9339	-74.3926	135.208	36.0715	314.636	-0.739616	2.04921e+07	0.160494	2533.56	365.592	101830	-1699.03	176.077	193.983	-0.0374187	10.325	1.96006	75.3608	0.206409	0.129013	0.850749	0.769967	-0.808049	0.992321	0.147327	19.1625	0.11875	3.10172	0.129167	2.04339	92.5152	2.72548	5.88889	0.654321	0.17284	1.44444	100.025	408.222	1.66667	408.889
6.nii.gz	-4.73265	48.7451	6.88642e+06	3.98588	32.5097	2.65208	62.7694	19.8364	18.1909	19.8337	-40.5073	103.277	13.0701	320.597	-0.125496	5.50913e+07	0.0701715	487.018	204.134	8811.74	-36.9749	61.9139	8.0393	0.767895	2.17718	2.49777	3.13124	0.433498	0.35448	0.984293	0.914716	-0.450729	0.98423	0.356771	13.8079	0.0180109	6.04575	0.0447733	4.55456	17.4883	5.01736	20.9403	0.312542	0.880374	4.70149	19.35	199.791	4.8209	912.925
60.nii.gz	-34.8939	42.8766	4.3235e+07	4.54014	38.7363	2.91616	73.0828	4.82279	23.2798	5.97081	-85.2991	158.382	15.979	306.244	-0.323943	3.4588e+08	0.0502397	868.366	411.201	25449.6	-72.0976	92.4528	32.7931	0.475521	4.34292	3.52321	13.1399	0.311481	0.220856	0.972803	0.891688	-0.22037	0.924945	0.226292	19.9062	0.00497917	7.96143	0.0141846	5.16113	31.3115	6.49099	103.59	0.224707	2.11569	23.1605	34.8858	413.403	8.83514	3703.62
61.nii.gz	8.08677	45.0728	986958	2.41938	13.3929	2.88454	65.419	30.6965	13.0824	31.3235	1.75162	63.6674	7.84283	331.153	0.205211	1.73705e+07	0.209877	301.83	47.35	481.023	1.45452	13.3922	17.6	-0.177699	3.08333	2.10345	7.73889	0.442259	0.377099	0.92644	0.841458	-0.555358	0.937599	0.272074	6.94167	0.139861	2.97845	0.225	2.20345	7.74806	2.41938	3.22222	0.358025	0.765432	1.88889	12.6667	57.1111	4.33333	251.778
62.nii.gz	11.8319	34.9343	743742	1.95021	15.1913	1.72507	35.2791	25.8178	8.27297	28.6764	10.6095	24.6695	6.41838	325.958	-0.612673	1.30899e+07	0.265306	91.6857	17.2	21.5187	0.902519	3.41222	6.03333	-0.211096	1.96667	1.37296	1.62889	0.444444	0.376727	0.877866	0.778066	-0.64035	0.941161	0.443898	4.19167	0.189722	2.48963	0.2375	1.52296	2.36139	1.95021	3.57143	0.510204	0.244898	1.85714	3.34694	17.1429	2.71429	52.2857
63.nii.gz	-3.0523	52.8902	3.6394e+06	3.66375	31.0655	2.13193	67.8564	26.5126	16.5747	26.7815	-7.63675	75.4932	11.5745	327.172	0.0098504	2.91152e+07	0.0951557	430.829	80.1235	3624.9	-45.0585	38.7515	24.6205	0.215607	4.07703	2.63197	7.08321	0.292716	0.198042	0.920737	0.812179	-0.688777	0.995507	0.240022	8.73015	0.0448243	4.62443	0.0720259	3.18165	15.843	4.1607	13.5294	0.397924	0.560554	3.23529	16.987	77.7353	3.47059	235.147
64.nii.gz	-29.3226	61.8559	1.78231e+07	4.45663	41.9847	3.19661	73.9699	23.9503	27.2679	34.8595	-79.044	153.014	18.8303	325.714	-0.908939	142584587	0.056335	1145.93	527.542	47994.1	-1295.39	109.01	46.3665	0.403406	5.01288	3.62457	19.2858	0.302781	0.217169	0.958952	0.873258	-0.365855	0.97725	0.223144	22.6225	0.00958023	6.98936	0.0289347	4.81766	38.844	5.89118	40.8452	0.243126	2.3655	9.46429	45.6658	498.494	8.32143	5187.38
65.nii.gz	3.89787	48.276	3.86757e+07	3.88383	21.4631	6.72681	72.4839	24.8613	14.7723	27.2311	-71.1723	143.656	8.97128	325.516	-1.28733	3.09406e+08	0.0854269	426.056	440.117	9705.25	-223.614	37.5618	16.7753	0.382469	2.92225	3.03793	8.00156	0.396025	0.313725	0.983092	0.917251	-0.177814	0.854285	0.306482	20.8544	0.0115382	6.85699	0.0323833	4.43736	13.5843	6.21235	53.7562	0.147277	4.80057	31.1808	16.9566	436.589	17.4274	7642.95
66.nii.gz	-7.55285	69.9873	5.84145e+06	4.18325	40.9284	2.16268	84.7509	33.9497	23.9995	38.1436	-25.8164	110.567	17.485	335.165	-0.276048	4.67316e+07	0.0606509	813.097	218.222	16612.2	-352.423	77.5751	58.9737	0.13623	6.14176	3.36151	18.4172	0.23428	0.137948	0.913251	0.807361	-0.638435	0.997023	0.137241	14.6063	0.0228028	5.54483	0.0448379	4.02205	34.1372	4.73381	21.5	0.413462	0.751479	3.15385	32.4567	208.019	3.61538	853.865
67.nii.gz	1.105	19.4964	1.24627e+06	2.35353	14.8523	3.67702	22.9065	9.45125	8.40026	10.898	-16.8474	39.7539	5.43446	309.624	-0.964782	2.19344e+07	0.218935	107.193	43.6027	101.126	-7.72572	5.42339	4.78125	-0.0187594	1.74058	1.71195	1.6859	0.465832	0.397929	0.949239	0.849765	-0.419185	0.913563	0.443418	6.58705	0.0930448	3.5216	0.125992	2.52232	2.55116	2.77736	6.23077	0.47929	0.331361	2.84615	4.02367	42.8462	3.46154	157.462
68.nii.gz	5.84974	62.511	1.11985e+07	3.94329	26.7395	2.32937	77.2067	34.027	16.5565	33.9672	-7.22608	84.4328	12.0292	334.642	-0.0230563	8.95882e+07	0.0738	411.223	115.97	4247.49	-46.145	41.7143	18.6887	0.378085	3.45012	3.03257	6.52432	0.331441	0.235134	0.950204	0.850601	-0.368191	0.969565	0.245162	10.4935	0.014501	6.31317	0.0391049	4.35964	15.1007	5.20472	25.5	0.255	1.83	7.38	16.3939	103.07	7.12	928.87
69.nii.gz	-15.0042	43.409	5.72137e+07	4.19071	28.8036	3.64229	81.3481	17.3298	18.4733	21.2371	-74.7005	156.049	12.209	318.219	-0.667781	4.57709e+08	0.0672159	564.971	390.505	11979.4	-247.623	54.0429	19.3304	0.465556	3.21828	3.16395	8.59799	0.372885	0.288611	0.982576	0.9145	-0.170773	0.856779	0.296168	19.5399	0.00834935	7.38287	0.0250928	4.77126	18.3433	6.47224	93.9664	0.166312	3.56853	37.977	22.8938	382.281	14.0478	5908.42
7.nii.gz	-0.132715	31.7095	4.14962e+06	3.1825	24.268	2.28116	37.5692	17.8694	11.0988	21.5975	-14.841	52.4103	8.6955	318.136	-0.480708	3.3197e+07	0.118382	169.407	62.5358	659.197	-34.2505	16.4031	7.09698	0.385468	2.13201	2.40415	2.44887	0.420981	0.343118	0.949196	0.849232	-0.318936	0.923407	0.398984	7.75881	0.0329388	5.09123	0.0700767	3.48866	5.87501	4.16195	15.8293	0.38608	0.9768	4.85366	6.80785	57.878	3.97561	315.634
70.nii.gz	-19.7719	34.8958	1.63805e+06	3.17512	33.0531	2.09596	45.0222	9.72154	16.9986	15.586	-27.9633	72.9855	12.0471	310.412	-0.266296	3.60371e+07	0.121107	428.454	92.8547	3199.21	-106.574	36.794	26.5087	0.13997	4.26553	2.44975	6.50585	0.273349	0.182909	0.915089	0.805076	-0.622563	0.989107	0.285577	9.49812	0.0534623	4.28796	0.0752914	2.99552	15.8257	3.33718	13.4706	0.792388	0.103806	2.05882	17.0519	91.8235	1.35294	134.529
71.nii.gz	-27.5155	18.9997	1.91528e+07	3.8198	24.6217	3.15489	39.9063	-2.80757	14.9055	-1.41677	-63.1639	103.07	10.2522	297.775	-0.399535	153222178	0.0832047	346.898	187.034	3575.88	-65.0061	34.3502	17.2491	0.331341	3.20869	3.05945	6.15488	0.362585	0.2751	0.965192	0.876888	-0.213566	0.890129	0.28037	13.5175	0.0121886	6.68323	0.0321012	4.3754	12.8998	5.73535	42.8519	0.198388	2.67558	17.9722	13.9125	181.231	11.5648	2305.81
72.nii.gz	-32.0231	27.1966	1.13426e+07	4.00078	38.9755	2.20996	37.9736	0.287858	20.5012	6.65939	-57.2193	95.1929	15.7313	301.233	-0.51102	9.07411e+07	0.069312	568.289	143.631	5111.61	-180.051	37.295	55.1824	-0.161665	6.38979	2.98913	5.88597	0.223816	0.134811	0.88873	0.774224	-0.493327	0.986549	0.130436	12.1555	0.0204046	5.83893	0.0412849	3.87688	23.1193	5.50364	34.472	0.275776	1.1849	8.664	22.8892	179.84	5.816	1130.34
73.nii.gz	-55.7227	33.9782	1.55448e+06	3.52193	35.2358	2.48775	36.2624	-22.9733	25.1133	-29.6929	-71.4454	107.708	17.7296	278.79	0.523096	1.24358e+07	0.1	980.176	138.955	28000.6	507.857	104.816	20.7654	0.650105	3.66795	2.67247	5.91883	0.336878	0.244875	0.963993	0.871093	-0.660443	0.993865	0.223122	10.8583	0.0451479	4.58828	0.0826923	3.43873	31.3953	3.72193	8.4	0.42	0.44	2	39.3475	159.25	3	432.15
74.nii.gz	-69.831	-35.4614	846012	2.84237	18.2661	2.00092	-30.1695	-54.5297	10.9136	-55.1199	-72.904	42.7345	7.43967	245.824	0.393009	6.76809e+06	0.153061	173.724	20.3792	366.726	25.7919	11.5809	8.77153	0.163017	2.43681	2.10686	2.16173	0.387184	0.292952	0.913175	0.803183	-0.575277	0.978079	0.300995	4.43507	0.0704552	3.896	0.0961806	2.54864	5.08811	3.03915	6.14286	0.438776	0.387755	2.14286	6.22959	27.7857	2.85714	73.2143
75.nii.gz	-76.4067	-7.76882	614549	2.9477	48.946	2.08443	-7.30254	-40.4032	25.7765	-31.0141	-97.823	90.5204	19.7135	261.311	-0.61593	2.4582e+06	0.135802	892.726	180.225	17341.1	-490.096	94.3681	27.4417	0.573871	4.30833	1.30345	4.96806	0.27123	0.167766	0.935823	0.827607	-0.861383	0.995402	0.198886	12.7792	0.115972	3.16178	0.133333	2.12011	30.4524	2.9477	5.88889	0.654321	0.17284	1.22222	36	188.111	1.66667	428.778
76.nii.gz	-61.0437	-21.7453	906626	2.87314	18.3428	2.98515	-13.4975	-36.4227	13.0296	-32.7915	-72.6506	59.1531	6.49778	264.084	-0.906251	3.62651e+06	0.147929	267.494	70.9826	1791.7	-85.7593	26.001	10.8874	0.421786	2.78621	1.94775	2.50145	0.344611	0.244736	0.943398	0.833492	-0.674538	0.987654	0.292061	8.19717	0.0787751	3.74482	0.110367	2.61535	9.2221	3.08506	7.46154	0.573964	0.213018	1.92308	10.4852	78.2308	1.92308	180.231
77.nii.gz	-29.3677	14.0895	1.87118e+06	3.48171	22.282	1.96863	20.072	-8.86337	14.8066	-9.4092	-40.8484	60.9204	10.6774	291.64	0.0783985	1.49695e+07	0.103306	293.304	76.0025	2108.18	-26.3333	33.0364	13.4847	0.420114	3.02991	2.53085	3.86061	0.336725	0.243368	0.940746	0.833676	-0.601762	0.991357	0.314944	8.43223	0.038254	4.7636	0.0559261	3.39174	11.6303	3.78875	11.8182	0.53719	0.231405	2.27273	11.9256	71.6364	2.09091	170.091
78.nii.gz	-36.0994	10.0479	1.02033e+07	3.78964	19.7944	3.23026	34.889	-13.7065	13.7967	-13.6174	-59.0253	93.9143	8.97568	286.853	0.0099289	4.08132e+07	0.0850676	320.717	105.835	5038.07	9.93611	40.6593	5.67137	0.751193	1.87126	2.36858	2.01103	0.458982	0.386434	0.985023	0.914629	-0.322559	0.949066	0.399489	9.85316	0.0162553	6.24948	0.0412904	4.51546	11.5827	5.15079	35.4032	0.28551	1.05177	10.5484	12.8603	107.452	5.51613	567.226
79.nii.gz	-6.24512	56.1519	1.59416e+06	3.64022	49.7711	1.5897	68.5625	24.9313	23.9616	20.3381	-14.748	83.3105	19.0981	326.002	0.0354521	1.27533e+07	0.0844444	696.823	98.9938	6717.91	-57.471	60.3325	32.225	0.297327	4.775	2.72895	8.2375	0.24961	0.15182	0.9093	0.795827	-0.788361	0.997883	0.211861	9.5875	0.054375	4.21645	0.065625	3.14145	23.1394	3.64022	11.5333	0.768889	0.115556	1.26667	26.1067	100.067	1.4	167.667
8.nii.gz	-5.89003	56.4916	1.26198e+07	4.10043	31.2973	3.00619	83.4498	31.7026	20.8834	40.4077	-33.7917	117.242	13.9647	332.716	-0.743571	1.00958e+08	0.0767929	673.222	222.978	11965.2	-403.262	55.1508	20.6171	0.463588	3.42008	3.05907	7.96741	0.363455	0.277774	0.967984	0.884753	-0.419245	0.977028	0.268775	14.6388	0.0200908	5.96136	0.0498451	4.18024	18.942	5.35049	27.7544	0.24346	2.47799	8.75439	27.3136	219.404	8.77193	2330.68
80.nii.gz	-25.8537	12.0109	2.78166e+06	3.20778	19.9602	3.03044	36.7806	-0.831833	12.223	2.68072	-33.6801	70.4608	8.85122	299.551	-0.193902	2.22533e+07	0.121748	229.462	57.7696	1360.12	-41.1241	21.1726	10.4746	0.341599	2.58125	2.64104	3.62762	0.392568	0.303085	0.958752	0.863026	-0.425406	0.963577	0.296541	7.42063	0.0376917	4.8832	0.0689583	3.50907	7.91181	4.10695	11.7742	0.379813	1.07804	3.77419	9.3257	63.4194	4.22581	335.871
81.nii.gz	-48.5587	-14.2258	1.08218e+06	3.00624	18.7277	1.94886	-9.51189	-31.7109	10.721	-34.2191	-52.0607	42.5488	7.53039	268.599	0.130608	4.32872e+06	0.137778	166.38	35.7787	511.767	0.496939	16.1056	10.9931	0.203168	2.85354	2.10451	2.27706	0.331471	0.22866	0.909682	0.79112	-0.615728	0.981546	0.286523	5.8709	0.069998	3.9252	0.109533	2.61245	6.77466	3.00624	9.13333	0.608889	0.195556	2.06667	7.04	36.2	1.8	70.2
82.nii.gz	-29.1548	39.7034	7.4112e+06	4.17897	35.834	2.73627	53.3532	5.17433	21.4014	2.71493	-68.3486	121.702	15.6143	306.288	-0.312771	5.92896e+07	0.0655344	681.265	281.73	8887.26	-26.4125	53.0349	18.8896	0.420988	3.50816	2.74761	5.96484	0.340196	0.249969	0.971726	0.883881	-0.621837	0.992376	0.249492	16.5229	0.0445359	4.90105	0.0753619	3.59952	17.9811	5.26866	24.0127	0.303958	1.45425	5.17722	27.2354	268.861	5.60759	1495.49
83.nii.gz	-54.4101	-17.7523	633470	2.72548	28.3669	2.01334	-12.7475	-35.1934	13.7566	-32.1658	-64.7974	52.0499	9.81317	265.303	-0.432459	2.53388e+06	0.160494	263.086	51.7917	897.869	-40.8825	20.6701	19.25	0.0116733	3.70833	2.01103	4.30903	0.287723	0.182365	0.879991	0.766155	-0.74883	0.989411	0.224657	7.16667	0.107639	3.25081	0.125	1.95915	9.98003	2.72548	5.88889	0.654321	0.17284	1.44444	10.6914	53.6667	1.66667	59.6667
84.nii.gz	-40.3274	-22.8976	870000	2.18872	9.77768	1.66073	-22.0897	-30.8193	5.79851	-31.8292	-40.8114	18.7217	4.10751	269.258	-0.135596	3.48e+06	0.236111	41.7578	11.5196	23.1233	-0.345138	3.40133	3.31607	0.0117557	1.51964	1.29336	0.955855	0.472798	0.412763	0.896847	0.78441	-0.476468	0.930872	0.528869	3.3875	0.10956	3.27345	0.152679	2.22345	1.67935	2.75163	5.5	0.458333	0.416667	2.83333	1.85417	12.4167	2.66667	46.0833
85.nii.gz	-69.5142	9.70269	2.54664e+06	4.02895	43.6198	2.22452	19.7368	-23.9718	26.9095	-13.6224	-94.6789	114.416	19.7524	277.797	-0.539504	2.03732e+07	0.0707071	979.452	308.227	9987.53	-239.046	49.1102	26.9903	-0.00477688	4.17504	2.21089	7.07219	0.281748	0.186823	0.954922	0.856617	-0.750449	0.984861	0.268016	17.3219	0.109938	3.89638	0.124823	2.60985	19.0251	4.41546	17.7273	0.53719	0.292011	2.33333	39.7741	256.667	2.15152	632.485
86.nii.gz	-6.45453	44.7857	2.98627e+07	4.0739	29.3988	4.82604	76.1138	20.6518	17.6761	23.5686	-72.6909	148.805	12.2261	321.452	-0.886522	2.38902e+08	0.0712515	513.71	416.932	6347.15	-101.356	37.9711	25.0071	0.181915	3.77178	3.28626	9.96921	0.335983	0.247283	0.976252	0.898724	-0.226446	0.909547	0.261024	20.3382	0.0103236	6.95279	0.0301197	4.45059	15.7446	5.94994	64.654	0.223716	2.49999	20.5917	20.5515	405.879	9.14533	4267.82
87.nii.gz	-2.85715	37.1085	996379	2.44644	18.1831	1.85074	38.6501	15.3228	12.6885	9.66475	-4.60067	43.2508	10.3479	315.655	0.338602	3.98552e+06	0.2	209.485	27.7929	453.941	-6.45764	14.7747	19.0667	-0.144717	3.65476	2.06968	5.58991	0.313897	0.212545	0.837369	0.736988	-0.633116	0.975175	0.198764	5.37262	0.108288	3.26857	0.152381	2.25428	8.46033	2.72193	5.2	0.52	0.24	2	8.04	29.2	2.2	83.2
88.nii.gz	-43.4681	5.30115	1.78739e+06	3.51603	22.7816	4.76288	11.9887	-15.9435	17.5385	-8.94932	-86.7583	98.747	9.61954	285.035	-1.4338	7.14958e+06	0.0991736	557.078	265.503	14770.6	-599.481	57.7829	16.6312	0.55869	3.22344	2.77546	5.83295	0.33783	0.243823	0.966153	0.875372	-0.622536	0.99152	0.288659	15.9735	0.0444271	4.57347	0.0674188	3.14673	18.6035	3.64125	11.9091	0.541322	0.322314	2.18182	22.3079	256.955	2.18182	644.318
89.nii.gz	-46.3063	-4.70448	1.72819e+06	2.42334	11.419	2.98738	-3.19194	-20.0473	10.2635	-16.1244	-48.254	45.062	4.81588	280.275	-0.998277	1.38255e+07	0.235537	180.621	50.9731	815.68	-53.9908	15.9705	8.4613	0.329501	2.22517	2.11146	3.03245	0.449853	0.373519	0.930975	0.835988	-0.414527	0.925484	0.322724	7.00656	0.0803109	3.84014	0.151112	2.83757	6.10795	3.42512	6.45455	0.293388	0.900826	5.18182	7.24793	48.9091	5.27273	304.909
9.nii.gz	-4.18231	45.9824	1.06287e+07	3.74629	29.0104	2.33789	56.7873	25.4633	15.766	30.9029	-16.5416	73.3289	11.6331	326.016	-0.582053	8.50292e+07	0.085	360.135	109.125	2859.98	-101.509	32.5446	12.1836	0.419154	2.64064	2.65398	4.51731	0.40062	0.319422	0.959135	0.869817	-0.382923	0.963069	0.336864	10.1952	0.0229557	5.68834	0.0530726	3.99256	11.1821	5.22272	21.86	0.2186	2.8044	8.5	14.9756	107.52	9.88	1344.98
90.nii.gz	-55.2171	-29.5212	336565	1.92193	22.59	1.2303	-28.228	-40.8199	11.3623	-34.3651	-55.9945	27.7664	9.39467	259.447	-0.333936	1.34626e+06	0.28	138.628	13.1667	153.617	-15.4815	5.36806	20.5417	-0.490703	4.04167	0.479574	0.118056	0.289881	0.195199	0.733326	0.662078	-0.852629	0.953795	0.196424	4.10417	0.305556	1.81291	0.333333	0.896241	6.47743	1.92193	2.6	0.52	0.24	1.4	5.84	25.2	2.2	68.4
91.nii.gz	4.56717	42.2394	3.90912e+06	3.40753	22.3898	2.82373	52.1413	24.6674	12.5072	28.7881	-13.0052	65.1465	8.40401	325.042	-0.620037	1.56365e+07	0.110299	243.066	80.0281	781.059	-41.7469	16.521	13.8633	0.0862913	2.91821	2.74399	4.7939	0.372359	0.285042	0.940995	0.841702	-0.427185	0.968213	0.303996	8.90687	0.0328253	5.11597	0.0734243	3.43004	7.59609	4.29053	15.2703	0.41271	0.660336	4.08108	9.86267	80.5135	3.37838	304.73
92.nii.gz	-44.0873	-6.47227	3.77033e+06	2.85394	14.8849	2.87811	4.29022	-20.0572	10.6619	-16.4808	-49.912	54.2023	6.9173	280.265	-0.691873	1.50813e+07	0.163194	180.533	48.7974	1167.07	-63.7745	19.7726	3.56761	0.681216	1.41072	2.09117	1.45136	0.546872	0.492311	0.972933	0.894882	-0.311712	0.900856	0.410552	6.68824	0.0497192	4.67182	0.103714	3.60474	5.83505	4.32393	10.8333	0.225694	1.78993	7.83333	6.7079	48.6875	9.125	496.396
93.nii.gz	-41.3586	8.3352	2.11033e+06	3.53257	29.9452	1.92434	21.0414	-15.7311	16.3062	-12.7988	-46.2908	67.3321	12.4008	284.897	0.0536678	8.44131e+06	0.0976331	357.654	71.3619	2902.21	-41.557	37.843	19.3996	0.332671	3.78249	2.65503	4.4755	0.285895	0.180338	0.92609	0.810049	-0.566086	0.989422	0.206473	8.16952	0.0335748	4.95313	0.0553075	3.59208	14.3106	3.82525	15.3077	0.588757	0.289941	2.53846	14.3905	68.9231	2	144.154
94.nii.gz	-51.5376	-29.0012	1.28972e+06	2.58426	16.5352	3.45279	-25.414	-39.7228	9.79499	-35.0727	-70.6075	45.1935	6.91213	260.538	-1.02612	5.15889e+06	0.185596	135.876	64.1432	411.953	-35.8303	11.3313	5.03996	0.405432	1.57193	2.11191	2.49814	0.554416	0.495553	0.957585	0.878939	-0.380249	0.914404	0.331204	7.90959	0.0746118	3.88371	0.132617	3.01933	4.09282	3.51109	5.21053	0.274238	1.05817	3.52632	5.72299	62.3684	8.26316	629.105
95.nii.gz	0.304941	36.6246	4.12754e+06	3.26596	23.8581	2.2639	43.2298	20.8832	12.9146	25.8807	-14.5844	57.8142	10.0314	321.23	-0.519044	1.65102e+07	0.12	222.493	69.4441	1241.22	-60.468	22.1058	9.0049	0.407489	2.35821	2.57361	3.11272	0.429664	0.351598	0.945629	0.849254	-0.361541	0.943248	0.327504	8.13254	0.0350256	5.10696	0.0835172	3.639	7.77767	4.01531	12.65	0.31625	0.7975	4.8	8.81	68.1	5	452.35
96.nii.gz	-21.8534	19.4955	1.06941e+07	3.51602	17.4689	3.32237	34.8317	0.642985	11.8959	2.00298	-43.1484	77.9801	7.62317	301.045	-0.582405	8.55531e+07	0.106291	242.03	104.161	2593.42	-73.715	27.6412	6.64362	0.609391	1.95017	2.45312	2.73432	0.456929	0.387245	0.97639	0.898439	-0.269121	0.917456	0.412624	9.94517	0.0207361	5.97185	0.0490435	4.18199	8.57121	4.88499	35.4915	0.300776	0.861821	12.5424	9.51975	102.364	5.0678	536.975
97.nii.gz	-20.6921	18.8533	4.27464e+06	3.17343	19.3545	2.70148	24.741	-5.03413	12.3505	-9.6655	-42.4004	67.1414	8.70734	295.36	0.278491	3.41971e+07	0.15202	232.632	79.7187	2171.06	71.2975	29.3718	3.8936	0.760689	1.35936	2.10685	1.94234	0.58034	0.532511	0.98171	0.918648	-0.477152	0.970588	0.389984	8.56426	0.0665552	4.68988	0.203457	3.77299	8.31635	4.60431	9.28571	0.189504	3.79425	7.44898	9.31029	81.0408	13.0408	857.49
98.nii.gz	-20.4021	55.1039	1.20639e+06	3.25163	45.4602	1.77856	58.0131	15.766	24.6497	16.7488	-30.1799	88.1931	16.3431	317.068	-0.0256707	9.6511e+06	0.111111	824.116	138.305	15711.9	-241.969	84.4269	37.8452	0.399437	5.10714	2.2977	8.39865	0.258203	0.15874	0.914373	0.803668	-0.786389	0.996243	0.143228	11.2411	0.0738467	3.78558	0.0855655	2.56832	30.568	3.25163	6.66667	0.555556	0.222222	1.33333	33.6875	149.25	2	379.75
99.nii.gz	-4.95832	41.003	1.6725e+06	3.07782	23.1387	3.72919	46.0328	22.6344	16.4538	28.7433	-32.9108	78.9436	10.9102	323.313	-1.2006	6.68999e+06	0.140625	438.123	166.517	5213.02	-268.862	38.8201	17.3956	0.373115	3.10846	2.49505	7.27832	0.386855	0.304916	0.94948	0.859989	-0.622208	0.987971	0.291735	12.6886	0.0583867	4.20376	0.105177	3.15982	14.0539	3.625	5.875	0.367188	0.8125	2.25	17	161	3.875	766.625
[truncated: 1,660 more columns]

## Sheet: PT_features
ID	log_sigma_2_0_mm_3D_firstorder_10Percentile	log_sigma_2_0_mm_3D_firstorder_90Percentile	log_sigma_2_0_mm_3D_firstorder_Energy	log_sigma_2_0_mm_3D_firstorder_Entropy	log_sigma_2_0_mm_3D_firstorder_InterquartileRange	log_sigma_2_0_mm_3D_firstorder_Kurtosis	log_sigma_2_0_mm_3D_firstorder_Maximum	log_sigma_2_0_mm_3D_firstorder_Mean	log_sigma_2_0_mm_3D_firstorder_MeanAbsoluteDeviation	log_sigma_2_0_mm_3D_firstorder_Median	log_sigma_2_0_mm_3D_firstorder_Minimum	log_sigma_2_0_mm_3D_firstorder_Range	log_sigma_2_0_mm_3D_firstorder_RobustMeanAbsoluteDeviation	log_sigma_2_0_mm_3D_firstorder_RootMeanSquared	log_sigma_2_0_mm_3D_firstorder_Skewness	log_sigma_2_0_mm_3D_firstorder_TotalEnergy	log_sigma_2_0_mm_3D_firstorder_Uniformity	log_sigma_2_0_mm_3D_firstorder_Variance	log_sigma_2_0_mm_3D_glcm_Autocorrelation	log_sigma_2_0_mm_3D_glcm_ClusterProminence	log_sigma_2_0_mm_3D_glcm_ClusterShade	log_sigma_2_0_mm_3D_glcm_ClusterTendency	log_sigma_2_0_mm_3D_glcm_Contrast	log_sigma_2_0_mm_3D_glcm_Correlation	log_sigma_2_0_mm_3D_glcm_DifferenceAverage	log_sigma_2_0_mm_3D_glcm_DifferenceEntropy	log_sigma_2_0_mm_3D_glcm_DifferenceVariance	log_sigma_2_0_mm_3D_glcm_Id	log_sigma_2_0_mm_3D_glcm_Idm	log_sigma_2_0_mm_3D_glcm_Idmn	log_sigma_2_0_mm_3D_glcm_Idn	log_sigma_2_0_mm_3D_glcm_Imc1	log_sigma_2_0_mm_3D_glcm_Imc2	log_sigma_2_0_mm_3D_glcm_InverseVariance	log_sigma_2_0_mm_3D_glcm_JointAverage	log_sigma_2_0_mm_3D_glcm_JointEnergy	log_sigma_2_0_mm_3D_glcm_JointEntropy	log_sigma_2_0_mm_3D_glcm_MaximumProbability	log_sigma_2_0_mm_3D_glcm_SumEntropy	log_sigma_2_0_mm_3D_glcm_SumSquares	log_sigma_2_0_mm_3D_gldm_DependenceEntropy	log_sigma_2_0_mm_3D_gldm_DependenceNonUniformity	log_sigma_2_0_mm_3D_gldm_DependenceNonUniformityNormalized	log_sigma_2_0_mm_3D_gldm_DependenceVariance	log_sigma_2_0_mm_3D_gldm_GrayLevelNonUniformity	log_sigma_2_0_mm_3D_gldm_GrayLevelVariance	log_sigma_2_0_mm_3D_gldm_HighGrayLevelEmphasis	log_sigma_2_0_mm_3D_gldm_LargeDependenceEmphasis	log_sigma_2_0_mm_3D_gldm_LargeDependenceHighGrayLevelEmphasis
1.nii.gz	-12.8329	23.5719	8.51716e+08	3.63015	17.1869	5.02744	70.4398	4.32438	11.6186	3.15158	-77.3759	147.816	7.37252	304.73	0.307841	6813729393	0.103314	247.135	304.27	4199.53	82.2368	29.2156	6.67719	0.623677	1.78518	2.47798	3.36931	0.504637	0.445958	0.993371	0.948304	-0.142792	0.7651	0.415396	17.281	0.0184141	6.58829	0.0446236	4.39664	8.97319	7.06026	838.89	0.091462	11.1664	947.599	9.98083	311.529	44.7968	13019.4
10.nii.gz	-3.99534	39.416	1.5195e+08	3.80195	20.2489	3.82735	69.7318	16.322	13.2221	15.8248	-65.2608	134.993	8.64707	316.802	-0.207037	1215599444	0.0886312	303.623	320.391	3546.07	6.3616	31.2568	9.38091	0.529618	2.25805	2.70014	4.01743	0.440165	0.365192	0.98866	0.929315	-0.140545	0.766887	0.359228	17.746	0.0142528	6.79742	0.0391644	4.46297	10.1594	6.6461	201.202	0.132894	5.95936	134.188	12.15	327.154	22.214	7165.68
100.nii.gz	-19.041	44.5701	4.67393e+08	4.35197	32.6003	3.24091	93.3392	12.6935	19.7111	12.8261	-91.8909	185.23	13.6393	313.685	-0.230595	3739146237	0.0575608	621.376	475.988	14980	-75.5048	65.6351	19.9021	0.515463	3.26302	3.15912	8.25122	0.375905	0.293233	0.98699	0.925482	-0.124051	0.723909	0.292803	21.5516	0.00612223	7.93512	0.0155622	5.01795	21.3843	6.97933	835.868	0.175972	3.6738	273.414	24.9375	510.486	14.1823	6881.22
101.nii.gz	-21.4207	24.3578	5.28834e+08	3.9148	24.3708	3.16476	60.1498	1.37758	14.486	1.43966	-64.6709	124.821	10.0731	301.931	-0.109485	4230670331	0.0780369	334.076	190.246	4823.44	-13.5709	38.1865	11.3852	0.529794	2.49829	2.78892	4.47086	0.425745	0.349283	0.984184	0.917639	-0.125331	0.673231	0.338026	13.5474	0.0101256	7.21451	0.0222492	4.64637	12.3929	6.91328	759.979	0.131008	5.34185	452.692	13.4656	203.417	24.1605	4978.27
102.nii.gz	-22.1082	43.668	3.36975e+08	4.30459	39.8456	2.21046	76.7952	10.4907	21.122	9.83627	-54.0736	130.869	16.0747	311.491	0.117493	2695796724	0.0553636	622.453	173.187	10419.4	72.3107	67.005	21.7085	0.490186	3.5351	3.04769	6.68496	0.363911	0.280983	0.972716	0.892374	-0.164713	0.754085	0.265206	12.7133	0.0065154	7.73696	0.015845	4.96647	22.1784	7.01321	555.181	0.159856	4.32484	192.278	24.9428	209.873	17.7411	2936.75
103.nii.gz	-11.8053	48.0793	1.0114e+08	4.29045	31.6202	2.9942	81.8651	17.2628	19.1922	16.1171	-57.6552	139.52	13.2323	318.185	0.0815802	8.09123e+08	0.0598326	585.947	258.638	15493.1	23.8047	73.3491	15.591	0.640357	2.9002	3.00201	6.50411	0.395204	0.314322	0.982851	0.914852	-0.215898	0.903701	0.313853	15.6243	0.00707216	7.56925	0.0189405	5.04554	22.235	6.76173	174.297	0.174472	3.32843	59.7728	23.665	278.353	13.5185	3578.63
104.nii.gz	-16.2293	36.5784	6.93693e+07	3.97437	26.5221	3.26775	69.3591	7.15282	16.2291	3.78029	-40.6264	109.986	11.0038	307.842	0.71302	5.54954e+08	0.0760026	423.932	108.951	5443.95	195.362	36.4441	15.4937	0.357838	3.0251	3.0013	5.69536	0.37212	0.283943	0.973329	0.891336	-0.159985	0.818477	0.285809	10.176	0.010781	6.96191	0.027541	4.39892	12.9845	6.19255	146.161	0.199674	2.59168	55.6339	17.0107	136.811	11.2186	1219.22
105.nii.gz	-10.7069	46.6997	4.13452e+07	4.16848	32.1943	2.77676	77.2549	17.5364	18.2674	18.4818	-42.7454	120	13.0645	318.334	-0.0017327	3.30762e+08	0.0644944	506.974	170.881	8742.46	-70.6832	57.6106	13.0589	0.631156	2.77381	2.86801	4.74061	0.393725	0.311002	0.980391	0.905988	-0.320503	0.959366	0.314479	12.6379	0.0117935	6.75588	0.0330633	4.71595	17.6674	6.18485	85.3186	0.209114	2.4178	26.3137	20.4436	189.635	10.0343	1753.18
106.nii.gz	-14.149	44.0273	1.09783e+08	4.1128	33.319	2.721	74.5007	10.431	18.9654	5.26225	-56.991	131.492	13.7629	311.281	0.519546	8.78262e+08	0.0691001	528.195	208.777	10489.2	335.319	59.9455	16.5316	0.557064	2.98584	3.08096	7.11884	0.391781	0.311109	0.979237	0.907285	-0.14078	0.797563	0.310542	14.0671	0.00926774	7.45351	0.0288647	4.79089	19.1193	6.72873	163.261	0.144096	5.01935	78.2904	21.2216	233.794	18.8199	3378.04
107.nii.gz	-10.1283	45.2468	6.64026e+07	4.01549	33.0937	2.42191	73.9709	15.7845	17.2242	15.869	-43.137	117.108	12.8878	316.472	-0.039199	5.3122e+08	0.0689334	434.843	146.849	5098.27	8.47274	45.7622	17.819	0.425094	3.26206	2.91955	5.26406	0.375271	0.293837	0.971458	0.888438	-0.216673	0.869653	0.281229	11.8183	0.0109069	6.95317	0.0291156	4.59482	15.8953	6.43718	106.822	0.161119	4.6847	45.7029	17.4401	177.465	17.3017	2694.85
108.nii.gz	-7.31041	32.5681	2.36884e+08	3.72869	17.951	4.5289	71.2812	12.0968	12.3524	12.3897	-68.2417	139.523	7.73582	312.544	-0.332504	1895070557	0.0967174	279.663	280.951	3493.68	-31.205	28.3238	10.2064	0.458403	2.30802	2.72354	4.32993	0.450174	0.37849	0.988483	0.930498	-0.128828	0.69238	0.350987	16.6254	0.0152426	6.7733	0.0397799	4.39243	9.63255	6.71534	298.94	0.123274	7.16746	234.54	11.2303	297.196	26.6256	7387.11
109.nii.gz	-19.3816	24.2933	101458306	3.77803	20.1215	3.1032	49.0142	1.71792	13.2563	1.50025	-52.9785	101.993	8.92663	302.195	-0.124253	8.11666e+08	0.0870009	287.906	145.318	3617.44	-3.78686	34.4887	10.0992	0.54646	2.3996	2.80407	4.18633	0.424553	0.346455	0.978843	0.903969	-0.120952	0.755205	0.34385	11.7991	0.0110561	7.04739	0.0290816	4.55182	11.147	6.61553	147.963	0.13318	5.46409	96.658	11.5062	151.751	21.6157	3257.82
11.nii.gz	-13.3008	34.1572	7.63415e+07	3.91245	27.3907	2.75315	65.3475	8.92157	15.3702	7.08955	-42.076	107.424	11.1538	309.493	0.248747	6.10732e+08	0.0764048	353.525	128.653	4696.72	86.7281	42.1547	11.1828	0.582614	2.57665	2.82391	4.18457	0.404172	0.322853	0.980198	0.905087	-0.162165	0.831615	0.333582	10.9952	0.00963953	7.11015	0.0253718	4.65404	13.3344	6.41996	133.033	0.166917	3.33039	60.8946	14.1843	141.701	14.3275	1790.29
110.nii.gz	-8.64262	18.8298	3.03977e+08	3.18198	13.9687	4.28941	42.656	4.45462	8.62852	3.84622	-55.3653	98.0214	5.84686	304.66	-0.104072	2431816842	0.132516	124.821	179.267	736.113	4.06988	13.974	3.98026	0.553719	1.39011	2.19327	1.97982	0.558077	0.510755	0.991435	0.941374	-0.133932	0.716613	0.442909	13.2953	0.0280783	5.7815	0.067193	3.91447	4.48857	6.81171	262.031	0.0800094	15.9259	433.991	5.06796	184.53	61.6565	10506.7
111.nii.gz	-19.7023	39.1827	5.02787e+08	4.24444	30.0155	3.25309	78.0949	8.74228	18.2517	7.54663	-86.3739	164.469	12.528	309.613	-0.111	4022295325	0.0628829	538.436	409.778	14220.5	-63.9361	64.6821	16.3719	0.594061	3.00704	3.12411	7.11136	0.384849	0.301404	0.986619	0.923244	-0.105648	0.744334	0.300683	19.9423	0.00630265	7.94413	0.0188287	5.02627	20.2635	7.0686	798.439	0.152229	5.33389	329.821	21.6103	431.555	18.9035	7560.97
112.nii.gz	-11.0088	26.5769	5.35363e+08	3.6469	18.025	4.11147	65.0527	6.46784	11.8357	5.05084	-65.5955	130.648	7.58405	306.873	0.29679	4282906456	0.101212	248.669	250.187	3052.3	62.097	27.0687	8.15173	0.534051	1.95638	2.6152	4.22554	0.491004	0.429355	0.990256	0.938674	-0.11613	0.722671	0.396074	15.667	0.0173697	6.68589	0.0513735	4.35965	8.80512	7.03356	524.346	0.0922332	12.3198	575.389	10.0242	259.536	43.438	10356.8
113.nii.gz	-4.71171	29.4193	1.39194e+08	3.50479	18.2793	3.67854	54.1982	11.3498	10.9117	11.0714	-49.653	103.851	7.44118	311.665	-0.266604	1113554666	0.105439	196.201	167.929	1609.4	-8.15613	21.6682	6.72571	0.523442	1.88	2.52867	3.06236	0.487947	0.423589	0.985722	0.922908	-0.125591	0.728273	0.391452	12.8137	0.0178257	6.4181	0.048248	4.22083	7.09849	6.62902	155.6	0.108583	10.5017	151.094	7.87604	171.316	35.2373	5821.66
114.nii.gz	-9.9482	36.1379	1.53757e+08	3.83816	25.0705	2.72754	62.7378	11.1547	14.389	9.66568	-48.5523	111.29	10.3851	311.657	0.200842	1230056360	0.0800023	312.888	161.94	3529.32	60.3545	35.5716	9.23359	0.585294	2.25315	2.72856	3.97229	0.444594	0.37154	0.983645	0.916222	-0.130814	0.761363	0.360741	12.4639	0.0111222	7.00365	0.0288552	4.56904	11.2013	6.82128	196.658	0.124231	7.09511	126.644	12.6294	174.673	25.8692	3833.19
115.nii.gz	-11.6682	36.9204	4.62593e+08	4.02781	23.1698	5.54997	94.3761	10.2897	15.4342	9.02543	-111.185	205.561	9.84662	310.992	-0.313201	3700746454	0.0783014	436.44	654.266	12619.5	-44.6983	48.5851	13.807	0.552316	2.60055	2.9626	6.84178	0.429443	0.355653	0.992522	0.944704	-0.117746	0.74957	0.342575	25.408	0.010526	7.40646	0.0303442	4.7586	15.598	7.0226	582.964	0.121883	8.42889	374.515	17.4749	670.976	27.2877	16939.7
116.nii.gz	-9.44993	26.5917	2.59112e+08	3.51238	19.1564	3.28955	64.2596	6.62644	11.2885	4.84492	-41.2989	105.559	7.84441	306.957	0.479547	2072899644	0.104528	202.935	116.221	1924.39	69.9263	23.7167	6.17713	0.584144	1.8336	2.48259	2.70314	0.485513	0.420296	0.98791	0.927261	-0.124519	0.728283	0.399178	10.575	0.0177233	6.43806	0.038253	4.24342	7.47346	6.6645	301.756	0.109729	7.81481	287.453	8.1915	125.28	32.1789	3361.96
117.nii.gz	-6.41373	34.8301	1.75953e+08	3.7457	23.7289	3.02421	60.4561	13.266	13.4087	12.1174	-55.7875	116.244	9.61373	313.7	0.124198	1407624604	0.0862248	272.19	226.551	3072.85	49.1034	32.031	8.33902	0.582454	2.13604	2.66243	3.58165	0.455257	0.383753	0.987336	0.925637	-0.128243	0.74418	0.368672	14.8532	0.0123627	6.88297	0.0345408	4.49372	10.0925	6.81015	207.928	0.116291	8.42175	154.17	10.9672	240.622	30.3669	6186.59
118.nii.gz	0.401288	35.3644	7.10763e+07	3.50704	18.4275	3.23449	54.807	17.664	11.0298	17.5701	-33.3384	88.1455	7.6455	317.969	-0.135922	5.68611e+08	0.102619	193.867	123.965	1298.6	2.87986	20.9919	8.80524	0.40798	2.24102	2.68661	3.62786	0.435113	0.358596	0.975366	0.896696	-0.107452	0.703666	0.359694	10.9961	0.0141836	6.57417	0.0343818	4.19059	7.44929	6.22366	99.7511	0.141893	4.46262	72.1408	7.83881	129.309	19.4438	2425.69
119.nii.gz	-14.651	22.4148	1.78247e+08	3.64836	17.1487	4.79884	52.0051	3.39814	11.7953	2.87873	-75.1918	127.197	7.3769	303.822	-0.0168198	1425972621	0.102269	257.483	298.768	4122.63	28.8198	28.9563	8.67596	0.535107	2.14069	2.68516	3.96614	0.45615	0.386151	0.988732	0.930598	-0.118185	0.730675	0.379274	17.1375	0.0156379	6.7268	0.045945	4.3605	9.40807	6.58478	245.264	0.127014	6.75989	197.482	10.3247	305.93	25.2931	7560.84
12.nii.gz	-29.5971	30.4906	6.3653e+07	4.229	32.5672	2.59788	66.09	1.3094	18.8825	1.47662	-53.0076	119.098	13.5962	302.199	0.038012	5.09224e+08	0.059828	536.889	140.99	13140.3	160.179	73.5747	22.5706	0.54098	3.66369	3.22013	7.85284	0.337022	0.247478	0.967691	0.881053	-0.188478	0.886694	0.257708	11.3228	0.00577914	7.74623	0.0142182	5.00667	24.0363	6.33728	161.743	0.232056	1.62425	41.7001	21.6684	160.11	8.75323	1274.71
120.nii.gz	-10.815	30.9989	2.06643e+08	3.80142	20.8315	4.53769	57.019	9.67196	13.2193	10.3944	-71.7273	128.746	8.63331	310.165	-0.564246	1653145790	0.0883031	305.893	314.365	5650.64	-94.9026	36.571	10.238	0.562174	2.30288	2.77856	4.75635	0.443164	0.369932	0.986897	0.92614	-0.126774	0.75964	0.360048	17.5435	0.0117741	7.04655	0.0322562	4.58297	11.7022	6.75504	272.52	0.126872	6.22454	189.675	12.3231	316.588	24.4655	7715.17
121.nii.gz	-18.6023	20.9533	1.22028e+08	3.77851	18.8832	5.10467	71.7429	1.60844	12.7842	2.12011	-84.1633	155.906	8.05749	302.109	-0.136494	9.76224e+08	0.0931908	302.312	319.405	5439.21	-38.3589	32.0158	11.0323	0.482732	2.33219	2.8	5.41594	0.448048	0.377889	0.989837	0.936028	-0.130859	0.763398	0.369184	17.7245	0.0144186	6.85698	0.0411145	4.42245	10.762	6.75488	158.073	0.118229	7.99664	124.596	12.261	329.911	28.0352	9175.55
122.nii.gz	-10.8345	33.9635	3.58084e+08	3.97687	21.5686	6.71529	80.0387	10.7072	14.7704	11.281	-115.145	195.183	9.19128	311.389	-0.910105	2864672505	0.0819577	423.979	723.935	13720.6	-229.885	42.5172	15.4256	0.459469	2.75979	3.01777	7.51666	0.412319	0.33444	0.991323	0.940337	-0.0992997	0.69479	0.328145	26.7799	0.0103673	7.34111	0.0280093	4.61946	14.4857	6.89674	482.24	0.130582	6.73232	302.67	17.1682	727.298	23.391	16730.8
123.nii.gz	-11.3695	16.9135	4660054851	3.30234	13.8783	5.57153	65.3959	2.31282	9.12872	2.00245	-89.6185	155.014	5.83821	302.566	-0.136553	37280438806	0.128933	152.908	361.435	1624.18	-2.97454	17.6247	5.24189	0.538765	1.62318	2.35072	2.50438	0.518775	0.462185	0.995041	0.953741	-0.10685	0.653966	0.425167	18.9299	0.0239571	6.15448	0.0567808	4.06209	5.71666	6.84965	4395.25	0.086344	12.0486	6563.19	6.18927	365.8	54.6077	19547.6
124.nii.gz	-12.5623	29.7437	3.54315e+08	3.79572	20.6564	3.62769	68.686	7.8178	13.1395	6.9053	-69.6426	138.329	8.75224	308.288	0.155625	2834519257	0.0875586	289.754	255.366	3265.78	36.0294	29.8148	10.8506	0.46417	2.46539	2.85008	4.62099	0.418934	0.339925	0.986903	0.92341	-0.0796813	0.634887	0.341174	15.831	0.0111876	7.09741	0.0278811	4.46415	10.1663	6.62956	523.273	0.140363	5.12168	326.418	11.6501	269.568	20.3627	5118.94
125.nii.gz	-10.5544	41.2757	4.07077e+08	4.06398	28.015	3.03347	82.1141	13.7069	16.3424	12.1983	-59.6656	141.78	11.5038	314.371	0.127026	3256617443	0.0701426	417.082	236.234	7320.6	90.6567	49.5742	13.1254	0.579517	2.725	2.97634	5.52694	0.397697	0.31562	0.985291	0.918855	-0.103852	0.729102	0.323708	15.0702	0.00744182	7.60729	0.0176806	4.82757	15.6749	6.79448	629.966	0.152941	3.96328	288.917	16.7386	249.155	16.9558	3869.52
126.nii.gz	-14.1311	34.0739	7.45397e+08	3.96059	24.1338	3.41134	72.2752	8.10771	14.8835	7.1185	-73.8545	146.13	10.1242	308.699	-0.0559951	5963174853	0.0772664	364.555	298.141	6292.83	11.7279	43.0471	10.1962	0.614605	2.35565	2.80439	4.47783	0.434376	0.359182	0.989199	0.930978	-0.117137	0.743223	0.352922	17.0272	0.00993825	7.316	0.0261119	4.72992	13.3108	7.03042	960.806	0.122834	6.92687	604.378	14.6525	307.722	26.0527	7448.25
127.nii.gz	-11.2643	40.4165	3.36371e+08	4.04114	28.4214	2.88103	84.285	14.3639	16.1505	13.9607	-61.1619	145.447	11.5718	314.999	0.0384273	2690965734	0.0695269	399.713	273.199	6602.14	24.2063	49.2513	12.46	0.594733	2.68731	2.95199	5.07774	0.398854	0.315753	0.986814	0.921973	-0.109694	0.745505	0.317202	16.2478	0.00696135	7.57506	0.0150317	4.83277	15.4278	6.83561	506.074	0.149284	4.27506	235.696	16.1136	283.981	17.7758	4579.25
128.nii.gz	-18.9939	38.1869	6.75606e+08	4.20796	28.5366	3.41134	81.1281	8.25704	17.6393	7.57377	-91.5182	172.646	12.0064	309.083	-0.0329092	5404846097	0.0645607	510.086	451.151	13922.8	-30.0121	62.3147	15.5778	0.598361	2.94516	3.08041	6.65354	0.384952	0.300616	0.988553	0.928243	-0.105651	0.736924	0.303645	20.9633	0.00621108	7.90223	0.0157466	5.00379	19.4731	6.99652	1092.28	0.154451	3.96196	456.574	20.4542	467.987	16.8597	7622.59
129.nii.gz	-13.2037	17.1829	109565079	3.36897	14.6174	4.66187	60.3175	1.74997	9.80434	1.0888	-37.9104	98.2279	6.22412	302.04	0.686943	8.76521e+08	0.122958	175.165	78.6289	1554.55	53.7089	17.8532	6.15046	0.481061	1.78449	2.46257	2.86359	0.49746	0.436257	0.986943	0.926424	-0.116405	0.693959	0.410592	8.70062	0.0231469	6.12684	0.0661368	4.02888	6.00092	6.54497	115.819	0.0964357	11.6785	147.673	7.06073	85.5329	41.741	3278.2
13.nii.gz	-14.8545	21.2049	1.63341e+07	3.5481	18.3943	3.42953	40.8822	4.29114	11.3893	5.28488	-38.5123	79.3945	7.60376	304.643	-0.347352	1.30673e+08	0.102014	214.314	87.2224	1996.71	7.69421	26.6244	12.2693	0.389484	2.74757	2.69337	3.93095	0.387592	0.301249	0.962032	0.87062	-0.415008	0.965409	0.303356	9.14045	0.0250036	5.62431	0.0599128	3.88424	9.72343	5.44226	39.3636	0.223657	1.85589	17.9545	8.71333	95.9659	9.67045	921.318
130.nii.gz	-22.0976	29.0831	1.60321e+08	4.0415	24.271	3.48697	67.6317	1.5315	15.8657	0.388673	-71.222	138.854	10.338	302.243	0.0821733	1282565769	0.0746724	429.59	257.051	8776.39	70.7925	47.456	13.4653	0.549133	2.77407	2.96177	5.38832	0.395555	0.312569	0.984895	0.917505	-0.12342	0.750146	0.312111	15.7654	0.00894046	7.40514	0.0206104	4.73629	15.2303	6.78491	252.91	0.144108	4.51897	131.05	17.2344	267.126	18.959	4819.77
131.nii.gz	-12.0595	34.7482	6.7502e+08	3.8549	23.8246	3.09263	74.2705	8.59566	14.3546	5.92725	-52.2116	126.482	9.96122	309.124	0.392497	5400159801	0.0832198	326.47	176.891	5161.86	126.606	40.2504	8.01455	0.665673	2.07113	2.65694	3.61325	0.463656	0.394199	0.988737	0.930228	-0.135454	0.779353	0.3767	12.9933	0.0120485	7.06709	0.033645	4.64774	12.0662	7.11019	756.533	0.107097	8.92249	587.864	13.1245	187.956	34.5951	5590.9
132.nii.gz	-7.56314	35.7885	433955214	3.83913	22.0841	3.94621	79.3168	13.1623	13.6591	12.5812	-73.9094	153.226	9.28267	313.656	-0.108652	3471641712	0.0837726	309.592	335.358	4489.73	5.27583	34.1475	10.9854	0.510164	2.45374	2.85795	4.81253	0.424207	0.346734	0.989109	0.930427	-0.090596	0.672559	0.343195	18.1538	0.0102501	7.18861	0.0252458	4.55565	11.2832	6.79558	574.415	0.130223	5.70929	369.521	12.4697	341.245	22.728	7664.23
133.nii.gz	-26.921	30.5916	6.11018e+08	4.21592	31.6698	2.81813	76.0233	2.21248	18.2321	2.6654	-78.5598	154.583	13.0104	303.053	-0.0787449	4888141385	0.0618085	508.542	288.82	10207.5	-17.0884	60.6607	19.3484	0.515667	3.39736	3.23924	7.50933	0.347886	0.257053	0.982266	0.909231	-0.0753901	0.651476	0.262992	16.688	0.00494776	8.08475	0.0109153	4.99381	20.0023	6.79047	1197.46	0.179987	2.87654	411.212	20.4171	307.244	13.2414	3968.61
134.nii.gz	-16.1711	28.341	1.88953e+08	3.85794	22.5319	3.27368	63.639	5.93965	13.8724	5.983	-55.1716	118.811	9.46059	306.453	0.00544666	1511626172	0.0823434	314.09	186.956	4625.1	5.01657	36.4677	11.8099	0.507894	2.57996	2.88719	4.87145	0.411338	0.330621	0.982369	0.912073	-0.104356	0.700789	0.326303	13.4455	0.00961106	7.25024	0.024014	4.60454	12.0694	6.71923	277.431	0.137888	4.93763	165.675	12.5665	199.856	21.7346	4202.65
135.nii.gz	-15.4739	21.2343	4.97669e+08	3.6298	17.0588	4.49234	68.2124	1.84191	11.5275	0.766201	-71.2065	139.419	7.29965	302.24	0.339834	3981350739	0.103336	240.366	250.481	3299.85	42.3322	26.7233	7.73561	0.54722	1.98208	2.60742	3.65118	0.481756	0.417608	0.9912	0.939422	-0.112502	0.695709	0.390129	15.6758	0.0173733	6.68356	0.0457612	4.34951	8.61473	6.94887	542.314	0.0995437	10.8929	562.974	9.6936	261.435	38.6446	9562.13
136.nii.gz	-23.0467	10.5336	6.21312e+07	3.50975	17.94	3.90304	35.4029	-6.16362	10.7892	-5.9915	-64.237	99.6399	7.30928	294.166	-0.332594	497049791	0.105574	193.922	154.565	1869.11	-25.425	21.4959	7.31031	0.487881	2.06509	2.57503	2.93448	0.447278	0.372167	0.984423	0.91526	-0.125698	0.746247	0.373267	12.2883	0.0155873	6.43597	0.0329935	4.18409	7.20155	6.21086	101.248	0.141014	4.08567	75.8022	7.9484	158.609	18.9694	2883.01
137.nii.gz	-9.84624	23.9143	5.93685e+08	3.50347	16.7789	3.96074	63.4342	6.51943	10.6063	6.00949	-60.302	123.736	7.02867	306.832	0.22228	4749479411	0.108275	191.876	220.276	1684.25	39.4867	20.9326	6.80072	0.506612	1.91585	2.5409	3.02577	0.475451	0.408459	0.99039	0.934803	-0.0925567	0.645583	0.39562	14.7221	0.0169304	6.51914	0.0364183	4.20362	6.93333	6.63633	721.536	0.114421	7.07471	682.784	7.79964	226.967	28.5604	6127.21
138.nii.gz	-22.1856	37.077	8.39154e+08	4.25611	31.4178	3.01862	94.4228	7.23557	18.4585	6.97591	-92.7348	187.158	12.985	308.102	0.0451353	6713229356	0.060846	533.191	440.237	12388.7	82.0003	64.6008	18.764	0.548476	3.28969	3.21126	7.63543	0.358401	0.269809	0.987641	0.924282	-0.0860361	0.685883	0.275941	20.7068	0.00502391	8.10311	0.0116099	5.03921	20.8412	6.89888	1541.93	0.174426	3.17032	537.879	21.461	460.207	13.7962	6089.35
139.nii.gz	-15.9626	32.6242	122003213	3.89994	25.2817	2.81057	66.0599	6.13485	14.9516	3.9485	-45.1521	111.212	10.5131	306.701	0.368047	9.76026e+08	0.0782358	347.157	137.429	4437.58	108.543	39.0288	10.7685	0.562271	2.47789	2.83259	4.44504	0.415045	0.334707	0.982549	0.911889	-0.125125	0.759419	0.337505	11.4172	0.00989376	7.16356	0.025893	4.61318	12.4493	6.61454	188.727	0.14551	4.88695	101.472	13.8776	151.329	19.1773	2390.18
14.nii.gz	-13.6548	33.2401	1.31179e+08	3.94256	22.948	3.95783	71.5278	8.74522	14.4886	8.75309	-81.422	152.95	9.5944	309.324	-0.127727	1049435579	0.0793604	357.968	370.401	5414.48	-23.606	36.7225	13.4872	0.450225	2.73747	2.9576	5.60069	0.406824	0.327923	0.987461	0.925439	-0.12286	0.748206	0.322655	19.0937	0.00984267	7.19339	0.0252484	4.5686	12.5524	6.61834	207.604	0.151425	4.70315	108.803	14.4028	384.916	17.3676	6410.68
140.nii.gz	-18.2281	34.5356	5.03506e+08	4.12054	25.4903	4.3578	99.9085	8.3751	16.3628	9.35393	-106.046	205.955	10.7496	309.128	-0.414973	4028048490	0.0710686	464.878	594.043	12083.5	-132.92	53.7792	15.8205	0.544053	2.89476	3.083	7.25668	0.394295	0.312482	0.991432	0.938663	-0.0988707	0.722862	0.312835	24.1775	0.00757332	7.73146	0.0209503	4.87728	17.3999	6.94006	770.189	0.146174	4.94606	374.46	18.6596	603.126	18.7567	11338.3
141.nii.gz	-12.0292	26.6925	1.35798e+08	3.62435	18.4796	5.02161	50.8749	7.0222	11.7376	7.29487	-88.3418	139.217	7.82911	307.411	-0.644831	1086386163	0.0985908	238.599	401.477	2935.04	-53.4403	26.9729	10.589	0.436546	2.3173	2.79488	5.05886	0.446103	0.3739	0.988251	0.930385	-0.109374	0.718996	0.358352	19.9342	0.0134937	6.8263	0.0404985	4.36538	9.39048	6.50607	191.555	0.133302	6.90718	141.675	9.64114	405.892	23.9882	9798.79
142.nii.gz	-6.48406	53.8099	3.6336e+08	4.27905	31.1212	3.26512	105.411	23.6664	18.794	23.8368	-74.1103	179.522	13.1057	324.533	-0.254041	2906882849	0.0602813	561.905	414.464	13403.3	-82.0189	66.1532	20.1538	0.532336	3.40732	3.26068	8.24348	0.352326	0.262825	0.986059	0.920091	-0.0950225	0.721444	0.266795	20.0735	0.00511636	8.09323	0.013862	5.04631	21.5767	6.83681	615.217	0.178324	3.20926	207.97	22.5903	431.919	12.778	5339.25
143.nii.gz	-16.2298	33.0379	2.47867e+08	3.99671	24.8259	3.25159	66.0148	7.43175	15.286	7.02178	-62.1436	128.158	10.3929	308.051	-0.131886	1982937013	0.074666	381.252	227.931	7310.82	-13.6114	47.4443	12.9272	0.570468	2.72643	2.95625	5.23434	0.397245	0.314118	0.983348	0.913486	-0.111417	0.735093	0.315002	14.8086	0.0080851	7.5158	0.0211308	4.79699	15.0929	6.82676	372.795	0.142724	4.8598	195.028	15.3769	239.929	19.8591	4691.19
144.nii.gz	-11.6227	33.8274	6.09852e+08	3.84925	21.1268	4.30738	62.6827	9.61594	13.7292	8.48371	-87.0477	149.73	9.01646	310.147	-0.317483	4878816876	0.0866417	329.153	417.037	7106.11	-81.3941	39.6234	9.29753	0.618266	2.20105	2.73564	4.31082	0.454206	0.384044	0.990774	0.937145	-0.124561	0.754586	0.371962	20.2349	0.0129385	7.09482	0.0401319	4.63572	12.2302	7.03536	692.065	0.109159	9.35725	549.308	13.197	430.355	33.3549	13518.3
145.nii.gz	-19.0022	33.4221	4.51417e+08	4.07948	26.6278	3.90125	68.3267	8.09266	16.2962	8.88353	-110.535	178.862	11.1599	308.798	-0.486383	3611335734	0.0702207	435.266	634.525	9210.87	-148.875	48.7607	17.2922	0.475746	3.18028	3.14779	6.86531	0.361326	0.271913	0.98796	0.924636	-0.0762619	0.638153	0.278343	25.0331	0.00646279	7.77089	0.0146798	4.81316	16.5132	6.66236	829.03	0.175123	3.0025	332.425	17.4753	648.489	13.5437	9013.95
146.nii.gz	-13.9093	25.1676	8.4398e+08	3.71651	19.4665	4.36704	70.1041	5.34205	12.2855	5.4064	-88.7128	158.817	8.10642	305.77	-0.23597	6751838187	0.0938873	261.275	386.764	3334.79	-6.22949	29.2041	8.73035	0.537299	2.15425	2.69269	3.99357	0.449956	0.377517	0.992317	0.941551	-0.0960572	0.683283	0.374636	19.5357	0.0128871	6.93351	0.0297025	4.4583	9.48361	6.7867	1075.21	0.11911	6.02293	847.521	10.5421	393.491	26.5988	10327.3
147.nii.gz	-12.1513	23.0538	5.91589e+08	3.54018	17.7904	3.76877	59.5251	4.80141	11.0044	4.09362	-76.463	135.988	7.44694	305.131	0.0441891	4732710920	0.103531	201.051	305.653	1938.22	21.2885	23.3459	6.83776	0.545172	1.94833	2.55582	2.94283	0.469306	0.400127	0.99159	0.937894	-0.097467	0.667435	0.386991	17.3644	0.0152618	6.63562	0.0345749	4.29671	7.54591	6.77352	689.863	0.108571	8.0069	657.838	8.11396	312.95	34.1851	10218.3
148.nii.gz	-10.1818	41.4795	2.44525e+08	4.0834	27.6146	3.69146	77.9793	15.043	16.4495	14.7232	-104.145	182.125	11.476	315.728	-0.223301	1956196261	0.0689122	431.768	609.92	6578.47	8.79596	46.559	16.6963	0.471581	3.04568	3.11442	7.13273	0.377342	0.291589	0.988445	0.927839	-0.0962919	0.710563	0.294956	24.5448	0.00684122	7.65324	0.0170318	4.78531	15.8138	6.6384	427.054	0.174095	3.47775	169.042	17.3547	617.874	13.3645	8358.42
149.nii.gz	-13.2687	36.7868	2.37409e+08	3.95219	27.8131	2.80504	69.1294	10.1258	15.6489	8.29775	-73.4255	142.555	11.3473	310.72	0.211124	1899273194	0.0735294	368.999	312.569	4965.01	93.0527	43.7137	13.1301	0.536322	2.76767	2.95719	5.2109	0.389115	0.30355	0.985285	0.917425	-0.101552	0.708983	0.308102	17.4619	0.00769687	7.43752	0.017965	4.70371	14.211	6.64799	382.63	0.155604	3.61555	180.809	14.8074	321.891	16.9845	5009.84
15.nii.gz	-29.9137	33.5793	3.17475e+07	4.02576	39.6831	1.97713	48.3066	-3.55696	20.3965	-10.9071	-47.7737	96.0803	16.0878	297.377	0.439477	2.5398e+08	0.0690172	554.798	80.1257	5722.16	179.001	43.8721	7.72125	0.583581	2.10879	2.46698	2.8712	0.442924	0.369167	0.982045	0.910144	-0.311572	0.93926	0.38546	8.37326	0.0187111	6.11499	0.0445255	4.30858	12.8983	6.23422	68.9331	0.192014	2.88191	24.7772	22.2199	118.304	12.6323	1178.26
150.nii.gz	-7.24465	38.0692	7.02748e+08	3.88783	22.4168	3.64363	77.0783	14.7132	13.9936	14.7813	-69.3726	146.451	9.43243	315.231	-0.186314	5621980633	0.0814724	326.045	311.866	4723.34	-8.25933	37.0908	11.6837	0.519308	2.50248	2.89406	5.2664	0.423639	0.346346	0.987741	0.92731	-0.0900593	0.675337	0.33955	17.4787	0.00966178	7.32214	0.0240058	4.63508	12.1936	6.86887	923.734	0.130619	5.94533	576.173	13.1235	317.219	22.7192	7084.39
151.nii.gz	-8.31974	37.3745	1.8501e+08	3.87546	25.2286	3.0678	60.8712	14.9516	14.5552	16.3047	-61.9147	122.786	10.3711	315.47	-0.342723	1480080017	0.0781529	326.754	278.773	4223.41	-48.4643	37.8983	11.6123	0.529994	2.54727	2.89576	4.94967	0.415332	0.336533	0.983899	0.916013	-0.10634	0.726689	0.336356	16.4981	0.00873848	7.26464	0.0225363	4.62949	12.3777	6.59326	292.168	0.157164	4.17883	145.286	13.1213	285.043	17.1334	4902.51
152.nii.gz	-8.98796	33.2198	5.61196e+08	3.79265	21.1313	3.97148	99.4104	12.6856	13.1215	13.4341	-77.3926	176.803	8.83997	313.145	-0.232139	4489570588	0.0874782	287.513	366.025	4126.52	-43.2756	33.0649	10.7538	0.508318	2.45444	2.84607	4.56962	0.421152	0.342743	0.991975	0.938967	-0.0845908	0.64978	0.341742	18.9853	0.0103375	7.1877	0.0244466	4.54318	10.9547	6.78693	746.304	0.130404	5.55709	500.638	11.5959	373.998	22.9899	8639.84
16.nii.gz	-14.8367	27.399	5.386e+07	3.72449	24.2281	3.03965	52.2549	3.18232	14.1095	-1.45954	-51.7175	103.972	9.92365	303.687	0.325943	4.3088e+08	0.0958259	306.45	153.838	3592.65	65.3884	35.7572	11.5439	0.506516	2.53558	2.83408	4.61944	0.430994	0.355244	0.977882	0.903739	-0.188291	0.851244	0.3197	12.1561	0.015787	6.67038	0.0503376	4.4566	11.8253	6.31143	81.5479	0.139637	6.66024	55.9623	12.4903	159.755	21.6096	2818.06
17.nii.gz	-5.72918	29.4979	1.92935e+07	3.33507	15.8045	2.64816	43.5167	11.9052	10.043	12.3223	-19.1551	62.6717	6.99394	312.157	0.0908149	154347679	0.11356	156.882	47.1654	701.336	13.7272	14.9256	8.65664	0.273438	2.29375	2.59046	3.01937	0.427463	0.347656	0.955237	0.861531	-0.196883	0.845943	0.338285	6.75128	0.020419	5.8939	0.0455992	3.7964	5.89556	5.54917	34.0808	0.172125	3.01643	22.4848	6.39414	53.4343	14.2626	697.848
18.nii.gz	-3.03422	38.569	1.40587e+08	3.76925	21.5011	3.41677	62.7153	17.4726	13.0796	17.1696	-50.696	113.411	8.9043	317.914	-0.2551	1124699926	0.087548	280.541	223.818	2537.54	-23.2379	25.66	9.9502	0.409655	2.28464	2.69287	4.24545	0.44598	0.373665	0.98402	0.918672	-0.13558	0.710414	0.361117	14.828	0.0144519	6.67943	0.0376714	4.30792	8.90255	6.57267	190.142	0.136694	5.77921	121.779	11.2853	236.027	21.8541	5078.36
19.nii.gz	-17.1934	34.1415	3.09972e+08	4.06923	26.0619	3.88075	71.3865	6.61173	16.2563	5.4178	-85.804	157.191	11.1238	307.321	-0.267333	2479775885	0.0721872	435.314	388.944	10106.6	-68.1916	48.6783	13.5296	0.552792	2.5799	2.88582	6.28239	0.430732	0.357553	0.988397	0.93196	-0.149232	0.774231	0.346578	19.497	0.00995461	7.33902	0.0303938	4.7661	15.552	6.96	447.865	0.136461	6.03116	236.918	17.5341	410.654	23.0512	9059.82
2.nii.gz	-16.3853	19.3711	6.08031e+07	3.54043	18.0814	3.40893	44.4411	0.678356	11.2725	-0.293249	-48.7511	93.1922	7.59603	301.024	-0.00207501	4.86425e+08	0.104266	208.247	111.616	1428.25	10.8421	19.4898	9.62569	0.329073	2.27979	2.71239	4.10824	0.443124	0.368661	0.976013	0.900639	-0.139306	0.762034	0.351559	10.4461	0.0179421	6.36858	0.0456407	4.07035	7.27887	6.22788	98.1684	0.146302	5.54094	69.9627	8.3809	121.703	20.2221	2330.55
20.nii.gz	4.449	50.625	3.48689e+07	3.80079	21.4529	3.02221	65.1385	27.0661	14.0323	28.0427	-24.4504	89.5889	9.47927	327.55	-0.254974	2.78951e+08	0.085387	316.687	119.079	3022.41	-52.2361	30.9203	15.5331	0.332218	3.02873	2.95261	5.45988	0.382673	0.300165	0.96179	0.873019	-0.25324	0.91391	0.297119	10.7219	0.0147878	6.46226	0.0407668	4.26383	11.6133	5.91932	64.36	0.198031	2.81045	27.7508	12.6684	131.646	10.6677	1454.04
21.nii.gz	-11.811	38.3859	3.99963e+08	4.08512	26.6004	4.26937	76.2622	13.2168	16.4601	14.6814	-75.6701	151.932	11.0634	313.945	-0.63964	3199704900	0.0710032	456.901	371.392	8471.34	-134.618	44.0048	18.8137	0.376825	3.00972	3.03809	8.58877	0.405127	0.328353	0.983278	0.920377	-0.124315	0.668635	0.319232	19.1073	0.00898253	7.42394	0.0204343	4.70155	15.7046	6.91009	593.341	0.146215	4.82498	288.131	18.3359	384.788	19.4032	7466.5
22.nii.gz	-8.24274	15.6694	2.31758e+07	2.98416	14.4627	3.76898	25.9997	3.10342	7.90077	2.92473	-39.2763	65.2759	5.66589	303.261	-0.333135	1.85406e+08	0.144054	95.7507	84.983	386.688	-2.47604	10.9564	5.5814	0.340586	1.86919	2.23294	1.78654	0.454765	0.382225	0.973728	0.889065	-0.211468	0.841985	0.410392	9.14475	0.0294775	5.37844	0.0557922	3.58592	4.13445	5.34507	44.5714	0.176871	2.54649	36.3016	3.97888	87.3532	14.3016	1283.81
23.nii.gz	-8.99633	23.8568	3.45304e+08	3.46531	13.6961	6.37952	81.0778	4.9687	10.8875	2.2233	-63.6895	144.767	6.21337	305.368	0.849277	2762435314	0.127911	244.001	207.068	3150.98	84.6112	20.3676	4.98608	0.535711	1.53213	2.26988	2.44355	0.542584	0.490826	0.99466	0.953709	-0.159432	0.705413	0.421457	14.2546	0.0336046	5.81318	0.0822693	3.96922	6.33842	6.88542	316.399	0.0854439	15.354	473.656	9.82436	219.883	52.6322	10305
24.nii.gz	-19.2694	31.0207	5.33642e+08	4.02233	24.7776	3.65045	88.7865	3.73331	15.6288	1.54194	-71.0149	159.801	10.4397	304.405	0.444563	4269136821	0.0754042	408.364	265.732	6505.25	143.767	40.7833	11.7897	0.526809	2.44992	2.81619	5.24303	0.437842	0.364509	0.989738	0.93477	-0.129053	0.697907	0.347121	16.0773	0.011371	7.20053	0.0283928	4.63414	13.1433	7.05576	707.786	0.122901	7.10589	434.253	16.3953	280.533	26.4558	6745.62
25.nii.gz	-6.94932	34.6104	6.65091e+08	3.77226	23.4947	3.40608	66.9623	11.9801	13.5902	10.8022	-59.4021	126.364	9.60972	312.443	-0.177784	5320724665	0.0864953	289.231	222.291	3279.11	8.42701	30.6379	8.52771	0.542537	2.07185	2.57469	3.69858	0.47581	0.409831	0.988123	0.930691	-0.149074	0.695553	0.37533	14.7225	0.014735	6.72898	0.0351856	4.44221	9.79141	7.09093	713.277	0.104694	9.16951	589.293	11.6275	233.512	35.3065	7746.44
26.nii.gz	-12.3544	33.7921	2.46835e+08	3.86791	26.1749	2.79754	69.0945	9.01933	14.8487	7.00532	-54.2029	123.297	10.7833	309.55	0.279843	1974683462	0.0788007	328.259	179.547	3816.23	76.4214	36.4744	8.54551	0.611206	2.1273	2.60848	3.59427	0.46254	0.39312	0.987135	0.926158	-0.175256	0.806776	0.368582	13.1357	0.0130777	6.80611	0.0396235	4.56014	11.255	6.75252	361.25	0.140237	6.3933	202.991	13.2045	190.303	23.2811	3666.35
27.nii.gz	-11.5789	43.3262	7.36254e+08	4.13887	27.2045	3.42594	90.4961	12.9469	17.0862	10.3223	-70.2308	160.727	11.5664	313.714	0.181093	5890032607	0.0698726	480.78	336.759	9711.72	115.735	49.7108	16.6965	0.476027	2.84701	2.94701	7.33412	0.419488	0.345381	0.986591	0.927914	-0.147354	0.704237	0.325787	18.1247	0.0100903	7.42296	0.0291994	4.76436	16.6018	7.10467	1017.94	0.13607	5.85011	522.717	19.3548	346.573	22.7709	7353.1
28.nii.gz	-7.72806	14.5119	4.43416e+07	2.84224	10.9627	3.54537	35.2251	3.81077	6.86813	3.7051	-19.4952	54.7204	4.66715	303.938	0.236405	3.54733e+08	0.166363	77.353	26.502	187.191	6.93575	6.92024	2.74366	0.394996	1.24515	1.96693	1.12876	0.564096	0.51861	0.982039	0.911814	-0.168125	0.751792	0.469273	5.04445	0.0452419	4.86907	0.0878158	3.28852	2.41597	5.60103	59.5542	0.124071	5.87498	79.8542	3.13854	30.7229	27.3042	842.473
29.nii.gz	-6.23241	39.0617	2.12475e+08	3.76528	23.8617	2.70644	62.5533	13.298	14.0561	10.1777	-40.6457	103.199	9.9786	313.782	0.385721	1699800685	0.087789	303.602	147.664	3761.38	119.928	36.9212	7.84373	0.643525	2.09632	2.55107	3.02258	0.457221	0.385672	0.984704	0.918025	-0.189324	0.833051	0.369076	11.8469	0.014751	6.68076	0.0448763	4.50154	11.1912	6.45339	345.267	0.159994	4.11143	189.449	12.2613	160.124	17.0621	2432.42
3.nii.gz	-35.658	46.9264	5.61319e+07	4.62361	44.0732	2.65451	78.0217	8.42547	25.6946	10.4249	-78.5158	156.538	18.4927	310.026	-0.312338	4.49055e+08	0.0459279	989.944	351.286	27355.9	-250.63	100.429	64.6308	0.24294	6.3996	3.61094	15.1779	0.246134	0.159215	0.945619	0.845974	-0.342451	0.977912	0.157547	18.499	0.00592507	7.63033	0.0151464	5.10815	41.265	6.37565	162.408	0.278095	1.1571	26.8219	39.7218	370.974	5.97603	2176.88
30.nii.gz	-21.8022	29.5329	295042832	4.08124	26.0662	3.61286	68.7515	3.1186	16.1712	2.70399	-80.7121	149.464	10.8858	303.836	0.10551	2360342656	0.0713372	435.392	350.226	8650.53	102.378	48.1698	12.6517	0.568852	2.62723	2.85248	5.03588	0.415931	0.337747	0.987538	0.926165	-0.151713	0.769891	0.326441	18.4745	0.0092194	7.33326	0.0245005	4.76742	15.2054	6.89904	469.511	0.146906	4.66941	227.994	17.4396	345.768	19.0932	6582.62
31.nii.gz	-5.20336	34.1289	2.03498e+07	3.5513	20.0839	3.22002	52.8321	17.8071	12.1897	20.3638	-29.4931	82.3252	8.27066	318.186	-0.554931	1.62798e+08	0.103438	241.28	107.382	3607.92	-125.39	32.4976	3.32745	0.811023	1.38676	2.05802	1.32676	0.532473	0.480915	0.988933	0.928196	-0.320721	0.940857	0.473099	10.0044	0.0235945	5.84783	0.0568996	4.3204	8.95626	5.3952	48.0348	0.238979	1.49986	20.791	9.76496	110.463	8.06468	927.06
32.nii.gz	-18.8273	24.3286	169418108	3.85151	24.1359	4.40192	48.7276	2.97503	14.1762	4.04899	-84.0047	132.732	9.81441	303.521	-0.691723	1355344864	0.082075	331.261	341.023	3198.11	-39.7906	28.104	13.4488	0.310831	2.66074	2.87508	5.60591	0.418453	0.341406	0.982946	0.916212	-0.121358	0.663916	0.327811	18.3671	0.0115444	6.9295	0.0224099	4.36811	10.3882	6.64923	260.258	0.141522	4.76809	150.936	13.3024	340.324	19.6612	6936.16
33.nii.gz	11.121	64.2343	4.276e+07	3.91798	20.606	4.60783	80.038	42.0569	15.973	46.2429	-38.1762	118.214	9.64421	342.742	-1.20157	3.4208e+08	0.0856781	469.506	278.797	8589.74	-302.884	40.4637	18.188	0.381254	3.20522	2.92921	6.18652	0.364926	0.277011	0.973759	0.894275	-0.294582	0.93604	0.28429	16.5119	0.0172949	6.25219	0.0431607	4.24788	14.6629	5.83051	80.0165	0.219826	2.00501	31.1868	18.6912	303.967	8.73077	2908.89
34.nii.gz	-6.25082	45.2627	1.61017e+08	3.97872	28.0603	2.84085	81.7664	17.6161	16.0578	15.3022	-27.7894	109.556	11.5613	318.227	0.450525	1288137034	0.0727582	388.661	97.8405	5887.19	156.401	43.1616	10.9391	0.587501	2.59262	2.8076	3.8254	0.3987	0.313479	0.980536	0.904148	-0.141607	0.78473	0.312617	9.47232	0.00920068	7.19222	0.0226162	4.66153	13.5252	6.45698	278.516	0.175167	3.37901	115.686	15.6335	116.301	14.4566	1231.17
35.nii.gz	-12.2984	38.5139	1.76145e+08	3.9922	26.3899	3.07741	75.0845	11.067	15.7609	8.28958	-45.1767	120.261	10.8706	311.699	0.444857	1409158547	0.0744494	393.866	158.983	4632.19	77.9131	36.7904	13.1495	0.430432	2.72557	2.86135	4.84971	0.405686	0.324966	0.981811	0.910906	-0.137593	0.713041	0.312931	12.3711	0.0104578	7.11176	0.0283397	4.56267	12.485	6.73639	267.106	0.147328	4.85586	134.977	15.7839	177.493	18.9857	2955.18
36.nii.gz	-23.9775	37.277	3.53883e+08	4.25609	31.7726	2.92223	69.3954	6.30069	18.721	7.11886	-80.3111	149.707	13.1735	307.195	-0.0616403	2831064311	0.0604291	548.696	343.366	12804.3	-10.7914	64.4526	21.1472	0.50289	3.49757	3.13553	7.20346	0.359613	0.275986	0.979416	0.904913	-0.131432	0.715971	0.275968	18.2331	0.00597892	7.91378	0.0148988	5.00995	21.4	6.92161	628.823	0.167686	3.30027	226.609	21.9714	374.009	14.9584	5335.94
37.nii.gz	-13.4984	42.0531	1.42635e+08	4.08266	29.0608	3.1004	78.9353	12.7035	17.0247	10.4093	-92.8736	171.809	12.0893	313.423	0.0970576	1141083345	0.0683972	450.311	500.033	7942.13	129.624	54.5402	14.4383	0.580948	2.85361	2.96902	5.58101	0.396736	0.314823	0.988718	0.928399	-0.155157	0.814656	0.304074	22.1357	0.00800431	7.47016	0.0253669	4.82963	17.2446	6.75813	232.661	0.160235	5.36955	99.3127	18.038	503.979	18.0083	8874.34
38.nii.gz	-21.3166	50.4039	6.66408e+08	4.49766	37.4296	3.23844	90.6009	12.0389	22.18	10.214	-115.648	206.249	15.5886	313.282	-0.0202777	5331262458	0.0518151	777.197	720.017	24211.1	224.852	86.4486	31.3256	0.465068	3.96864	3.349	12.9202	0.358683	0.278714	0.984251	0.921323	-0.139488	0.721215	0.270248	26.5734	0.00503094	8.27653	0.0142235	5.19587	29.4436	7.19122	1142.22	0.168221	3.77201	351.824	31.1447	755.674	15.2401	11462.1
39.nii.gz	-22.2756	27.7373	1.94727e+08	3.95038	23.7704	3.09085	54.482	3.625	14.9427	3.70312	-59.7461	114.228	10.1461	304.222	-0.22558	1557819752	0.0772677	362.938	169.106	4529.62	-59.9137	37.3557	14.4889	0.425723	2.84342	2.98308	5.84346	0.394018	0.311081	0.975202	0.897655	-0.104073	0.675871	0.30817	12.7807	0.00901809	7.31431	0.0246122	4.59658	12.9612	6.62532	337.348	0.160336	3.95624	162.571	14.5836	189.416	16.1663	2823.71
4.nii.gz	-6.92033	34.6335	3.77945e+08	3.72174	24.2598	2.62941	59.1362	12.8959	13.3802	11.8429	-42.7801	101.916	9.8618	313.317	0.1353	3023557647	0.0855105	263.603	148.217	2844.09	47.0364	34.6124	7.45927	0.646987	2.06961	2.43992	2.49319	0.463474	0.391895	0.983943	0.915419	-0.198867	0.808041	0.355439	11.8919	0.0141146	6.66368	0.0324524	4.49636	10.5179	6.76283	501.686	0.130308	5.83671	329.216	10.5917	156.6	27.7148	4094.72
40.nii.gz	-11.8771	19.1679	1.49828e+08	3.16703	13.0082	3.37292	40.3848	1.57679	8.84819	-0.0988169	-28.7709	69.1558	5.79273	301.796	0.679104	1198623166	0.136575	132.23	44.917	596.619	30.2605	12.0041	4.41673	0.42609	1.5334	2.24431	1.90264	0.530704	0.476584	0.981723	0.913558	-0.115646	0.606504	0.428391	6.55856	0.0319228	5.59387	0.0797343	3.7174	4.1052	6.4219	155.608	0.0945945	10.6672	224.666	5.38271	51.8462	43.2578	1803.41
41.nii.gz	-11.2068	52.5329	5.05379e+07	4.28751	37.9447	2.63398	88.5436	18.8755	20.4965	14.8791	-50.9277	139.471	14.9277	319.849	0.243647	4.04303e+08	0.0600813	621.815	206.143	11990.2	248.52	60.8381	15.2064	0.555822	2.93338	2.97087	6.10388	0.38415	0.296712	0.983188	0.91346	-0.277841	0.940963	0.282703	13.9127	0.0112351	6.90737	0.0324078	4.67743	19.0111	6.40439	99.4939	0.201405	2.67631	29.6802	25.2082	258.049	11.0324	2358.41
42.nii.gz	-14.6653	52.4639	3.58214e+07	4.12095	37.0879	3.20956	85.5391	10.8403	21.7408	1.90552	-41.8663	127.405	14.8369	311.995	0.923592	2.86571e+08	0.0740046	719.013	163.026	38078.6	1122.51	108.456	3.23224	0.941178	1.32353	2.05119	1.36708	0.555337	0.508783	0.995641	0.954951	-0.427002	0.982424	0.466466	11.6923	0.018699	6.38466	0.047201	4.96031	27.922	6.03438	82.538	0.224288	2.09759	27.2337	28.823	165.103	9.96196	1296.84
43.nii.gz	-10.7308	28.0866	7.2019e+07	3.60492	17.6927	4.02178	64.917	7.23567	11.8406	6.57489	-56.9444	121.861	7.68972	307.632	0.344992	5.76152e+08	0.102571	243.627	205.484	1774.2	62.0892	21.3607	13.7365	0.21512	3.00281	2.67055	3.2261	0.370688	0.279424	0.979108	0.898013	-0.228802	0.885624	0.251891	14.2655	0.0201911	6.23966	0.0598119	4.02445	8.7743	6.17974	118.196	0.155316	3.76249	78.0565	9.75805	203.703	16.2668	3152.4
44.nii.gz	-15.4255	30.6079	1.14598e+08	3.83481	25.1638	2.62841	62.8087	7.63392	14.2465	7.3346	-31.0936	93.9023	10.2529	308.131	0.217181	9.16787e+08	0.0784138	306.146	83.0028	2879.44	46.8757	31.3828	15.226	0.339518	3.06243	2.99255	5.1243	0.367822	0.279376	0.965632	0.87614	-0.102357	0.686125	0.280469	8.88589	0.00861156	7.19616	0.0194665	4.45985	11.6522	6.29877	223.085	0.184826	2.59709	94.6454	12.362	93.4963	12.1317	1031.79
45.nii.gz	-11.185	36.3423	1111134968	4.00068	25.756	3.39104	85.5592	12.6115	15.3236	12.2606	-57.4596	143.019	10.56	313.217	0.0685136	8889079741	0.0743525	378.834	215.131	5200.51	34.8278	36.1741	16.7094	0.334358	3.03504	2.93985	5.90577	0.394675	0.315317	0.982601	0.91389	-0.1193	0.549023	0.299929	14.4975	0.00964904	7.31076	0.0220032	4.56838	13.2209	6.92542	1651.32	0.145799	5.02821	842.116	15.2285	240.873	20.9746	4719.99
46.nii.gz	-20.5802	50.1877	9.4214e+07	4.4522	41.1166	2.42522	90.2528	14.0498	22.9731	13.8467	-58.9559	149.209	17.1186	315.249	0.153813	7.53712e+08	0.0512583	754.577	250.248	21324.2	179.948	93.6362	15.7871	0.704158	3.02444	2.98797	5.71125	0.381797	0.298005	0.984414	0.916002	-0.258874	0.937819	0.2953	15.1891	0.00663202	7.59318	0.0181931	5.19724	27.3558	6.77958	179.85	0.189715	2.64653	48.5928	30.3361	265.253	12.173	2974.75
47.nii.gz	-4.03561	49.7914	3.35462e+08	4.11304	28.92	2.96507	89.7872	21.6809	16.888	20.7935	-56.7472	146.534	11.9221	322.37	0.108901	2683693206	0.0670231	443.859	293.178	7985.08	72.1853	53.291	14.3562	0.570343	2.88432	2.99118	5.52768	0.385373	0.300218	0.984929	0.916999	-0.127278	0.764283	0.300904	16.8353	0.00679578	7.62494	0.0152517	4.87369	16.9118	6.68312	585.314	0.181324	3.12433	216.351	17.8563	301.436	12.9219	3855.21
48.nii.gz	-10.0954	29.3778	8.77939e+07	3.69193	19.3119	5.24691	58.1844	7.96032	12.5769	6.99723	-69.3257	127.51	8.35879	308.412	-0.452307	702351553	0.0952392	278.477	255.061	2981.23	-15.7052	24.1943	9.09034	0.421926	2.26362	2.66461	3.68981	0.43332	0.356307	0.987326	0.924067	-0.134103	0.743912	0.356882	15.8512	0.0161215	6.49031	0.0382539	4.19642	8.32116	6.30155	137.711	0.149199	4.73669	87.9057	11.229	270.15	18.0596	4422.51
49.nii.gz	-26.3442	47.4673	7.80089e+07	4.47814	41.2711	2.50889	81.1154	7.90901	22.9007	4.92883	-55.2636	136.379	16.4126	309.191	0.298798	6.24071e+08	0.0505214	791.223	202.873	18929	221.536	80.1546	29.1806	0.453665	4.22787	3.4462	10.3833	0.304233	0.21017	0.968694	0.880974	-0.171353	0.877324	0.218334	13.7848	0.00484372	8.00952	0.013989	5.08335	27.3338	6.33967	217.882	0.267013	1.51196	41.2255	31.762	229.516	6.65196	1451.99
5.nii.gz	-8.70159	42.8862	2.45712e+08	4.08289	27.6713	3.32523	81.7047	17.2481	16.3851	18.356	-70.4638	152.168	11.4359	317.922	-0.165567	1965695682	0.0695329	428.072	361.63	6961.26	-17.4059	46.5408	15.7377	0.485297	2.90732	3.00359	6.48765	0.396172	0.31524	0.985599	0.921679	-0.125423	0.723035	0.311077	18.8128	0.0078424	7.51481	0.0195626	4.77774	15.5696	6.80808	367.695	0.151253	3.97185	169.035	17.2156	376.358	17.6384	6365.18
50.nii.gz	-11.7053	35.9893	8.09095e+07	3.9647	26.373	3.78705	64.4038	10.8665	15.3475	11.3416	-79.9439	144.348	10.7637	311.47	-0.224305	6.47276e+08	0.0744728	375.809	358.147	5711.89	-78.2397	40.4562	8.89904	0.626217	2.24884	2.69093	3.5975	0.440162	0.365216	0.989805	0.931464	-0.199188	0.871451	0.356192	18.715	0.0111866	6.86945	0.0286832	4.60571	12.3388	6.61726	128.671	0.154282	4.70072	62.1103	15.0451	363.713	17.0264	6026.02
51.nii.gz	-6.53751	49.1907	2.15538e+08	4.12943	29.786	3.02659	97.2122	18.8787	17.4331	16.9905	-61.8985	159.111	12.4142	319.61	0.267946	1724301707	0.0668372	466.975	289.174	8287.46	156.961	51.0354	12.4464	0.590861	2.62706	2.89972	5.14824	0.411188	0.331207	0.989083	0.929999	-0.143427	0.784091	0.324635	16.7152	0.00871518	7.40623	0.0261038	4.80163	15.8704	6.87568	301.202	0.14275	5.10023	141.027	18.8076	317.36	19.0616	5373.07
52.nii.gz	-15.9317	31.7214	1.68638e+07	3.80724	29.2134	3.29708	45.1909	10.6731	16.4629	16.0627	-57.8587	103.05	11.8596	311.317	-0.844316	1.3491e+08	0.0846215	400.372	261.124	3364.46	-139.235	26.6215	10.9979	0.292375	2.54628	2.7418	4.32035	0.405314	0.322138	0.978918	0.902453	-0.272823	0.911357	0.325074	16.02	0.0218263	5.83212	0.0468638	3.85526	9.40485	5.42825	37.7241	0.216805	2.06844	14.7241	16.2868	230.724	9.05747	2533.9
53.nii.gz	-17.5348	40.6703	3.09999e+07	3.95736	25.9556	2.59387	63.1065	14.5556	16.2431	16.8547	-32.9351	96.0416	11.2085	315.212	-0.321173	2.47999e+08	0.0736974	413.335	122.623	5637.52	-115.917	44.6337	12.9791	0.544206	2.90341	2.80424	3.9792	0.360437	0.267431	0.970155	0.880381	-0.300639	0.945922	0.288652	10.7021	0.0130446	6.56792	0.0342483	4.48114	14.4032	5.91915	72.7372	0.233132	1.88359	22.9936	16.495	125.269	7.97436	964.936
54.nii.gz	-7.85267	44.9452	9.96057e+07	4.07611	29.974	2.90585	68.9925	17.8026	16.8272	17.716	-57.3606	126.353	12.0374	318.483	-0.123428	7.96846e+08	0.0675831	432.967	262.509	5799.97	-4.78988	43.1806	15.5414	0.459377	2.99492	3.01937	5.87364	0.382533	0.298638	0.978666	0.903185	-0.136436	0.778099	0.298459	15.9865	0.00787016	7.36178	0.0200518	4.67951	14.6805	6.52953	174.458	0.177656	3.51128	66.3666	17.3237	275.119	13.7617	3774.47
55.nii.gz	-11.6017	33.3063	2.83888e+08	3.86827	23.0511	3.82823	74.8451	9.42761	14.1015	7.85716	-103.534	178.379	9.62057	309.952	0.0294446	2271100258	0.0825416	324.788	536.23	4662.15	46.2509	35.9375	10.1192	0.556632	2.36058	2.77845	4.23291	0.435244	0.359778	0.992435	0.941176	-0.121793	0.729946	0.346349	23.0164	0.0113949	7.08529	0.0327526	4.56843	11.5142	6.85608	379.106	0.128293	6.87414	243.91	12.9787	560	24.8856	13222.5
56.nii.gz	-14.3618	45.2694	1.51727e+08	4.2798	32.2719	3.62252	84.6691	14.5964	19.1563	15.0783	-81.2093	165.878	13.3172	315.528	-0.350397	1213813439	0.0606843	587.321	419.034	11864.3	-48.424	61.598	20.9286	0.484419	3.40783	3.23645	8.65712	0.36118	0.274979	0.983129	0.914399	-0.134383	0.794893	0.274681	20.2199	0.00610307	7.80712	0.0169584	4.95472	20.6317	6.70316	280.181	0.183846	2.98815	92.4829	23.5071	440.749	12.21	5204.31
57.nii.gz	-12.5755	34.074	1.36009e+08	3.88951	22.9345	3.16746	60.501	8.1769	14.3964	6.16266	-55.5983	116.099	9.76067	308.725	0.180307	1088072407	0.0810974	338.174	196.499	4631.23	70.2077	36.5871	10.5968	0.545273	2.43137	2.8047	4.40888	0.423406	0.345961	0.984104	0.916555	-0.131452	0.763863	0.34787	13.7836	0.0112379	7.05552	0.0280292	4.55928	11.796	6.57931	205.796	0.144216	4.46537	115.726	13.6794	213.584	18.78	3585.26
58.nii.gz	-14.7862	29.9807	1.1452e+08	3.7554	20.8339	2.98568	52.7686	5.5423	13.2004	4.28412	-49.7092	102.478	9.03067	306.004	0.221223	9.16157e+08	0.0878067	282.211	138.833	3391.34	71.1269	32.6116	7.18482	0.634002	2.00231	2.5653	3.04497	0.462017	0.391263	0.984754	0.917946	-0.157126	0.806512	0.382597	11.5096	0.013948	6.72415	0.0366228	4.47546	9.94912	6.66521	154.39	0.126239	5.97936	107.388	11.385	145.911	25.5544	3388.91
59.nii.gz	-17.7858	24.3004	2.32468e+08	3.88728	20.2064	4.86341	70.6982	3.31855	13.8295	3.84877	-98.6413	169.34	8.59473	303.906	-0.27991	1859743332	0.087045	356.982	444.15	7861.58	-105.667	39.4312	13.9363	0.476548	2.72665	2.97992	6.17657	0.410491	0.332289	0.989158	0.931615	-0.0997999	0.680714	0.326821	20.923	0.0109058	7.26489	0.0282876	4.59241	13.3419	6.77432	331.888	0.131859	5.91501	219.092	14.3932	462.833	23.0961	10586.2
6.nii.gz	-21.6844	27.552	8.95265e+07	3.94139	21.6595	3.36399	62.0196	1.63232	14.5944	0.0563842	-50.1582	112.178	9.31474	302.248	0.223445	716211869	0.0823178	371.499	139.025	6258.99	94.6533	40.6129	10.3238	0.579648	2.47099	2.79333	3.93035	0.416334	0.33669	0.983034	0.911786	-0.156991	0.813854	0.335073	11.4647	0.0124123	7.00241	0.0392089	4.5937	12.7342	6.55627	150.504	0.153576	4.95197	80.6714	15.0236	154.866	18.5816	2539.17
60.nii.gz	-23.6277	30.9418	1313312674	4.17954	23.447	7.1774	93.1772	4.99078	17.2682	7.71034	-168.556	261.733	10.2335	305.975	-1.25314	10506501392	0.0737337	601.433	1279.72	39460.7	-784.13	67.8078	22.1677	0.505834	3.23227	3.24643	11.4436	0.388274	0.308468	0.992517	0.945623	-0.0832093	0.673212	0.307009	35.6133	0.00832701	7.87866	0.0249628	4.90498	22.4939	7.05258	1851.98	0.13202	6.41017	1034.34	24.1338	1284.12	22.3828	29353.4
61.nii.gz	-9.55959	36.9045	1.64929e+08	3.88434	23.0903	5.60438	60.7253	15.3289	15.0431	18.5469	-90.1316	150.857	9.76681	315.968	-1.26612	1319429351	0.0830214	403.437	528.869	10326.6	-323.038	41.6185	14.6445	0.480628	2.73015	3.00012	6.89073	0.412461	0.334421	0.986695	0.92627	-0.111458	0.734014	0.328609	22.8498	0.0103618	7.1717	0.0254612	4.56515	14.0657	6.61575	221.562	0.134117	5.34159	137.151	16.252	525.366	20.3596	11606.3
62.nii.gz	-14.8363	26.1154	4.75541e+08	3.73503	19.5022	5.47032	63.1986	5.70413	12.5856	6.51135	-95.7863	158.985	8.1952	306.169	-0.792601	3804330765	0.0931718	284.657	477.67	5217.6	-117.738	32.0214	7.69125	0.610131	1.94042	2.58492	3.80909	0.48476	0.420886	0.99325	0.947202	-0.138835	0.771883	0.395997	21.716	0.015411	6.76326	0.0461059	4.48806	9.92815	7.0114	499.284	0.0984198	10.1373	472.661	11.4674	480.126	38.6132	18871.5
63.nii.gz	-24.9888	32.6157	1.02343e+08	4.12508	30.2518	2.55646	58.0365	2.19737	17.6603	0.950531	-55.4826	113.519	12.7718	302.965	0.170497	8.18747e+08	0.0647469	464.542	165.487	8592.46	130.723	55.4534	13.7632	0.60038	2.88309	2.97879	5.08399	0.380449	0.293617	0.977732	0.899052	-0.143765	0.812957	0.295886	12.452	0.00703664	7.54143	0.019422	4.86806	17.3042	6.57484	193.343	0.173401	2.90189	72.1928	18.7177	186.02	13.5184	2259.45
64.nii.gz	-13.6897	30.9276	148176471	3.83948	22.0175	3.53878	56.9754	7.19627	13.7544	6.37948	-65.8624	122.838	9.35282	307.704	-0.0837677	1185411768	0.0839192	311.903	254.24	4331.49	35.6359	35.6125	10.2942	0.54919	2.4026	2.80742	4.33846	0.42484	0.346273	0.985663	0.920104	-0.120137	0.749119	0.341238	15.745	0.0110041	7.08147	0.0280198	4.56328	11.4767	6.5932	218.22	0.139438	4.77522	131.334	12.5733	266.635	20.384	5097.73
65.nii.gz	-13.8831	23.8113	1491878960	3.65565	17.6243	4.38447	79.1643	4.31727	11.6928	4.26894	-77.8186	156.983	7.50467	304.719	-0.197714	11935031680	0.100158	244.612	302.051	3448.81	-33.1644	28.0246	7.94712	0.555719	2.01697	2.63475	3.783	0.472818	0.406605	0.992543	0.943591	-0.101502	0.689031	0.390994	17.2346	0.0156369	6.80279	0.040727	4.40634	8.99293	6.97628	1594.88	0.0992642	9.63066	1609.24	9.83835	311.357	37.9772	11545.3
66.nii.gz	-13.7142	28.724	3.44535e+08	3.8063	20.9799	4.13331	68.2362	7.93728	13.207	8.511	-75.8723	144.109	8.7994	308.42	-0.388823	2756281396	0.0871347	297.543	330.72	3906.45	-38.4741	32.0419	10.2902	0.51097	2.31841	2.79479	4.76291	0.441792	0.3687	0.989188	0.932212	-0.101237	0.694668	0.360279	18.0355	0.0116231	7.06552	0.0289212	4.51772	10.583	6.92298	418.739	0.11561	7.58987	315.602	11.9961	339.184	28.423	9607.54
67.nii.gz	-23.7445	17.8651	5.59146e+08	3.78538	20.8472	3.70731	61.9923	-2.44352	13.0003	-1.55742	-70.6066	132.599	8.71253	298.033	-0.226843	4473164795	0.0883693	283.904	227.098	4208.22	-51.2847	33.4967	11.5082	0.488433	2.53456	2.88654	4.88228	0.416079	0.336611	0.986134	0.921584	-0.0792858	0.625281	0.332489	14.8862	0.0101033	7.2447	0.0252353	4.55331	11.2512	6.78682	829.776	0.131815	5.3836	556.285	11.4471	236.762	24.1568	5770.55
68.nii.gz	-13.8001	19.4427	2.72566e+08	3.47666	16.461	5.60922	48.5406	2.26064	10.4895	2.14918	-82.5972	131.138	6.90604	302.584	-0.425734	2180529445	0.110672	195.841	319.791	3220.77	-52.5167	23.4141	6.08124	0.586456	1.77601	2.45466	2.83043	0.496012	0.434059	0.992027	0.941301	-0.126033	0.731399	0.410726	17.7611	0.018833	6.3977	0.0456471	4.24095	7.37383	6.76588	298.682	0.10033	9.46234	329.472	7.90397	330.177	39.2687	12726.3
69.nii.gz	-15.9851	33.2721	1.28299e+08	3.92533	23.7861	3.03001	61.8893	6.80445	14.6881	5.65398	-63.3111	125.2	10.1251	307.37	0.111775	1026391311	0.0778857	347.402	222.481	4605.55	61.7017	38.605	10.25	0.575704	2.37261	2.79551	4.40183	0.434103	0.358696	0.985723	0.921194	-0.137434	0.777794	0.347427	14.676	0.0109329	7.11379	0.03263	4.63533	12.2137	6.82533	169.315	0.12468	7.08994	105.769	13.989	234.943	25.7997	5524.3
7.nii.gz	-27.6443	41.8579	9.38837e+07	4.40121	36.695	2.62153	81.3625	10.1403	21.3631	12.6714	-71.4773	152.84	15.1905	311.267	-0.209757	7.51069e+08	0.0542142	700.135	306.111	12436.2	-14.9357	66.5706	32.2005	0.321268	4.24912	3.41755	11.8285	0.329509	0.243833	0.971517	0.89149	-0.171805	0.84696	0.240553	17.2482	0.00568845	7.82929	0.0172905	4.92804	24.6928	6.65668	201.326	0.207767	2.725	52.5335	28.0465	335.544	10.2549	3407.44
70.nii.gz	-12.2926	29.9756	2.9808e+08	3.79002	21.5421	3.94879	50.8942	7.57984	13.3292	7.57511	-79.0686	129.963	9.05831	308.058	-0.427719	2384638548	0.0861807	294.298	327.777	4357.51	-51.0346	35.0692	9.30451	0.576445	2.22407	2.70727	4.09884	0.447857	0.375596	0.98796	0.928168	-0.128317	0.740263	0.367345	17.9258	0.0116383	7.00842	0.0265733	4.56788	11.0934	6.81832	396.556	0.126251	5.95593	270.694	11.8724	336.423	24.8332	8196.61
71.nii.gz	-21.5162	17.8431	1.48752e+08	3.63472	20.3901	2.89601	39.7081	-3.09395	12.1163	-4.1699	-51.5149	91.223	8.41703	297.297	0.225079	1190019889	0.0941084	232.111	119.85	2506.39	44.2064	29.1913	5.57253	0.676915	1.76	2.42039	2.36769	0.492209	0.428309	0.98543	0.920076	-0.164598	0.811745	0.405943	10.6736	0.0152478	6.57134	0.036734	4.43891	8.69096	6.82875	188.024	0.11172	8.57039	158.384	9.41001	127.693	33.5229	3844.05
72.nii.gz	-18.2793	42.3996	4.57793e+07	4.22412	36.7739	2.54323	70.9392	9.5177	19.7893	7.47585	-52.4003	123.339	14.4766	310.447	0.24298	3.66234e+08	0.0610172	576.216	194.641	8456.28	61.5834	55.9477	12.2637	0.610271	2.81507	2.74743	3.59243	0.36733	0.275435	0.982715	0.9068	-0.277166	0.938226	0.296675	13.5498	0.0107761	6.85043	0.0272015	4.71277	17.0529	6.16	113.888	0.239765	1.63938	28.9832	22.9806	202.484	7.84211	1501.6
73.nii.gz	-11.677	46.889	9.91748e+07	4.22624	27.6581	3.36592	84.8227	17.0947	17.9742	17.2096	-73.2473	158.07	11.8437	317.955	-0.138414	7.93398e+08	0.0646961	546.56	357.698	10146.2	-29.4681	55.0081	24.3765	0.383474	3.77132	3.27195	8.68861	0.340764	0.25395	0.977851	0.901186	-0.159755	0.837	0.258592	18.7082	0.00696317	7.63737	0.02236	4.83358	19.8461	6.46763	204.651	0.208615	2.86732	63.4669	21.863	379.578	10.7085	4014.77
74.nii.gz	-14.8662	52.2583	6.18236e+07	4.32927	35.6155	2.57728	81.307	15.7894	20.7026	13.3866	-57.976	139.283	14.8517	316.801	0.217789	4.94589e+08	0.0561488	639.962	224.503	12443.4	143.305	67.5273	12.5637	0.665541	2.68599	2.88632	4.98525	0.400504	0.318329	0.985824	0.919755	-0.25974	0.935746	0.321358	14.4984	0.00854878	7.20697	0.0231529	4.91836	20.0228	6.46116	123.039	0.199739	2.33263	34.5877	25.6787	270.937	10.2565	2404.13
75.nii.gz	-3.85669	41.2015	4.69325e+07	3.87471	25.5211	3.06994	63.1692	19.2524	14.5475	20.961	-51.5261	114.695	10.261	319.765	-0.198447	3.7546e+08	0.0788158	327.438	234.75	2812.63	-38.3904	31.4352	15.9007	0.323421	3.09951	2.97945	5.53087	0.365891	0.277781	0.974479	0.892723	-0.188939	0.864625	0.286016	15.1927	0.0109535	6.84961	0.0320632	4.3817	11.834	5.96231	100.303	0.218525	1.99201	36.1765	13.3442	248.656	9.0915	2253.64
76.nii.gz	-15.5674	38.5622	1.23397e+08	4.07113	30.9607	2.58473	76.066	9.79295	17.0923	8.70482	-51.9688	128.035	12.5694	310.49	0.208815	9.87175e+08	0.0673047	432.107	180.705	6253.42	65.112	49.2797	14.695	0.532985	2.91573	2.93909	5.29877	0.388184	0.305411	0.981095	0.90835	-0.147035	0.773686	0.305544	13.1155	0.00786884	7.42108	0.0198526	4.78667	15.9937	6.72443	204.127	0.159474	4.17166	86.15	17.3987	198.659	16.7188	2887.96
77.nii.gz	-17.1741	44.534	2.98503e+08	4.33664	30.3487	4.44986	90.9541	15.1922	19.4806	17.4395	-104.017	194.971	12.8282	316.229	-0.707652	2388020708	0.0609838	654.751	601.426	22888.3	-403.917	68.2001	28.2887	0.402326	3.83695	3.37831	12.1963	0.34986	0.264966	0.983723	0.91819	-0.113206	0.71622	0.261233	24.3194	0.00614633	8.01014	0.0161298	4.99406	24.1222	6.96823	490.757	0.164408	4.07358	182.037	26.3043	628.764	15.1601	9681.84
78.nii.gz	-4.12423	59.4658	2290120053	4.32406	34.696	2.89419	104.238	25.5559	20.0285	22.3929	-74.9333	179.172	14.3031	326.499	0.0832846	18320960427	0.0587739	614.874	446.677	13386.5	65.6706	69.6548	26.6785	0.444297	3.50682	3.12213	11.5933	0.398689	0.325694	0.981326	0.918605	-0.163694	0.694159	0.300728	20.8785	0.00705699	7.90626	0.0197288	5.03186	24.0833	7.31821	3041.81	0.141591	5.12551	1262.64	24.6918	449.655	23.0074	10154.2
79.nii.gz	-4.26847	43.9565	6.42572e+07	3.96046	23.9872	4.45197	69.4666	21.7947	15.7776	24.4113	-57.7322	127.199	10.4312	322.453	-0.93087	5.14058e+08	0.0790314	424.212	303.817	7416.44	-221.539	38.658	19.8448	0.313117	3.3062	3.15818	7.97927	0.371502	0.287591	0.973498	0.895497	-0.17091	0.843452	0.284102	17.2932	0.0106679	7.02648	0.0308909	4.47128	14.6257	6.18198	116.35	0.188268	3.13878	48.8414	17.0566	300.963	12.0227	4045.26
8.nii.gz	-13.2334	26.0108	2.9495e+07	3.52876	16.2491	5.46974	73.0244	4.06896	12.3727	0.46238	-27.5141	100.538	7.40744	304.551	1.44714	2.3596e+08	0.113128	293.674	47.078	3419.48	149.039	20.2173	8.08355	0.295946	2.09585	2.50618	3.44042	0.453312	0.376631	0.983235	0.914801	-0.223982	0.861221	0.347352	6.6222	0.0260332	5.66344	0.0602214	3.75349	7.07522	5.90774	48.1761	0.151497	4.47561	35.9748	11.9759	65.7075	16.9245	792.242
80.nii.gz	0.177348	51.0267	1.00423e+08	3.97344	23.4208	3.7052	76.82	27.456	15.4215	29.6699	-44.2708	121.091	10.0855	328.077	-0.722947	803382238	0.0775185	406.849	237.109	5495.46	-155.65	37.607	23.987	0.23293	3.61483	3.18063	8.97031	0.360931	0.278332	0.966303	0.884111	-0.166926	0.82164	0.275123	15.2873	0.00999588	7.17288	0.0249509	4.50807	15.3985	6.31672	165.307	0.177177	2.88441	72.3248	16.3537	241.418	12.8478	3336.14
81.nii.gz	-2.91041	50.3437	5.32779e+07	4.05441	29.1504	2.7629	80.3821	23.8266	16.6368	22.6263	-29.4853	109.867	11.6692	324.488	0.2104	4.26223e+08	0.0696543	428.515	129.996	6712.04	135.235	46.3332	12.2741	0.56716	2.7411	2.87362	4.37122	0.387779	0.302205	0.978272	0.89956	-0.219548	0.90113	0.310225	11.0214	0.0102836	6.94877	0.0263883	4.62292	14.6518	6.21986	106.791	0.211048	2.68739	35.2451	17.3747	143.826	11.1502	1557.42
82.nii.gz	-24.39	34.6624	7.39635e+07	4.27862	29.7835	3.45142	92.7596	5.43648	18.5982	6.30712	-75.8386	168.598	12.576	306.37	-0.113045	5.91708e+08	0.0620668	570.89	289.008	14203.3	-157.885	63.8393	26.9075	0.412692	3.90859	3.33853	10.1427	0.335431	0.247532	0.979593	0.905901	-0.179175	0.871211	0.250922	16.7229	0.0060961	7.76068	0.0159954	4.92878	22.6867	6.46039	162.386	0.206073	2.24397	48.9086	23.0868	332.008	9.79949	3011.02
83.nii.gz	-6.4426	39.2093	7.60552e+07	3.8991	21.1852	4.12577	72.0531	13.4833	14.4732	10.8402	-61.7838	133.837	9.17274	314.078	0.279438	6.08441e+08	0.0855039	373.069	257.275	6434.37	137.767	39.6322	12.3863	0.517688	2.58783	2.89164	5.42601	0.415441	0.336886	0.985228	0.920429	-0.171884	0.844388	0.334695	15.8243	0.012677	6.88998	0.0372881	4.52428	13.0046	6.3835	123.687	0.160425	3.83861	65.9235	15.04	276.968	15.6433	3894.85
84.nii.gz	-8.79482	37.6746	5.96787e+07	3.89259	23.8333	3.19366	59.437	14.0538	14.469	13.7119	-47.9175	107.354	9.87568	314.594	-0.130298	4.7743e+08	0.0791427	339.882	176.836	3940.66	20.0253	35.8336	15.1797	0.395528	2.97099	2.96781	5.60351	0.383207	0.298693	0.971609	0.889247	-0.184169	0.859778	0.294675	13.1003	0.0102412	6.94024	0.0239102	4.50403	12.7533	6.18568	114.459	0.189817	2.63677	47.7231	13.7112	190.517	11.597	2154.06
85.nii.gz	-33.0593	16.2947	3.04826e+07	3.8219	22.332	2.86697	30.3847	-12.7708	14.3721	-14.6023	-65.5301	95.9148	9.82687	287.808	0.271573	2.43861e+08	0.0836041	332.633	129.372	2664.81	18.3968	25.8567	7.39848	0.486959	2.11791	2.50676	2.70855	0.433974	0.35612	0.984145	0.912991	-0.23723	0.889426	0.373937	11.1591	0.0185772	6.08313	0.0395131	4.09577	8.31381	6.01964	68.8478	0.187086	2.53731	30.7663	13.3886	155.633	11.7011	1784.36
86.nii.gz	-13.7825	33.5106	5.45992e+07	3.85634	27.1284	2.63121	49.1727	10.327	15.0178	10.5836	-48.0529	97.2255	10.9368	310.863	-0.263714	4.36794e+08	0.0780547	333.015	158.625	3695.4	-65.8047	37.1424	13.9723	0.45501	2.9117	2.89756	4.66556	0.376643	0.289777	0.968317	0.881421	-0.185009	0.864057	0.299651	12.3602	0.0102586	6.92527	0.0248041	4.51982	12.7787	6.06451	121	0.214159	2.01117	44.1009	13.2166	170.908	9.56637	1578.21
87.nii.gz	-7.09394	43.1574	2.12049e+08	4.03115	26.29	3.36166	87.6114	15.6879	15.9774	13.4458	-57.003	144.614	10.9348	316.339	0.293704	1696394883	0.0737009	411.632	245.475	7327.86	113.167	46.8895	13.9511	0.535344	2.69574	2.95528	6.19032	0.416999	0.339537	0.98551	0.922725	-0.133658	0.763113	0.324681	15.402	0.00951787	7.3792	0.0287705	4.74752	15.2102	6.9481	284.695	0.134354	7.55943	156.172	16.5617	261.066	23.6918	5474.15
88.nii.gz	-10.3869	53.5913	1.85004e+08	4.38563	33.3063	3.33994	98.3585	21.7152	20.2973	22.8124	-68.4014	166.76	13.7751	322.752	-0.273829	1480035501	0.0571091	668.523	361.949	15841	-58.2566	68.0483	24.6638	0.450321	3.55209	3.27781	11.0245	0.36115	0.27653	0.980696	0.91217	-0.147543	0.812703	0.27969	18.7374	0.00599693	7.91334	0.0164248	5.01511	23.178	6.83026	326.954	0.184096	3.21456	101.426	26.8726	381.97	12.6453	4610.82
89.nii.gz	-13.2173	31.5736	1.42691e+08	3.77222	23.0969	3.13873	66.7951	6.29536	13.9657	3.17011	-53.7697	120.565	9.72193	306.795	0.603168	1141528603	0.087314	306.554	159.72	3819.49	154.829	33.803	8.95295	0.575593	2.20924	2.71371	3.90136	0.448272	0.37496	0.98652	0.923411	-0.13372	0.766745	0.359029	12.3894	0.0142201	6.80092	0.0418816	4.4264	10.689	6.69894	182.627	0.120466	7.68701	132.368	12.2976	175.028	27.2309	3841.4
9.nii.gz	-1.47629	43.337	1.78561e+08	3.90973	23.0519	4.35085	94.637	21.277	14.4749	22.19	-56.4631	151.1	9.72393	321.829	-0.444916	1428490415	0.0805793	354.952	279.904	5046.64	-97.4019	33.9651	18.0444	0.307189	3.09027	3.09886	7.69855	0.391344	0.312641	0.98255	0.915383	-0.11504	0.725366	0.312281	16.6098	0.00963624	7.24359	0.0251385	4.48922	13.0024	6.4693	300.686	0.174412	4.1406	138.919	14.2095	294.617	14.2297	4237.49
90.nii.gz	-8.0626	26.3442	6.66221e+07	3.44123	18.3068	3.05209	50.5478	7.97608	11.0351	5.93378	-20.5501	71.0979	7.67062	308.283	0.567785	5.32977e+08	0.107751	189.374	48.148	1223.53	46.863	19.0864	6.47908	0.480084	1.89572	2.49654	2.73541	0.477074	0.409473	0.976899	0.901384	-0.130903	0.730802	0.389486	6.70582	0.0203786	6.17332	0.0609847	4.07114	6.39137	6.25661	83.0799	0.118516	7.99945	75.5335	7.68621	57.8716	28.903	1154.99
91.nii.gz	-20.8181	36.3487	4.82916e+07	4.24388	26.3213	5.85539	93.0012	6.59279	18.7719	4.10786	-123.614	216.615	11.4372	307.716	-0.141494	3.86333e+08	0.0695271	690.28	745.01	26107.1	152.574	67.4516	18.5148	0.555248	3.26971	3.12457	7.32564	0.36159	0.273677	0.990786	0.933866	-0.230729	0.917513	0.274882	27.0689	0.00956404	7.22876	0.030204	4.79587	21.4916	6.39772	98.3725	0.192887	3.50434	35.4588	27.7086	747	12.2706	8824.84
92.nii.gz	-9.18005	33.6149	8.50272e+08	3.82222	20.714	3.54433	74.4496	13.0279	13.3076	13.6922	-53.7537	128.203	8.82897	313.506	-0.226743	6802176697	0.0864524	299.513	202.354	3936.87	-57.1144	31.6467	10.0463	0.493325	2.242	2.67412	4.36759	0.462481	0.39437	0.986149	0.925812	-0.132467	0.629301	0.361562	14.0339	0.0141547	6.89481	0.035785	4.47669	10.4232	7.08236	956.497	0.110565	9.55402	747.9	12.0904	211.112	34.2475	6966.49
93.nii.gz	-21.2768	34.2523	1.93151e+08	4.15811	28.362	3.53082	69.4772	3.77038	17.5394	3.01852	-81.02	150.497	12.1157	304.585	-0.0492736	1545211398	0.0669625	495.614	330.826	11120.8	126.787	57.9613	14.3063	0.599145	2.6644	2.92139	6.67362	0.418536	0.341224	0.98627	0.925989	-0.171633	0.837695	0.333323	17.885	0.00891472	7.43966	0.0247912	4.8965	18.0669	6.92493	298.482	0.143363	5.51623	139.416	19.9818	353.246	19.7685	6183.43
94.nii.gz	-14.4521	26.3782	2.08663e+08	3.75985	20.0883	3.67923	75.8444	5.92288	12.8605	5.37025	-47.7851	123.629	8.60024	306.375	0.161007	1669306811	0.0899007	276.848	141.664	3799.45	40.1874	30.2181	9.6902	0.502855	2.27559	2.71219	4.06626	0.449981	0.379249	0.986427	0.924303	-0.132579	0.721284	0.361762	11.6845	0.0129464	6.86774	0.0297294	4.43331	9.97706	6.77564	277.816	0.124973	6.96638	199.849	11.1909	147.68	26.3414	3909.62
95.nii.gz	-14.1091	38.6207	5.92153e+07	3.96392	31.8713	2.13952	57.3613	10.9284	16.847	9.67483	-33.9377	91.2989	12.859	311.567	0.142125	4.73723e+08	0.0698898	397.858	102.035	4278.69	40.9663	44.5989	13.3842	0.522078	2.86389	2.89592	4.56424	0.378699	0.291188	0.966551	0.87778	-0.172981	0.840865	0.29662	9.70678	0.00890657	7.11331	0.0219999	4.61731	14.4958	6.21976	120.17	0.197001	2.27196	42.6328	16.0237	109.923	11.1934	1154.45
96.nii.gz	-10.42	35.3624	2.16967e+08	3.90907	26.1443	3.18073	80.559	11.504	14.9752	9.36952	-52.47	133.029	10.5592	312.061	0.40327	1735733093	0.0781586	347.08	190.231	4912.95	125.675	37.1547	8.43912	0.612701	2.23659	2.57898	2.87707	0.43831	0.361781	0.989585	0.929349	-0.167035	0.776592	0.34763	13.5293	0.0119802	6.87542	0.0281423	4.57177	11.3985	6.81577	304.676	0.136749	5.72509	174.137	13.8916	204.575	23.9443	4293.11
97.nii.gz	-8.73848	42.1401	2.38151e+08	4.05001	26.0706	3.44443	79.8303	16.4752	15.967	16.5545	-57.5961	137.426	10.8973	317.129	-0.234508	1905208911	0.0721986	413.989	246.051	6538.15	-28.2781	42.3632	14.4453	0.466343	2.83393	2.97231	5.78785	0.397532	0.315835	0.982817	0.91368	-0.120749	0.712913	0.30941	15.4604	0.00901762	7.35735	0.0235029	4.6882	14.2021	6.84267	352.334	0.14879	5.29864	170.966	16.6612	266.149	18.5743	4590.59
98.nii.gz	-7.95563	58.0388	4.20451e+07	4.23293	37.0721	2.38707	71.3361	27.3972	20.6262	29.2179	-40.215	111.551	15.4312	328.341	-0.400144	336360868	0.0596318	619.071	250.757	13446.1	-334.894	70.3183	22.769	0.513303	3.77146	3.25007	7.72212	0.329472	0.238332	0.964431	0.873167	-0.254287	0.935164	0.237047	15.4511	0.00833967	7.21441	0.0228773	4.83632	23.2718	6.09442	89.0872	0.228429	2.17307	23.2564	24.7717	249.541	8.41026	2418.59
99.nii.gz	-17.4229	21.5136	6.66441e+07	3.72305	19.6419	3.67063	60.0416	1.70149	12.6889	-0.0536479	-49.1285	109.17	8.41684	302.148	0.324194	5.33153e+08	0.0935335	269.521	113.499	1896.12	29.687	22.0769	8.69842	0.396655	2.21159	2.69817	3.69002	0.448038	0.375423	0.984463	0.917361	-0.13498	0.764982	0.360437	10.4927	0.0166139	6.43301	0.051133	4.14058	7.69384	6.2312	118.74	0.162657	4.95227	68.2795	10.9464	128.505	16.3452	1830.54
[truncated: 1,660 more columns]
